# Supplementary material for: Tunability of triplet excited states and photophysical behaviour of bis-cyclometalated iridium(iii) complexes with imidazo[4,5-f][1,10]phenanthroline
Source: Royal Society of Chemistry journal article supplement (doi:10.1039/d4dt01996b), 2024-01-01
Supplement: d4dt01996b1.pdf [file d4dt01996b1.pdf]

## ELECTRONIC SUPPORTING INFORMATION

### Tunability of triplet excited states and photophysical behaviour of bis-cyclometalated iridium(III) complexes with imidazo[4,5-f][1,10]phenanthroline

Katarzyna Choroba<sup>a,\*</sup>, Joanna Palion-Gazda<sup>a</sup>, Mateusz Penkala<sup>a</sup>, Patrycja Rawicka<sup>b</sup>, Barbara Machura<sup>a,\*</sup>

<sup>a</sup> *Institute of Chemistry, Faculty of Science and Technology, University of Silesia, Szkolna 9, 40-006 Katowice, Poland*

<sup>b</sup> *Institute of Physics, Faculty of Science and Technology, University of Silesia, 75 Pułku Piechoty 1a, 41-500 Chorzów, Poland*

#### Table of Contents

|                                                                                                                                                                                                                                                                                                                                     |    |
|-------------------------------------------------------------------------------------------------------------------------------------------------------------------------------------------------------------------------------------------------------------------------------------------------------------------------------------|----|
| EXPERIMENTAL DETAILS.....                                                                                                                                                                                                                                                                                                           | 4  |
| Scheme S1. Schematic of synthesis of complexes 1–4.....                                                                                                                                                                                                                                                                             | 6  |
| NMR SPECTRA .....                                                                                                                                                                                                                                                                                                                   | 7  |
| Figure S1. <sup>1</sup> H (a), <sup>13</sup> C{ <sup>1</sup> H} (b), <sup>1</sup> H– <sup>1</sup> H COSY (c), <sup>1</sup> H– <sup>13</sup> C{ <sup>1</sup> H} HMQC (d), <sup>1</sup> H– <sup>13</sup> C{ <sup>1</sup> H} HMBC (e) and <sup>31</sup> P{ <sup>1</sup> H} NMR (f) spectra of compound 1 in DMSO-d <sub>6</sub> . .... | 9  |
| Figure S2. <sup>1</sup> H (a), <sup>13</sup> C{ <sup>1</sup> H} (b), <sup>1</sup> H– <sup>1</sup> H COSY (c), <sup>1</sup> H– <sup>13</sup> C{ <sup>1</sup> H} HMQC (d), <sup>1</sup> H– <sup>13</sup> C{ <sup>1</sup> H} HMBC (e) and <sup>31</sup> P{ <sup>1</sup> H} NMR (f) spectra of compound 2 in DMSO-d <sub>6</sub> . .... | 12 |
| Figure S3. <sup>1</sup> H (a), <sup>13</sup> C{ <sup>1</sup> H} (b), <sup>1</sup> H– <sup>1</sup> H COSY (c), <sup>1</sup> H– <sup>13</sup> C{ <sup>1</sup> H} HMQC (d), <sup>1</sup> H– <sup>13</sup> C{ <sup>1</sup> H} HMBC (e) and <sup>31</sup> P{ <sup>1</sup> H} NMR (f) spectra of compound 3 in DMSO-d <sub>6</sub> . .... | 15 |
| Figure S4. <sup>1</sup> H (a), <sup>13</sup> C{ <sup>1</sup> H} (b), <sup>1</sup> H– <sup>1</sup> H COSY (c), <sup>1</sup> H– <sup>13</sup> C{ <sup>1</sup> H} HMQC (d), <sup>1</sup> H– <sup>13</sup> C{ <sup>1</sup> H} HMBC (e) and <sup>31</sup> P{ <sup>1</sup> H} NMR (f) spectra of compound 4 in DMSO-d <sub>6</sub> . .... | 18 |
| HRMS SPECTRA.....                                                                                                                                                                                                                                                                                                                   | 19 |
| Figure S5. HRMS spectra of the complexes 1–4 (a–d). ....                                                                                                                                                                                                                                                                            | 22 |
| IR SPECTRA .....                                                                                                                                                                                                                                                                                                                    | 23 |
| Figure S6. FT-IR spectrum of compound 1 (a); FT-IR spectra of compounds 2–4 (lower, red) in comparison with their respective H(N <sup>^</sup> C) ligands (upper, green) (b–d); FT-IR spectrum of ligand imphen (e). ....                                                                                                            | 25 |
| X-RAY STRUCTURAL ANALYSIS.....                                                                                                                                                                                                                                                                                                      | 26 |
| Table S1. Crystal data and structure refinement of 2. ....                                                                                                                                                                                                                                                                          | 26 |
| Table S2. Short intra- and intermolecular hydrogen bonds of complex 2. ....                                                                                                                                                                                                                                                         | 26 |
| Table S3. X–H•••Cg(J)(π-ring) interactions of complex 2. ....                                                                                                                                                                                                                                                                       | 27 |
| DFT CALCULATIONS .....                                                                                                                                                                                                                                                                                                              | 27 |
| Table S4. Comparison of theoretical (DFT/PBE1PBE/SDD/def2-TZVP) and experimental (X-Ray) bond lengths and angles for complex 2. The theoretical structures were fully optimized with use of spin-restricted (S <sub>0</sub> ) or unrestricted (T <sub>1</sub> ) DFT approach. ....                                                  | 27 |
| Table S5. Comparison of theoretical singlet and triplet-optimized bond lengths and angles for complexes 1, 3 and 4 (DFT/PBE1PBE/SDD/def2-TZVP). The structures were fully optimized with use of spin-restricted (S <sub>0</sub> ) or unrestricted (T <sub>1</sub> ) DFT approach.....                                               | 28 |

|                                                                                                                                                                                                                                                                                                                                                                                                                                                                               |    |
|-------------------------------------------------------------------------------------------------------------------------------------------------------------------------------------------------------------------------------------------------------------------------------------------------------------------------------------------------------------------------------------------------------------------------------------------------------------------------------|----|
| Figure S7. Selected molecular orbitals of 1, calculated with the Gaussian-16 software at TD-DFT/PBE1PBE/SDD/def2-TZVP level with the use of the PCM model at polarities corresponding to acetonitrile. ....                                                                                                                                                                                                                                                                   | 29 |
| Figure S8. Selected molecular orbitals of 2, calculated with the Gaussian-16 software at TD-DFT/PBE1PBE/SDD/def2-TZVP level with the use of the PCM model at polarities corresponding to acetonitrile. ....                                                                                                                                                                                                                                                                   | 30 |
| Figure S9. Selected molecular orbitals of 3, calculated with the Gaussian-16 software at TD-DFT/PBE1PBE/SDD/def2-TZVP level with the use of the PCM model at polarities corresponding to acetonitrile. ....                                                                                                                                                                                                                                                                   | 31 |
| Figure S10. Selected molecular orbitals of 4, calculated with the Gaussian-16 software at TD-DFT/PBE1PBE/SDD/def2-TZVP level with the use of the PCM model at polarities corresponding to acetonitrile. ....                                                                                                                                                                                                                                                                  | 32 |
| Figure S11. Percentage contribution of selected molecular fragments to the frontier molecular orbitals for complexes 1–4 according to DFT/PBE1PBE/SDD/def2-TZVP calculations with the use of the PCM model at polarities corresponding to acetonitrile.....                                                                                                                                                                                                                   | 33 |
| Table S6. Calculated electron transitions of complex 1, assigned to its experimental UV-Vis spectrum in acetonitrile. ....                                                                                                                                                                                                                                                                                                                                                    | 34 |
| Table S7. Calculated electron transitions of complex 2, assigned to its experimental UV-Vis spectrum in acetonitrile. ....                                                                                                                                                                                                                                                                                                                                                    | 35 |
| Table S8. Calculated electron transitions of complex 3, assigned to its experimental UV-Vis spectrum in acetonitrile. ....                                                                                                                                                                                                                                                                                                                                                    | 36 |
| Table S9. Calculated electron transitions of complex 4, assigned to its experimental UV-Vis spectrum in acetonitrile. ....                                                                                                                                                                                                                                                                                                                                                    | 37 |
| Table S10. Comparison of the experimental luminescence and theoretical DFT properties for complexes 1-4. The theoretical phosphorescence energies were calculated as the vertical energy difference between the ground singlet and triplet excited states $\Delta E_{T_1-S_0}$ using Gaussian-16 software with PBE0/SDD/def2-TZVP level. The solvent environment (acetonitrile) was taken into account by PCM equilibrium solvation within the linear response approach. .... | 38 |
| Figure S12. Spin density maps of complexes 1–4, calculated with the Gaussian-16 software at TD-DFT/PBE1PBE/SDD/def2-TZVP level with the use of the PCM equilibrium solvation within the linear response approach at polarities corresponding to acetonitrile. The wavefunctions used for computing the spin densities refer to the optimized geometries at the $T_1$ minima.....                                                                                              | 38 |
| ELECTROCHEMISTRY.....                                                                                                                                                                                                                                                                                                                                                                                                                                                         | 39 |
| Table S11. Electrochemical properties of ligands. ....                                                                                                                                                                                                                                                                                                                                                                                                                        | 39 |
| Figure S13. Cyclic voltammetry and differential pulse voltammetry of the complexes 1–4 and their respective cyclometalating ligands in the solution MeCN/ $\text{Bu}_4\text{NPF}_6$ ; scan rate $0.1 \text{ V} \cdot \text{s}^{-1}$ .....                                                                                                                                                                                                                                     | 40 |
| SPECTROSCOPY.....                                                                                                                                                                                                                                                                                                                                                                                                                                                             | 41 |
| Figure S14. UV-Vis spectra in dichloromethane ( $c = 10^{-5} \text{ M}$ , Inset: $c = 5 \times 10^{-4} \text{ M}$ ). ....                                                                                                                                                                                                                                                                                                                                                     | 41 |
| Table S12. The absorption maxima and molar extinction coefficients of compounds 1–4. ....                                                                                                                                                                                                                                                                                                                                                                                     | 41 |
| Figure S15. UV-Vis stability of Ir(III) complexes in MeCN. $c = 10^{-5} \text{ M}$ . ....                                                                                                                                                                                                                                                                                                                                                                                     | 42 |
| Figure S16. UV-Vis stability of Ir(III) complexes in $\text{CH}_2\text{Cl}_2$ . $c = 10^{-5} \text{ M}$ . ....                                                                                                                                                                                                                                                                                                                                                                | 43 |
| Figure S17. UV-Vis stability of Ir(III) complexes in DMSO. $c = 10^{-5} \text{ M}$ . ....                                                                                                                                                                                                                                                                                                                                                                                     | 44 |
| Figure S18. UV-Vis photostability of Ir(III) complexes upon 420 nm light irradiation in MeCN. $c = 10^{-5} \text{ M}$ . ....                                                                                                                                                                                                                                                                                                                                                  | 45 |

|                                                                                                                                                                                                                                                                                                                                                                                                                                                                                               |    |
|-----------------------------------------------------------------------------------------------------------------------------------------------------------------------------------------------------------------------------------------------------------------------------------------------------------------------------------------------------------------------------------------------------------------------------------------------------------------------------------------------|----|
| Figure S19. UV-Vis photostability of Ir(III) complexes upon 420 nm light irradiation in CH <sub>2</sub> Cl <sub>2</sub> . $c = 10^{-5}$ M. ....                                                                                                                                                                                                                                                                                                                                               | 46 |
| Figure S20. UV-Vis photostability of Ir(III) complexes upon 420 nm light irradiation in DMSO. $c = 10^{-5}$ M. ....                                                                                                                                                                                                                                                                                                                                                                           | 47 |
| Table S13. Summary of the absorption and luminescence properties of 1–4. ....                                                                                                                                                                                                                                                                                                                                                                                                                 | 48 |
| Figure S21. Summary of photoluminescence properties of complex 1. ....                                                                                                                                                                                                                                                                                                                                                                                                                        | 49 |
| Figure S22. Summary of photoluminescence properties of complex 2. ....                                                                                                                                                                                                                                                                                                                                                                                                                        | 50 |
| Figure S23. Summary of photoluminescence properties of complex 3. ....                                                                                                                                                                                                                                                                                                                                                                                                                        | 51 |
| Figure S24. Summary of photoluminescence properties of complex 4. ....                                                                                                                                                                                                                                                                                                                                                                                                                        | 52 |
| Figure S25. Emission spectra of Ir(III) complexes in argon-saturated and air-equilibrated dichloromethane and acetonitrile solutions upon excitation at 405 nm. ....                                                                                                                                                                                                                                                                                                                          | 53 |
| Figure S26. 77 K EtOH:MeOH (4:1 v/v) rigid matrix emission of complexes 1–4 (a), respective H(N <sup>∘</sup> C) ligands (b), and comparison of the phosphorescence of the complex in RT and in 77 K vs 77 K phosphorescence of their respective ligands (c-f). In panels (d-f) ligands Ph-quin, Ph-bztz and Py-bzth were additionally sensitized towards phosphorescence with addition of 10% (v:v) of ethylene iodide. ....                                                                  | 54 |
| Figure S27. Phosphorescence emission of compounds 1–4 (a) and their respective H(N <sup>∘</sup> C) ligands (b) in MeOH:EtOH (1:4 v:v) in 77 K, along with tangent lines computed by the linear fit of the high-energy side of the phosphorescence bands. Ligands Ph-quin, Ph-bztz and Py-bzth were additionally sensitized towards phosphorescence with addition of 10% (v:v) of ethylene iodide. ....                                                                                        | 55 |
| FEMTO- and NANOSECOND TRANSIENT ABSORPTION .....                                                                                                                                                                                                                                                                                                                                                                                                                                              | 56 |
| Figure S28. UV-Vis spectra of the acetonitrile solutions of 1–4 before and after their measurements of femtosecond transient absorption – photodamage test. ....                                                                                                                                                                                                                                                                                                                              | 56 |
| Figure S29. Summary of the global lifetime analysis of 1 (pump wavelength 355 nm; pump power 0.25 μJ per pulse, solvent: acetonitrile) containing evolution associated spectra (a), residual map (b), time traces at several wavelengths (c), and transient spectra (d). ....                                                                                                                                                                                                                 | 57 |
| Figure S30. Summary of the global lifetime analysis of 2 (pump wavelength 355 nm; pump power 0.25 μJ per pulse, solvent: acetonitrile) containing evolution associated spectra (a), residual map (b), time traces at several wavelengths (c), and transient spectra (d). ....                                                                                                                                                                                                                 | 58 |
| Figure S31. Summary of the global lifetime analysis of 3 (pump wavelength 355 nm; pump power 0.25 μJ per pulse, solvent: acetonitrile) containing evolution associated spectra (a), residual map (b), time traces at several wavelengths (c), and transient spectra (d). ....                                                                                                                                                                                                                 | 59 |
| Figure S32. Summary of the global lifetime analysis of 4 (pump wavelength 355 nm; pump power 0.25 μJ per pulse, solvent: acetonitrile) containing evolution associated spectra (a), residual map (b), time traces at several wavelengths (c), and transient spectra (d). ....                                                                                                                                                                                                                 | 60 |
| Figure S33. Transient triplet-triplet absorption spectrum (a) recorded at different times after excitation with a laser pulse at a wavelength of 355 nm and kinetic decay curve of triplet states with fitting recorded in aerated (b) and in de-aerated (c) conditions for compound 1. The decay curves were recorded at a wavelength of 510 nm which corresponding to the maximum of the transient absorption spectrum. Solvent: acetonitrile. ....                                         | 61 |
| Figure S34. Transient triplet-triplet absorption spectra (a,d) recorded at different times after excitation with a laser pulse at a wavelength of 355 nm and kinetic decay curve of triplet states with fitting recorded in aerated (b,e) and in de-aerated (c,f) conditions for compound 2 (upper) and ligand Ph-quin (lower). The decay curves were recorded at a wavelength of 415 nm which corresponding to the maximum of the transient absorption spectrum. Solvent: acetonitrile. .... | 62 |

|                                                                                                                                                                                                                                                                                                                                                                                                                                                                                               |    |
|-----------------------------------------------------------------------------------------------------------------------------------------------------------------------------------------------------------------------------------------------------------------------------------------------------------------------------------------------------------------------------------------------------------------------------------------------------------------------------------------------|----|
| Figure S35. Transient triplet-triplet absorption spectra (a,d) recorded at different times after excitation with a laser pulse at a wavelength of 355 nm and kinetic decay curve of triplet states with fitting recorded in aerated (b,e) and in de-aerated (c,f) conditions for compound 3 (upper) and ligand Ph-bztz (lower). The decay curves were recorded at a wavelength of 390 nm which corresponding to the maximum of the transient absorption spectrum. Solvent: acetonitrile. .... | 63 |
| Figure S36. Transient triplet-triplet absorption spectra (a,d) recorded at different times after excitation with a laser pulse at a wavelength of 355 nm and kinetic decay curve of triplet states with fitting recorded in aerated (b,e) and in de-aerated (c,f) conditions for compound 4 (upper) and ligand Py-bzth (lower). The decay curves were recorded at a wavelength of 395 nm which corresponding to the maximum of the transient absorption spectrum. Solvent: acetonitrile. .... | 64 |
| Figure S37. Comparison of decay associated spectra of 1–4 in 100 ps delay time and UV-Vis spectra in acetonitrile. ....                                                                                                                                                                                                                                                                                                                                                                       | 65 |
| REFERENCES .....                                                                                                                                                                                                                                                                                                                                                                                                                                                                              | 66 |

## EXPERIMENTAL DETAILS

NMR spectra were taken with use of Bruker Avance 500 NMR spectrometer in 298 K. DMSO- $d_6$  was used as solvent. For  $^1\text{H}$  NMR (registered in 500 MHz) and  $^{13}\text{C}\{^1\text{H}\}$  NMR (registered in 125 MHz) chemical shifts (in ppm) were referenced to residual signal of the solvent. Chemical shifts of  $^{31}\text{P}\{^1\text{H}\}$  NMR (registered in 202 MHz) were referenced to 85% phosphoric acid solution as external standard. In addition, multidimensional correlation NMR was taken: homonuclear  $^1\text{H}$ – $^1\text{H}$  2D COSY and heteronuclear  $^1\text{H}$ – $^{13}\text{C}\{^1\text{H}\}$  HMQC and HMBC (long-range) correlation spectra.

HRMS analyses were performed with use of Xevo G2 Q-TOF mass spectrometer (Waters) with an ESI ion source in positive and negative ion modes. The collection of data was performed from 100 to 1000 Da, scan time 0.5 s, in centroid mode, with the mass corrected using external reference (Lock-Spray<sup>TM</sup> leucine enkephalin solution, reference ion  $[\text{M}+\text{H}]^+$  at  $m/z$  556.2771 Da). Data analysis was performed with the MassLynx software (Waters) incorporated with the instrument.

FT-IR spectra were recorded with use of Nicolet iS5 FTIR spectrophotometer in the range 4000–400  $\text{cm}^{-1}$ . The samples were prepared in the form of KBr pellets.

Elemental analyses were performed with use of Elementar Vario EL Cube for C, H and N content.

The X-ray structural data of compound **2** were collected using four-circle diffractometer Gemini A Ultra (Oxford Diffraction) with CCD Atlas detector using graphite monochromated  $\text{MoK}\alpha$  radiation ( $\lambda = 0.71073 \text{ \AA}$ ). CrysAlis<sup>Pro</sup> software<sup>1</sup> was used to perform the data collection and reduction, while solving and refinement using direct methods and least square minimization was performed using SHELXS and SHELXL-2014 programs<sup>2–4</sup>. The non-hydrogen atoms were refined with anisotropic thermal parameters, while the hydrogen atoms were defined geometrically and refined with riding constraints:  $d(\text{C}–\text{H}) = 0.93 \text{ \AA}$ ,  $U_{\text{iso}}(\text{H}) = 1.2 U_{\text{eq}}(\text{C})$ . Crystallographic data in CIF format was deposited in the Cambridge Crystallographic Data Center, CCDC 2369644.

UV-Vis spectra were measured using ThermoScientific Evolution 220 spectrometer in dichloromethane and acetonitrile solutions. The kinetic stability studies were performed in dichloromethane, acetonitrile, and DMSO, and the UV-Vis spectra were monitored for 12 h, with spectra measured every two hours. The photostability studies were performed in dichloromethane, acetonitrile, and DMSO. The solutions of complexes were irradiated with

xenon light source at their respective low-energy excitation wavelengths for 120 min, and their UV-Vis spectra were measured every 20 min. Singlet oxygen generation ( $^1\text{O}_2$ ) efficiency was measured with use of the Evolution 220 UV-vis spectrometer in DMSO. 1,3-Diphenylisobenzofuran (DPBF) was used as a probe and  $[\text{Ru}(\text{bipy})_3](\text{PF}_6)_2$  was used as a standard reference sensitizer ( $\Phi_\Delta = 0.656$ )<sup>5</sup>. Concentrations of DPBF and sensitizers were adjusted so that the absorbances in the 420 nm irradiation wavelength were approximately 1.0 for DPBF and 0.2 for the sensitizers. The 1 cm path length cuvettes containing mixtures of DPBF and selected sensitizer were irradiated with 420 nm wavelength using xenon light source in 15 s intervals, and the UV-Vis absorbance spectra were measured.

The DFT and TD-DFT calculations were employed with no symmetry constraints to investigate optimized geometries of complexes **1–4**. The X-ray structural parameters of complex **2** were used as a starting point for the singlet ground-state optimization of all compounds, with modifications of the cyclometalating ligands performed in Chemcraft 1.8<sup>6</sup>. Vibrational frequency calculations were used to verify that the singlet ground state was in the minimum on the potential energy surface. All the further calculations were obtained based on the optimized geometries. PBE0 functional<sup>7,8</sup> with Stuttgart/Dresden Relativistic Small Core ECP basis set with the corresponding pseudopotentials<sup>9,10</sup> was used to treat the Ir atom (basis set input obtained from Basis Set Exchange Database<sup>11,12</sup>), whereas the def2-TZVP basis set was used for other elements<sup>13–15</sup>. Solvent effects for acetonitrile were taken into consideration using the polarized continuum model (PCM)<sup>16–18</sup> within the SCRF theory. All computations were performed with GAUSSIAN-16 rev. C.01<sup>19</sup> software package using resources provided by Wrocław Centre for Networking and Supercomputing (<http://wcss.pl>). Measurements of cyclic voltammetry (CV) and differential pulse voltammetry (DPV) were carried out using an Autolab PGSTAT 128N (Eco Chemie). A classic one-compartment, three-electrode cell system with GC working electrode (2 mm diam.), Ag/Ag<sup>+</sup> reference electrode and Pt wire counter electrode was used. All experiments were carried out in deoxygenated 1 mM solutions of the studied compound in the supporting electrolyte (0.1 M Bu<sub>4</sub>NPF<sub>6</sub> in MeCN). Scan rate was equal to 0.1 V v s<sup>-1</sup>, while the potential was calibrated against ferrocene.

The steady-state emission and excitation spectra were measured using FLS-980 fluorescence spectrophotometer (Edinburgh Instruments), with a 450 W Xe lamp as a light source and high-gain photomultiplier with 500 nm diffraction grating (Hamamatsu, R928P) as a detector. Measurements were carried out for the deaerated and aerated dichloromethane and acetonitrile solutions, and the deaeration was performed through argon purging of freshly prepared samples for 1 h. The 77 K emission spectra were recorded in an ethanol:methanol (4:1 v/v) matrix using liquid nitrogen to freeze the samples. The quantum yields of luminescence were measured on FLS-980 using an absolute method with integrating sphere. As a reference, respective solvents or Spectralon<sup>®</sup> standard were used. Calculations of the quantum yield were performed using FLS-980 software. The emission lifetime measurements were carried out on FLS-980 with TCSPC (using EPLED 405 nm diode as excitation source) or MCS (using 60 W microsecond Xe flash lamp as excitation source) methods. If needed, IRF was measured on the Ludox<sup>®</sup> solution. Calculations of the lifetimes were performed via FLS-980 software and the obtained decay curves were fitted using deconvolution or tail fit analysis.

The femtosecond transient absorption spectra were measured using a pump-probe transient absorption system (Ultrafast Systems, Helios) described in previous works<sup>20–22</sup>. The samples dissolved in MeCN were placed in 2 mm path length quartz cells equipped with

magnetic stirring and deaerated using 30 min argon-bubbling method. The concentration of the samples was chosen so that the ground state absorption in 355 nm excitation wavelength was about 0.5 (which corresponded to concentrations  $2.5 \times 10^{-4}$  M for **2** and **4** and  $5 \times 10^{-4}$  M for **1** and **3**). The obtained fs-TA data were prepared using Surface Xplorer (Ultrafast Systems) software: the background and scattered light were subtracted, and the coherent artifact analysis was performed for the corrections of the probe chirp. The global analysis of the TA maps was carried out using the linear unidirectional sequential model implemented in the Optimus<sup>TM</sup> software<sup>23</sup>. This analysis allowed us to perform the deconvolution of the transient spectra into evolution-associated spectra (EAS), providing the decay-associated spectra (DAS) as a linear combination of the EAS.

The triplet state lifetimes of the compounds were performed using a LKS 60 laser flash photolysis spectrometer (Applied Photophysics). A third harmonic nanosecond Nd-YAG laser with a wavelength of 355 nm (Brilliant) was used for sample excitation. Each laser pulse had a maximum power of 100 mJ, with an instantaneous power of 20 MW. Detection was achieved using a 150 W xenon lamp flash (OSRM XBO CR-OFR) coupled with a monochromator featuring a 1/1200 mm diffraction grating. Signal detection was performed using a photomultiplier. Compounds were dissolved in acetonitrile, exhibiting an absorbance of 0.2 at the 355 nm excitation wavelength. Triplet state kinetic decay curves were monitored at wavelengths corresponding to the maximum absorption determined from the triplet-triplet transition absorption spectrum specific to each compound. Measurements were carried out in a quartz cuvette with a 1 cm optical path length, maintaining room temperature equilibrium and near anaerobic conditions achieved by nitrogen purging for 30 minutes to eliminate oxygen. The kinetic decay curves were measured ten times for each sample. All decay profiles were analyzed using monoexponential fitting via LKS Pro-Data software.

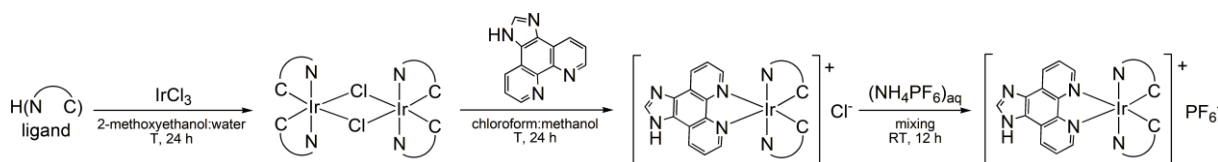

**Scheme S1.** Schematic of synthesis of complexes **1–4**.

# NMR SPECTRA

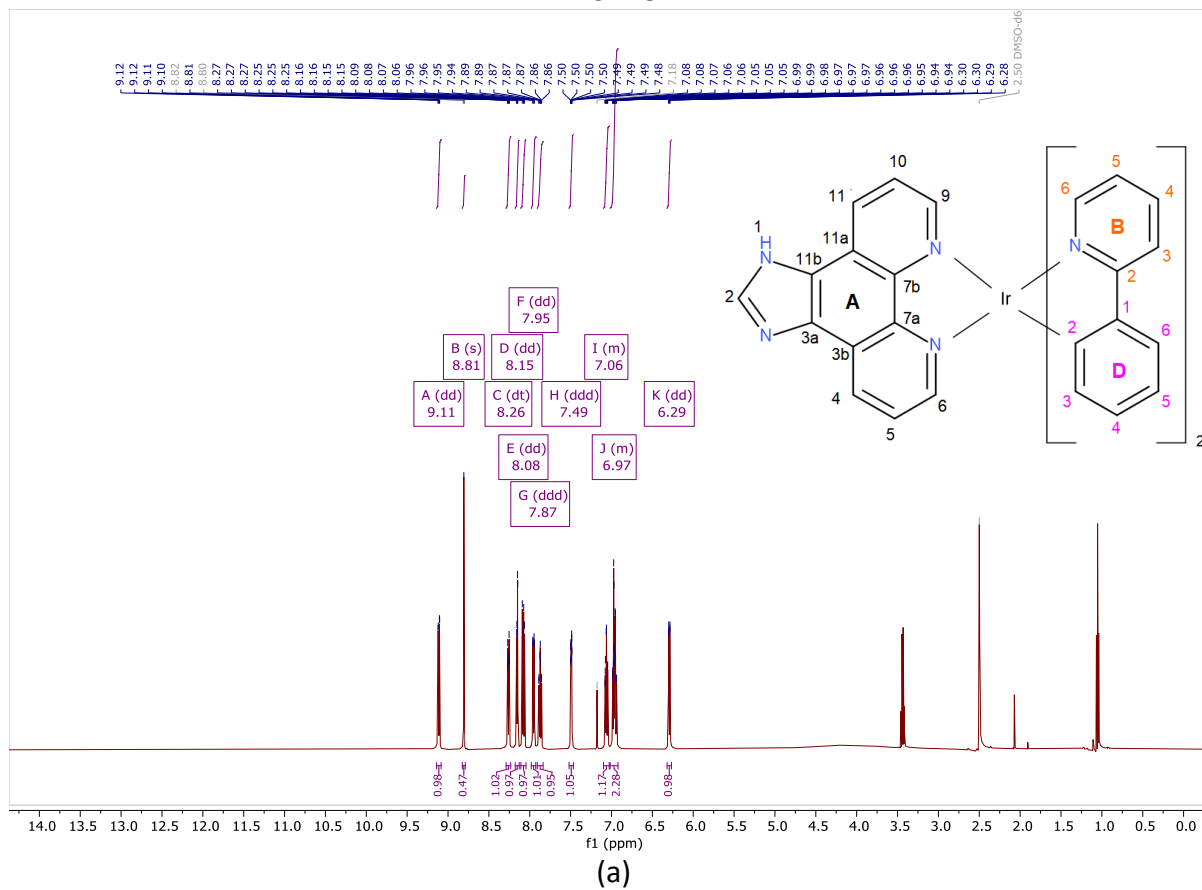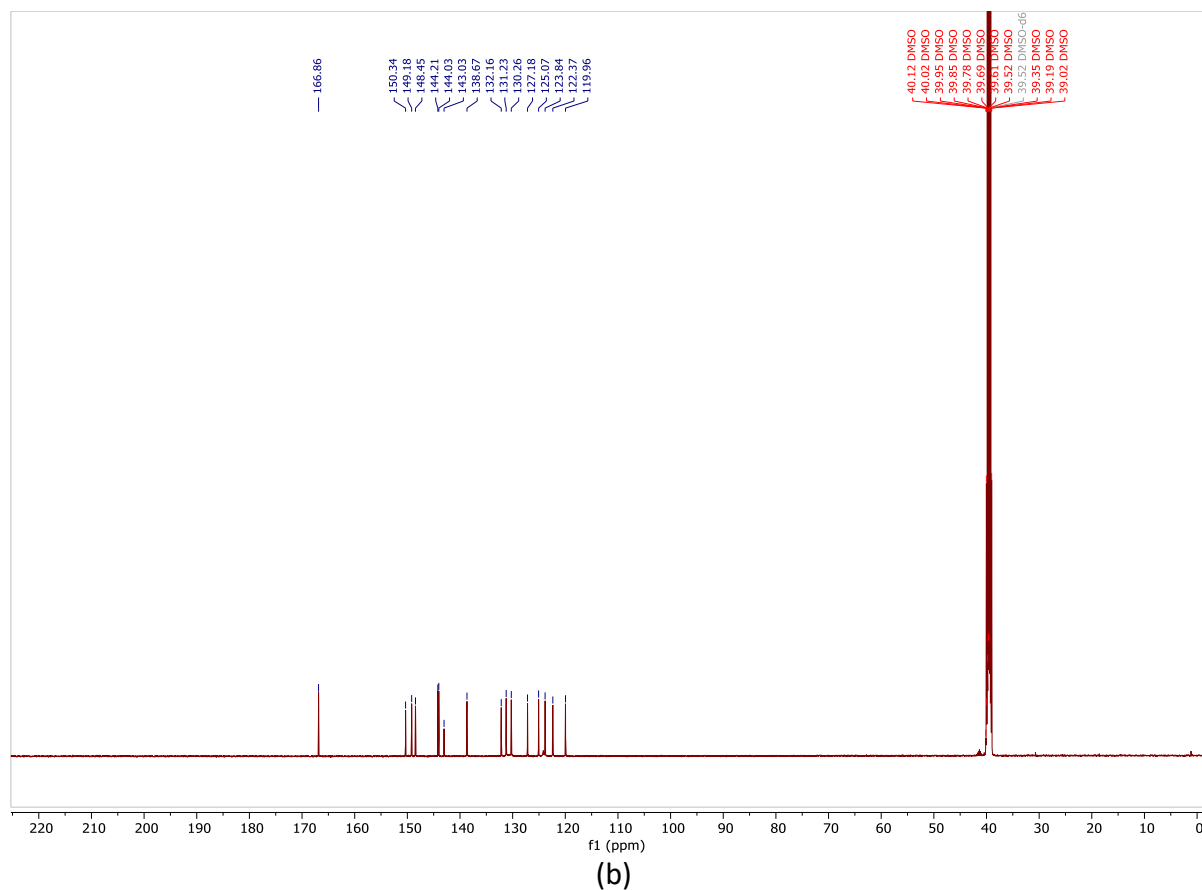

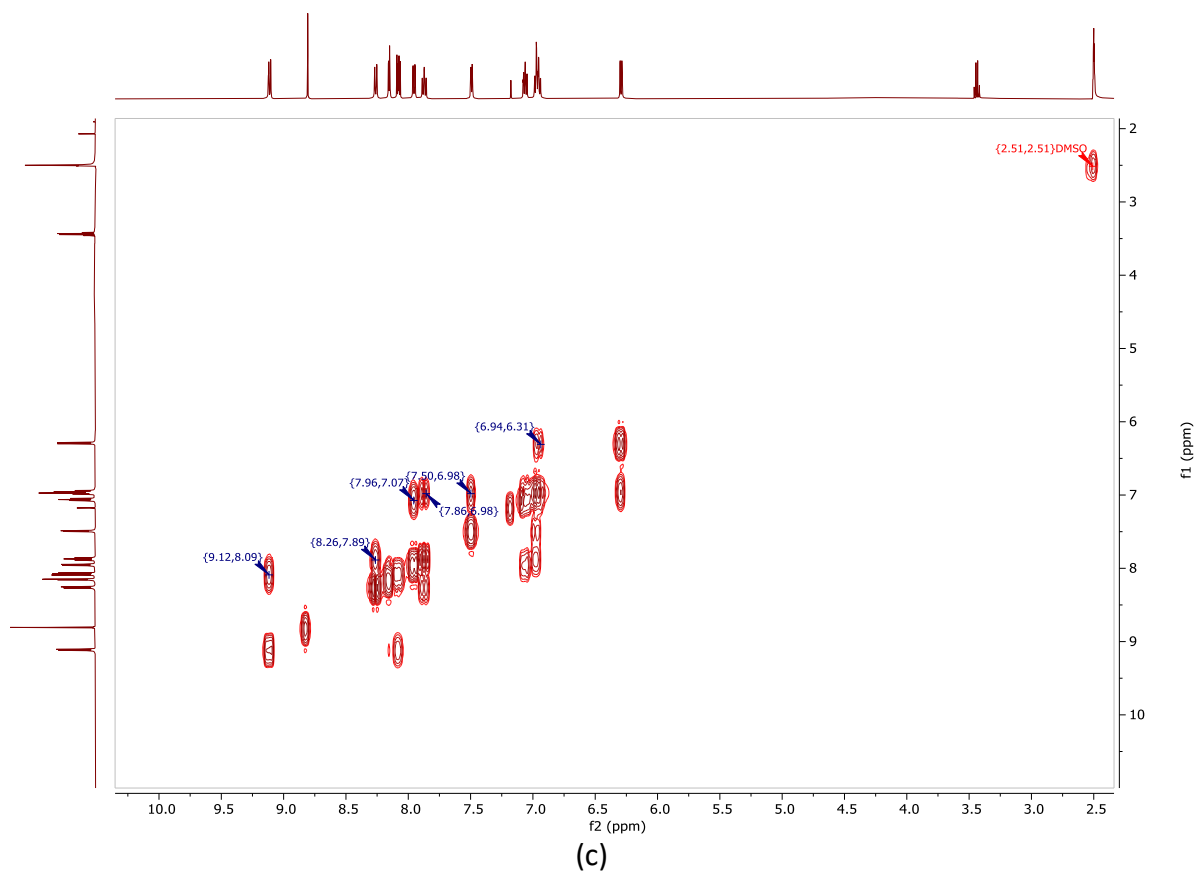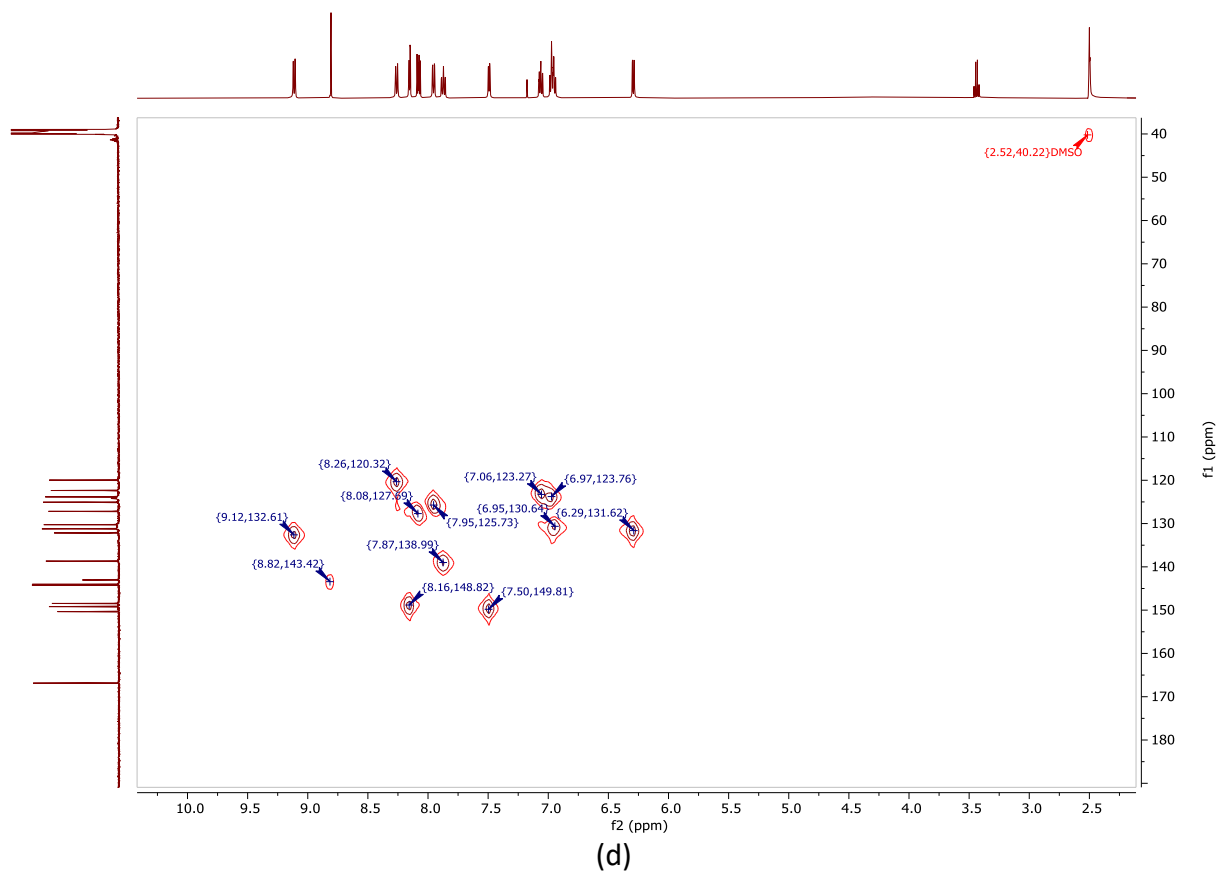

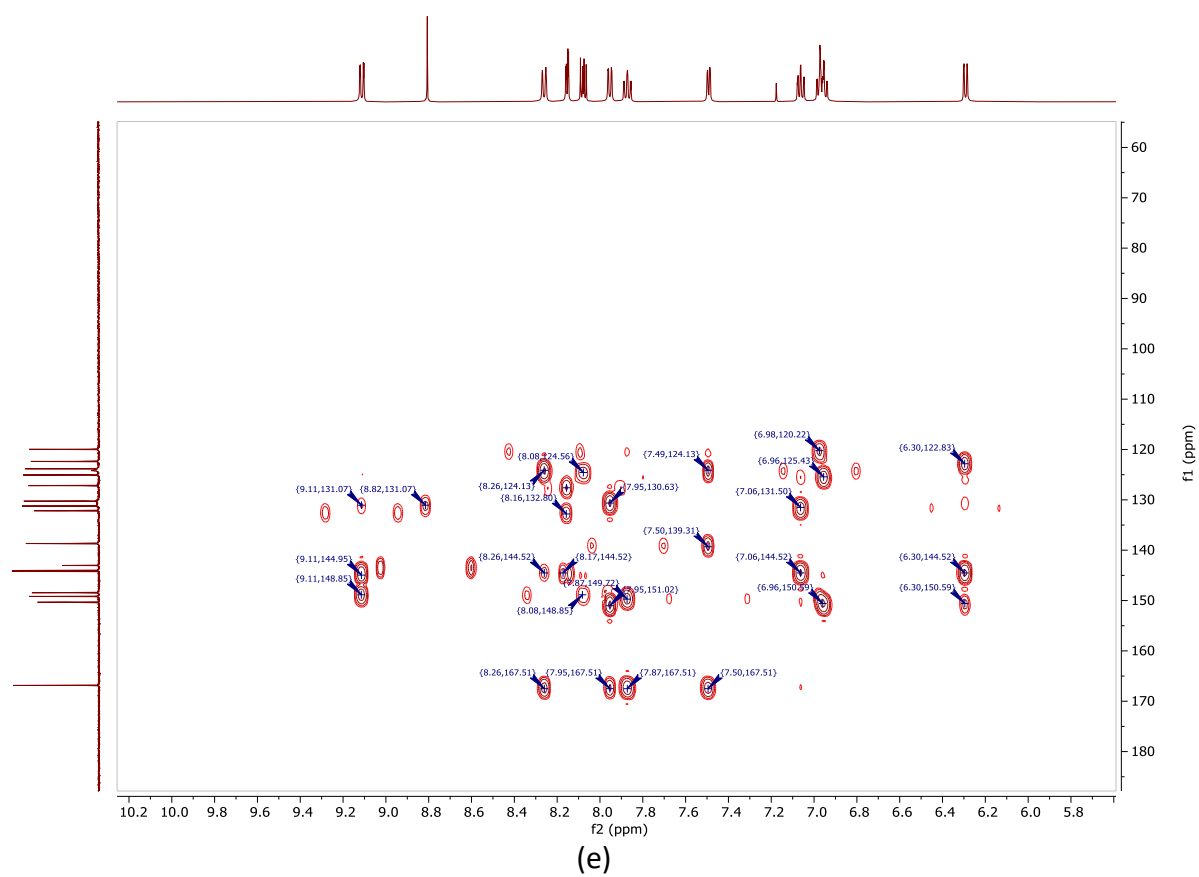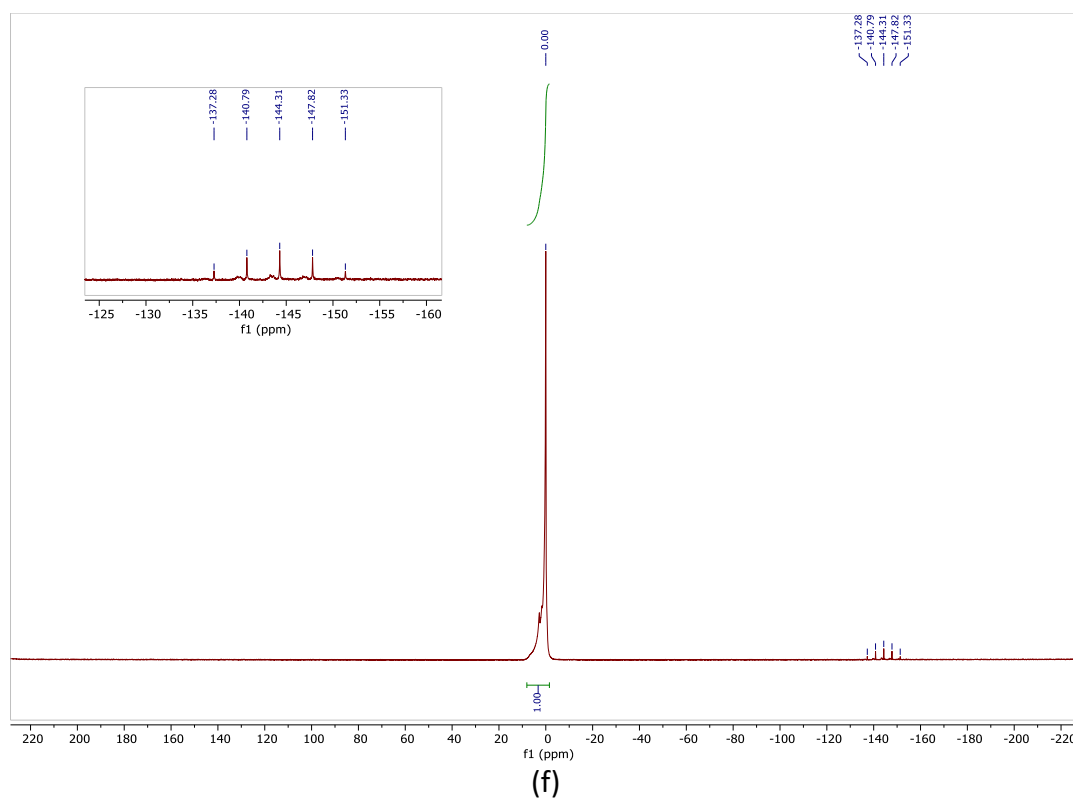

**Figure S1.**  $^1\text{H}$  (a),  $^{13}\text{C}\{^1\text{H}\}$  (b),  $^1\text{H}$ – $^1\text{H}$  COSY (c),  $^1\text{H}$ – $^{13}\text{C}\{^1\text{H}\}$  HMQC (d),  $^1\text{H}$ – $^{13}\text{C}\{^1\text{H}\}$  HMBC (e) and  $^{31}\text{P}\{^1\text{H}\}$  NMR (f) spectra of compound **1** in DMSO- $\text{d}_6$ .

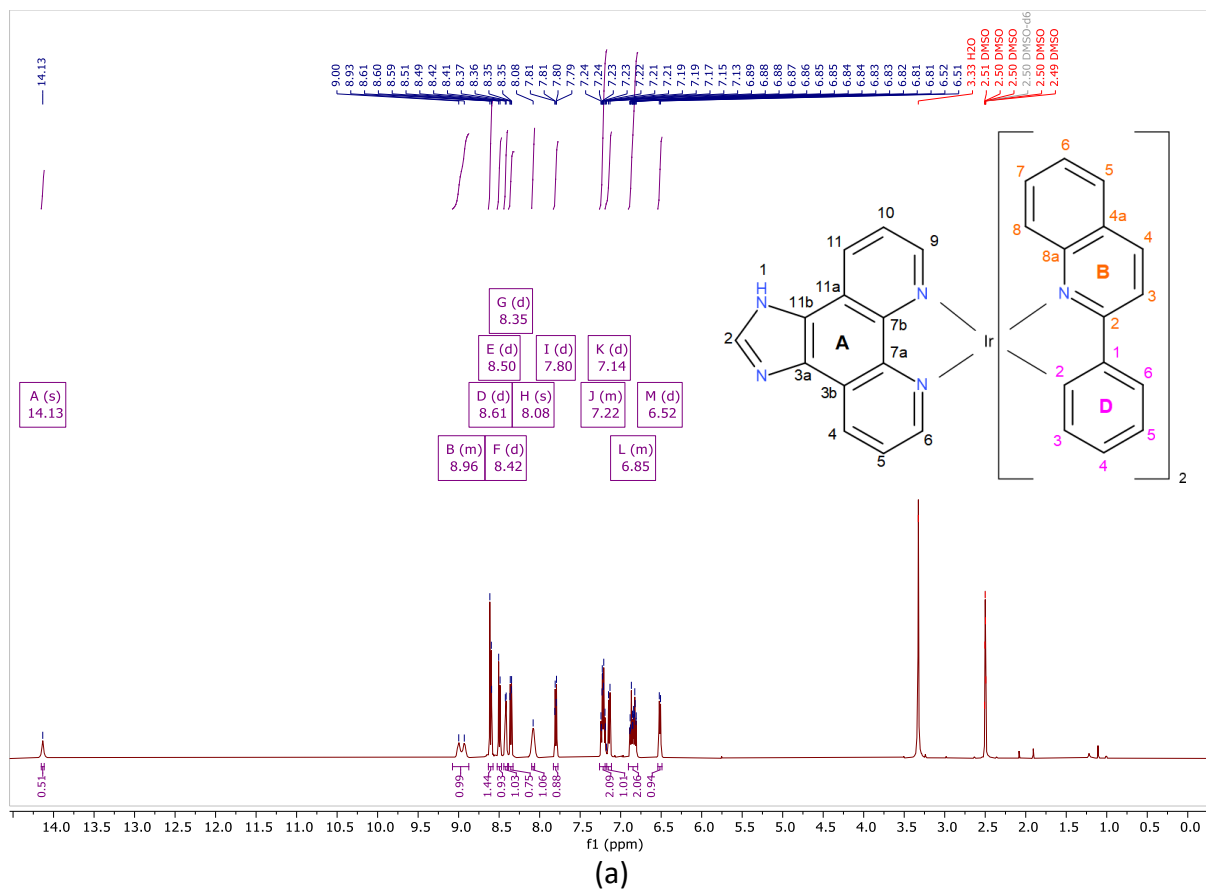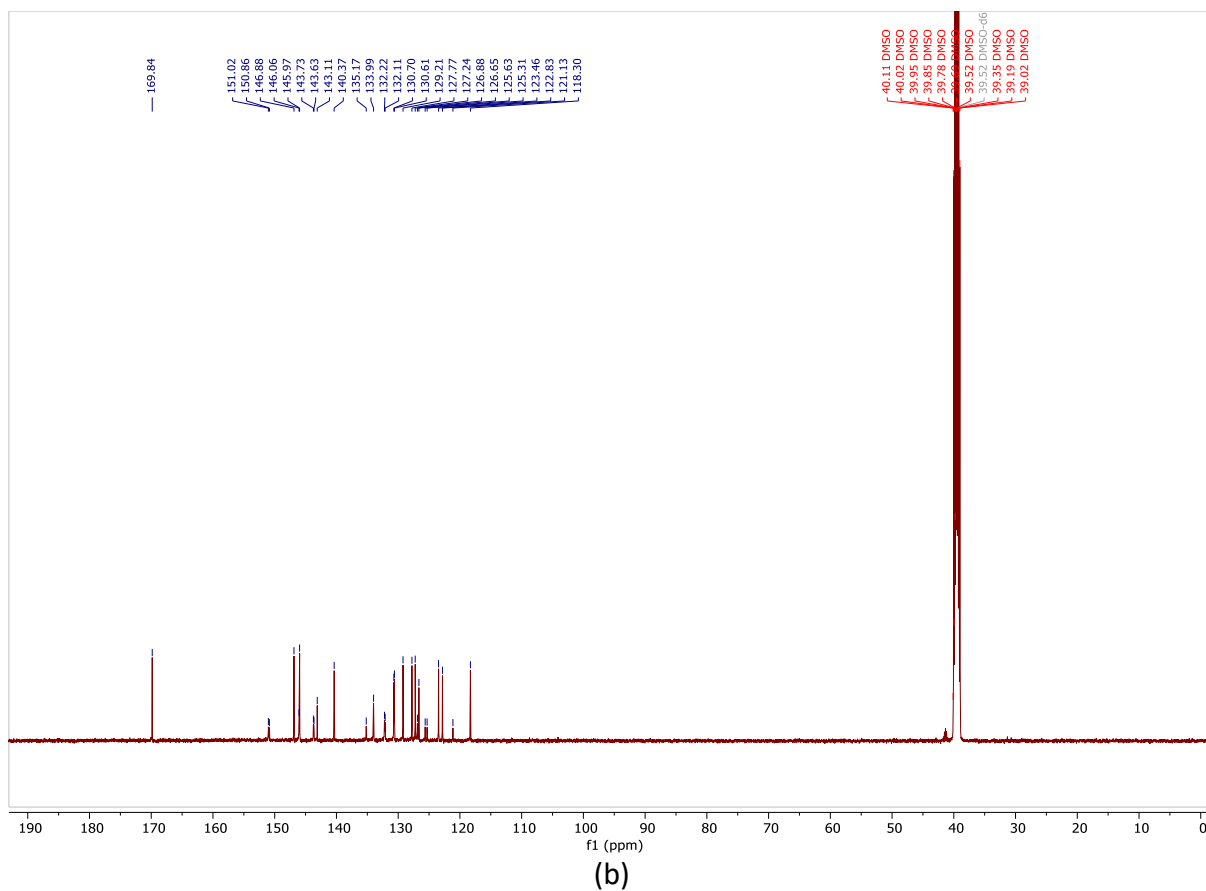

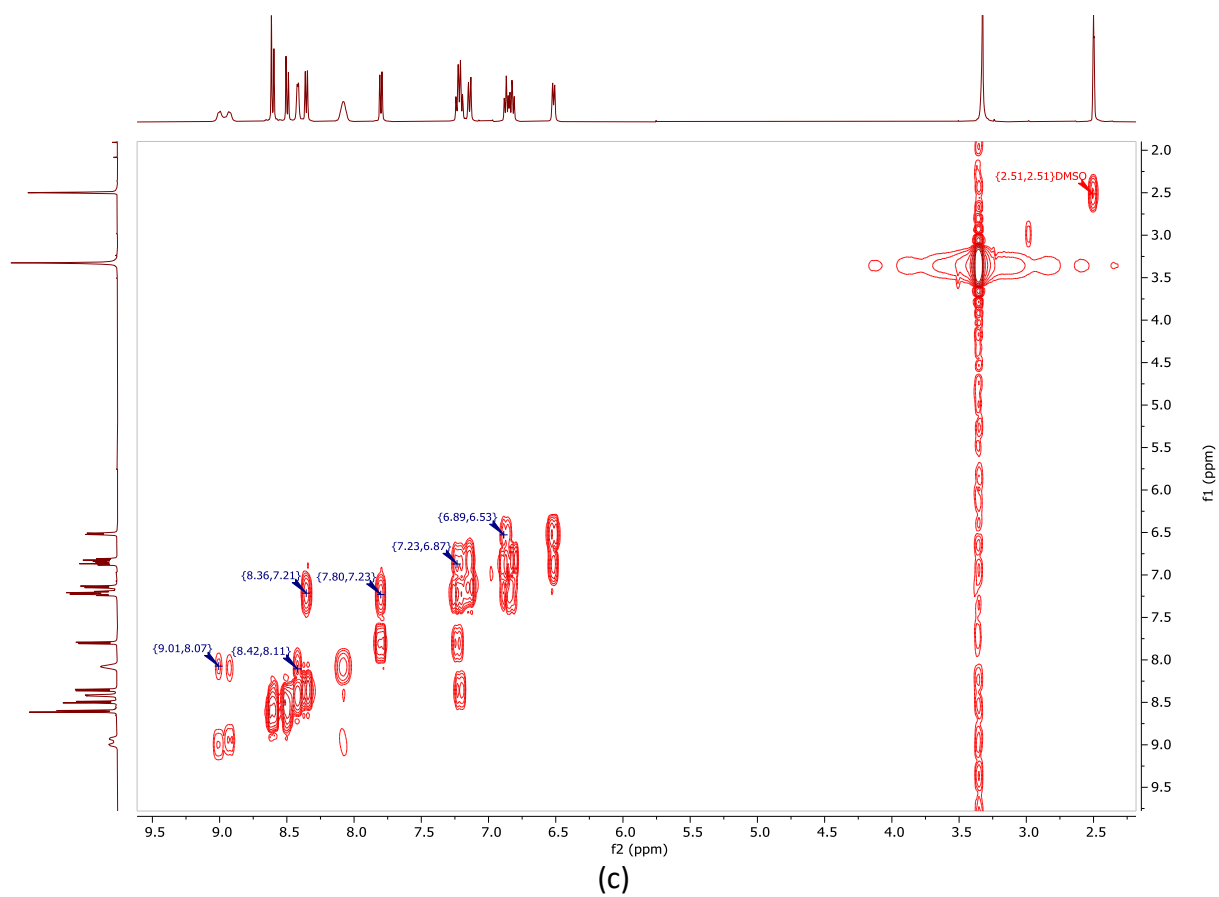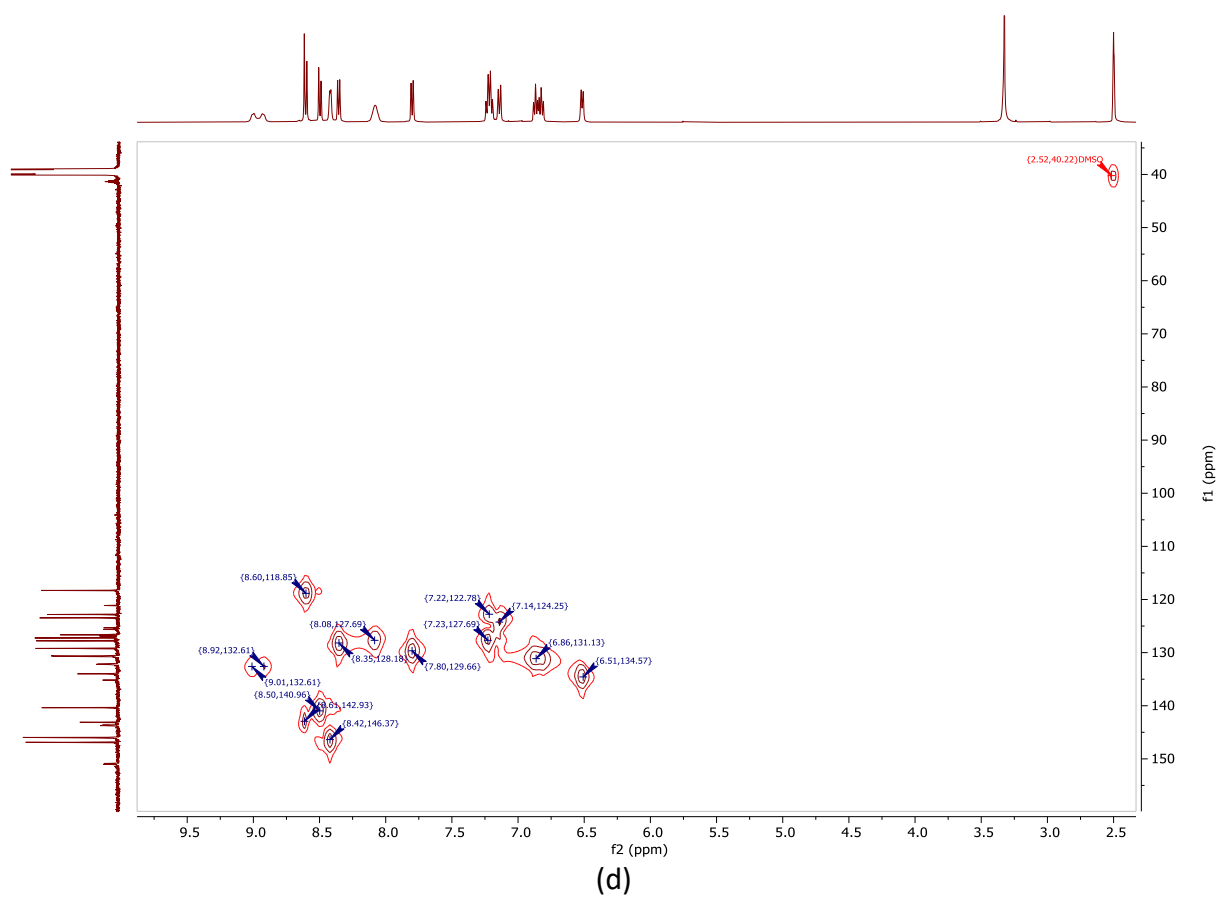

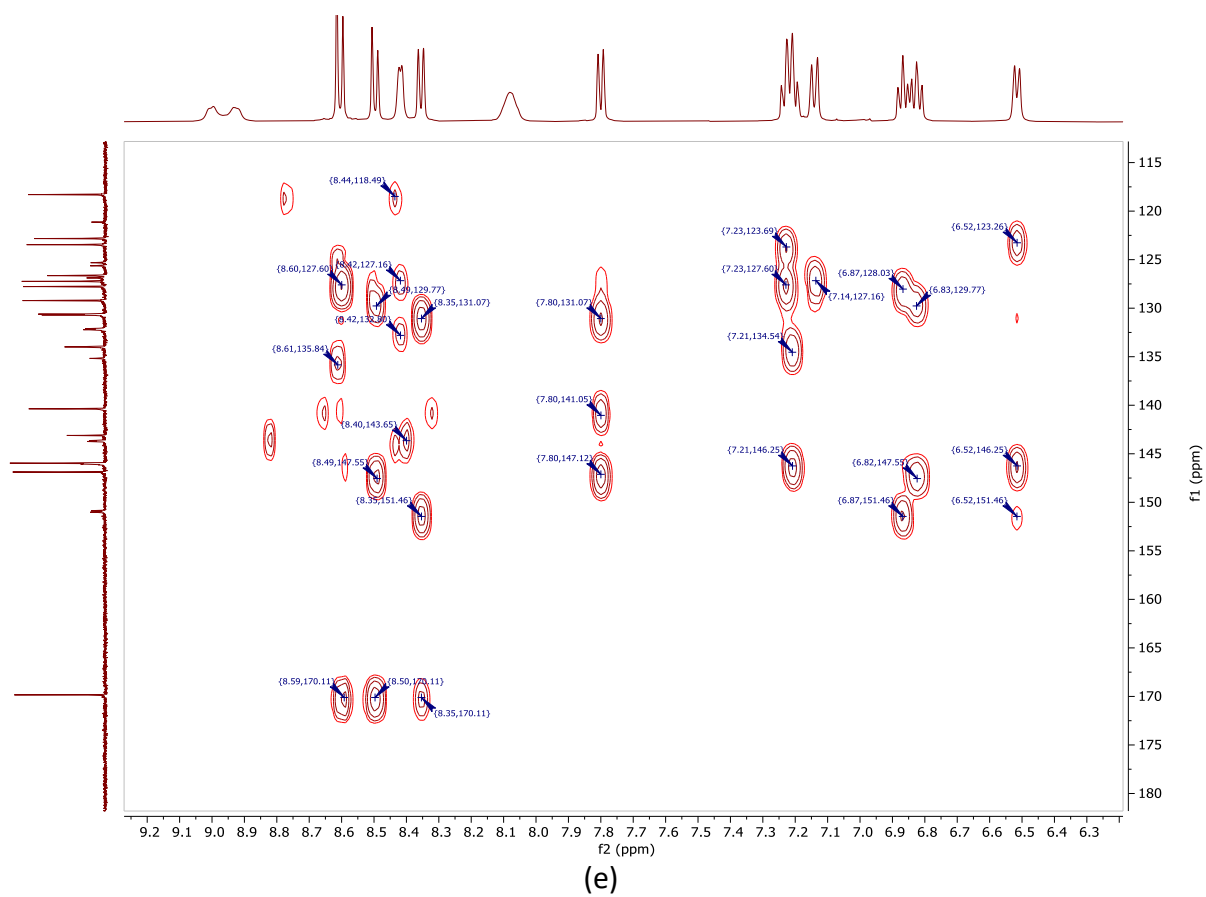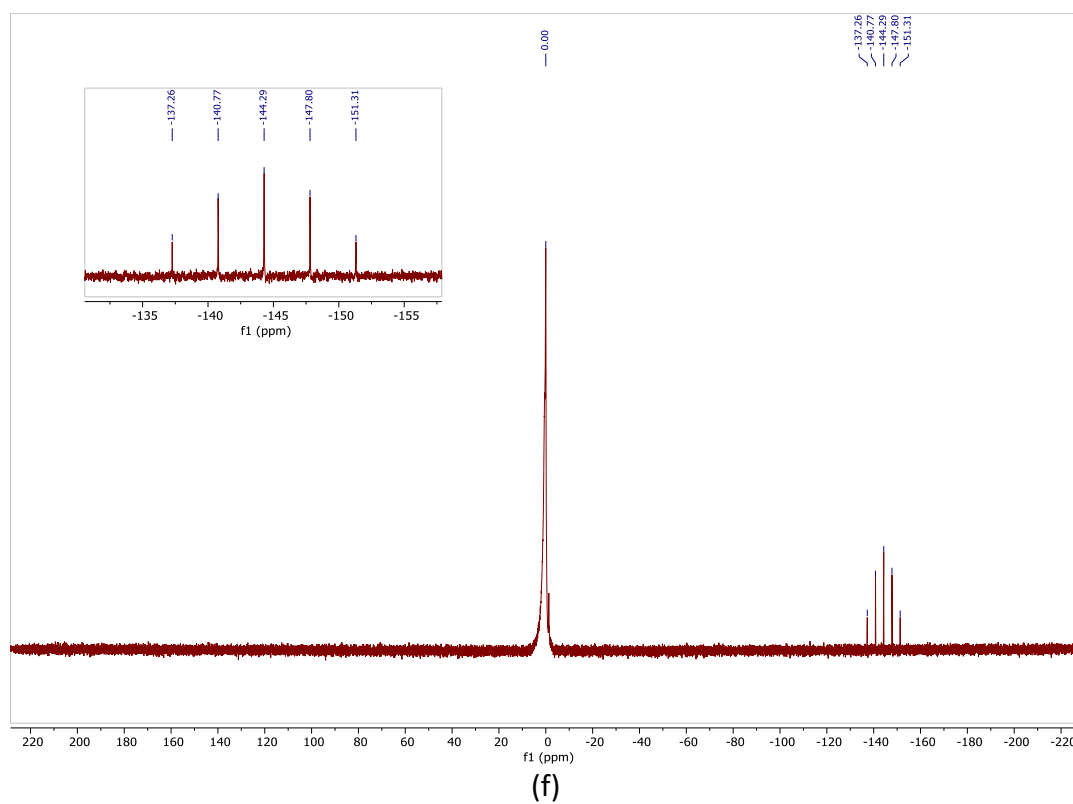

**Figure S2.**  $^1\text{H}$  (a),  $^{13}\text{C}\{^1\text{H}\}$  (b),  $^1\text{H}$ – $^1\text{H}$  COSY (c),  $^1\text{H}$ – $^{13}\text{C}\{^1\text{H}\}$  HMQC (d),  $^1\text{H}$ – $^{13}\text{C}\{^1\text{H}\}$  HMBC (e) and  $^{31}\text{P}\{^1\text{H}\}$  NMR (f) spectra of compound **2** in DMSO- $d_6$ .

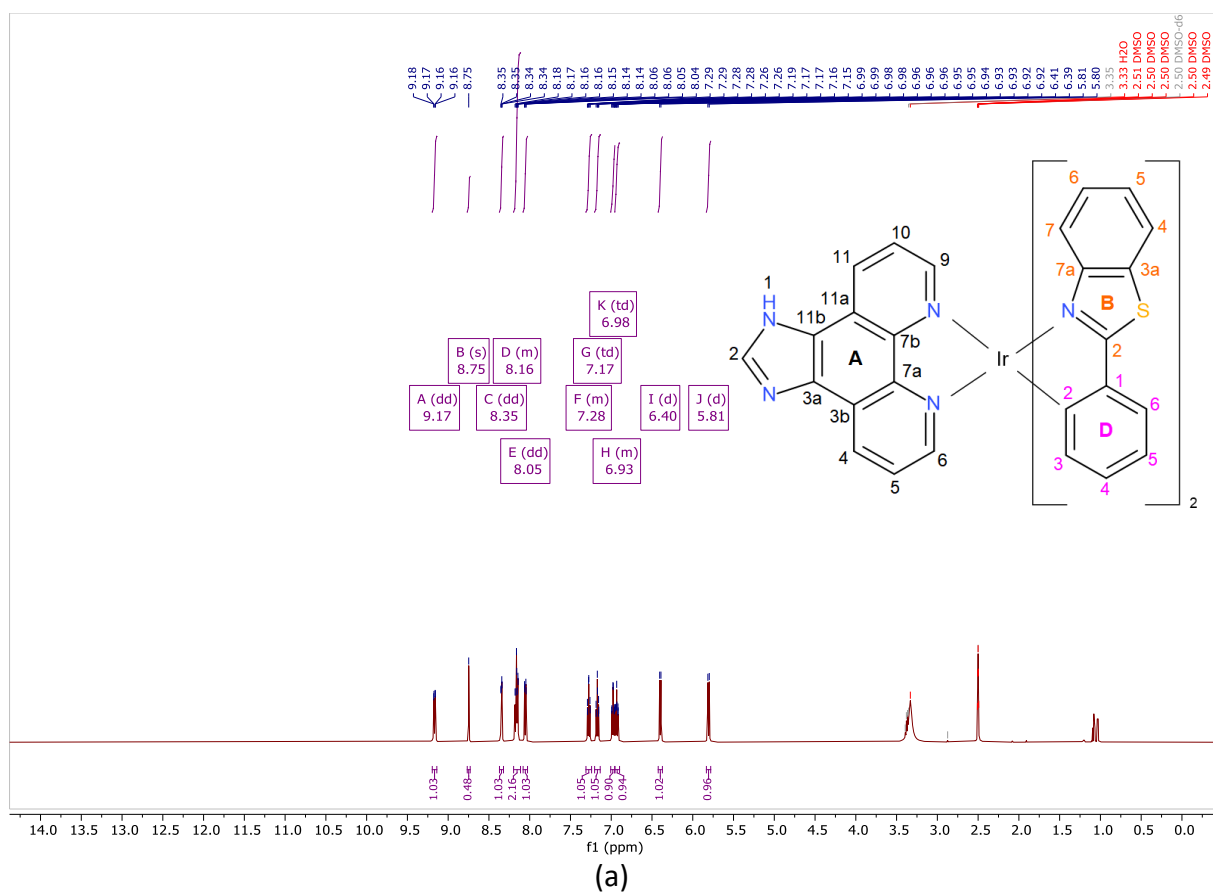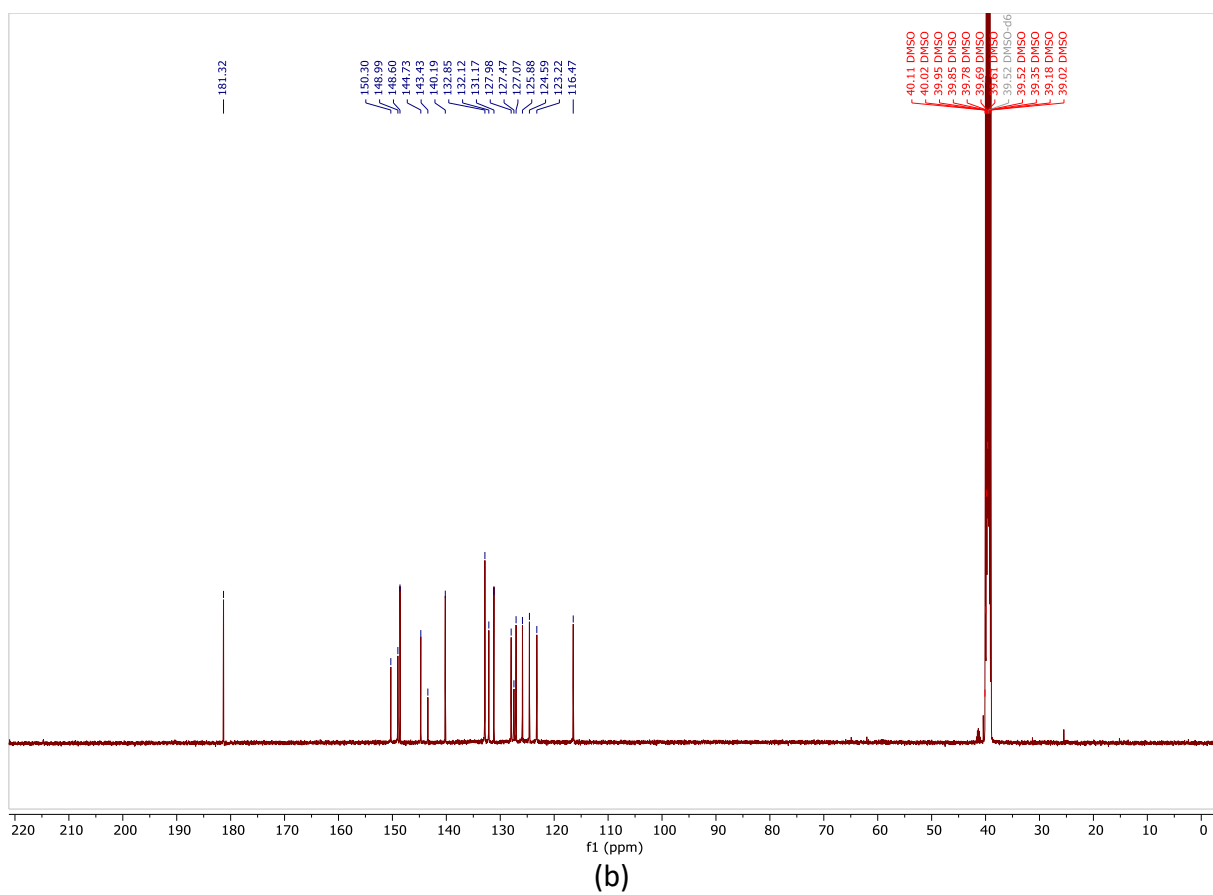

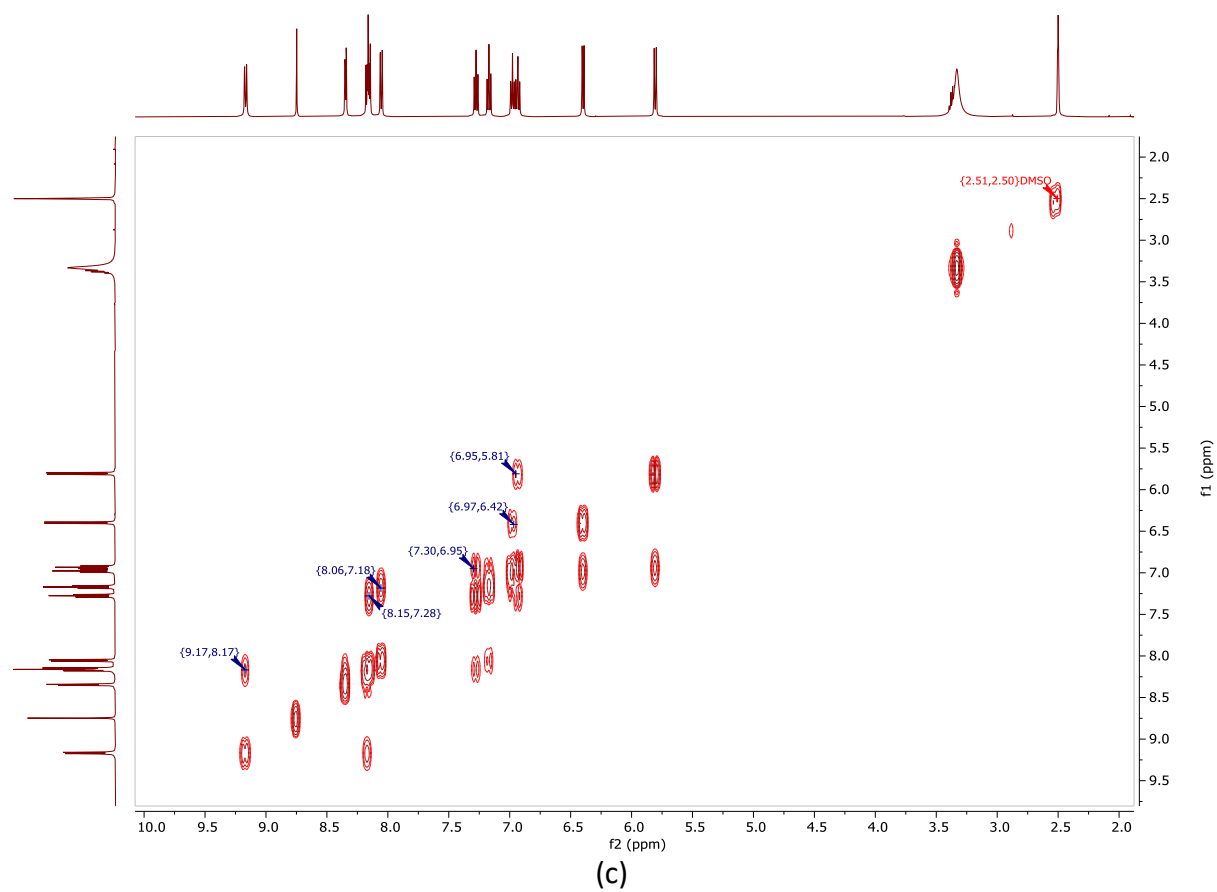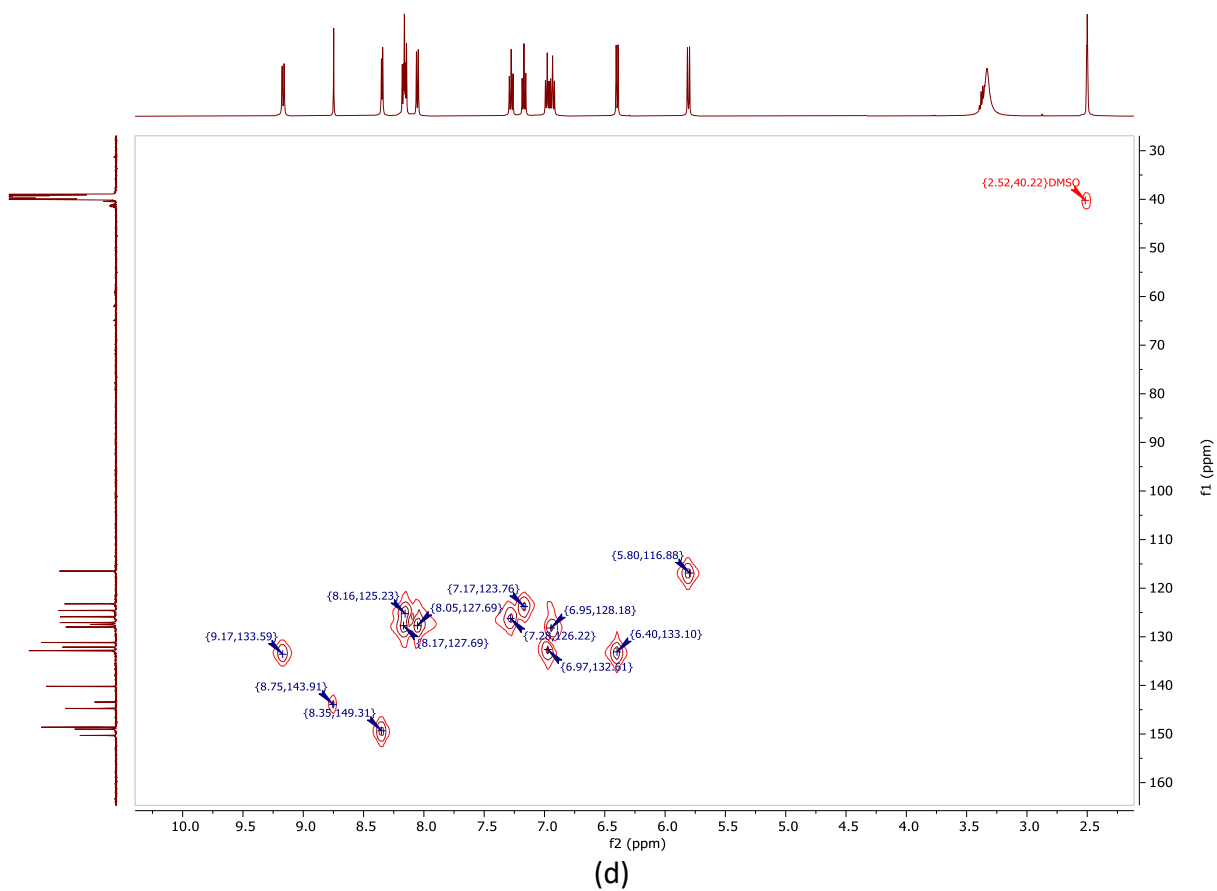

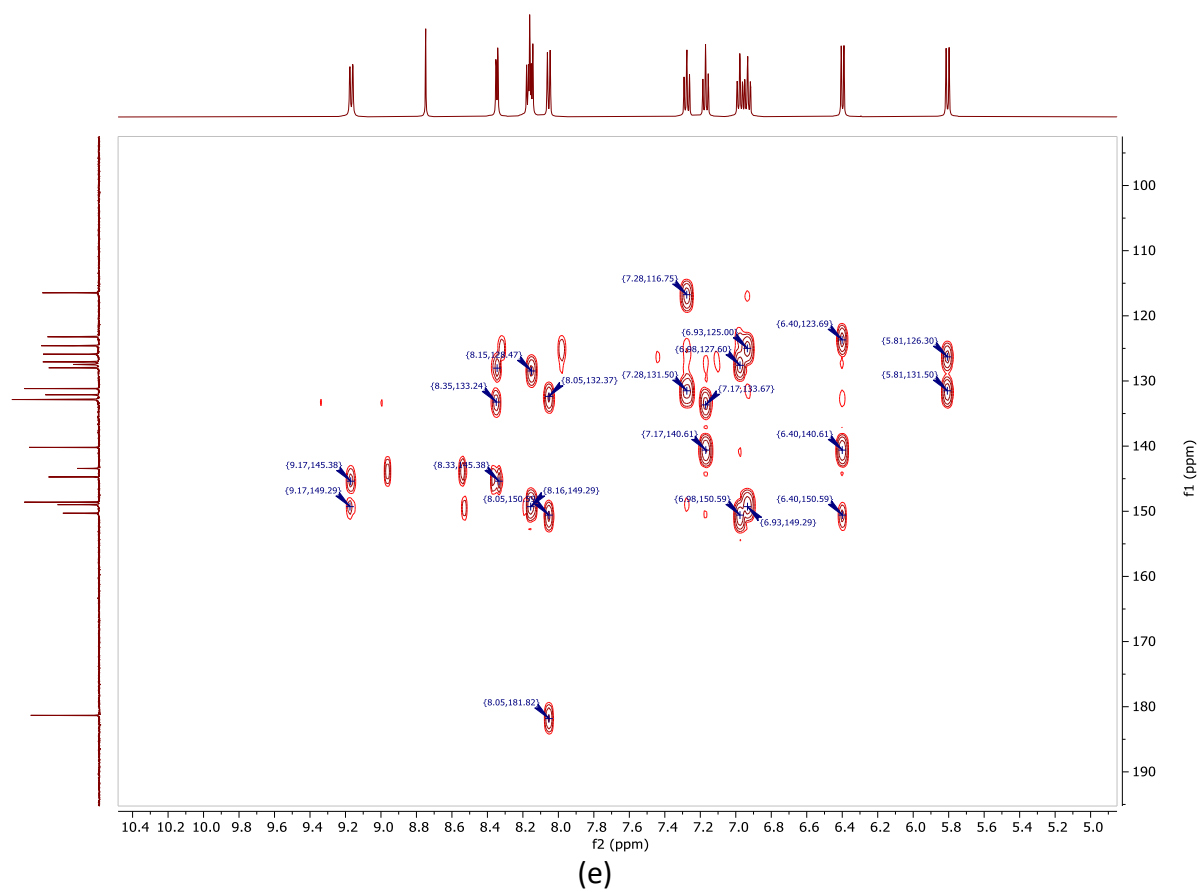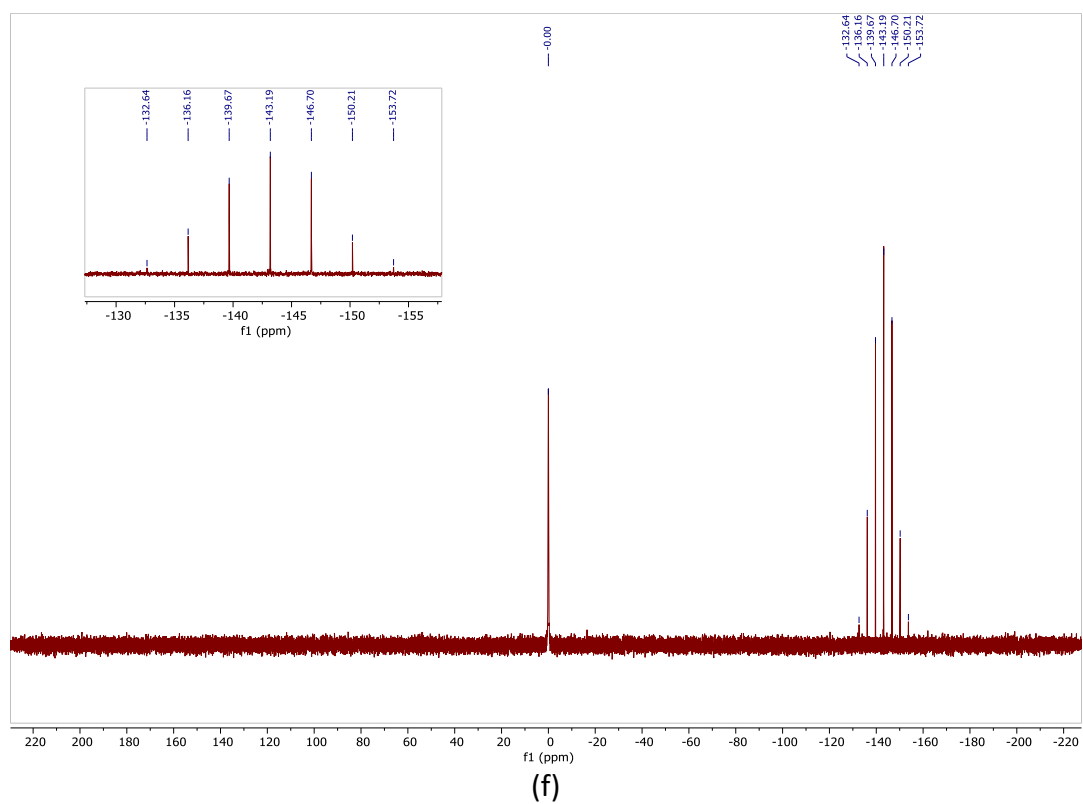

**Figure S3.**  $^1\text{H}$  (a),  $^{13}\text{C}\{^1\text{H}\}$  (b),  $^1\text{H}$ – $^1\text{H}$  COSY (c),  $^1\text{H}$ – $^{13}\text{C}\{^1\text{H}\}$  HMQC (d),  $^1\text{H}$ – $^{13}\text{C}\{^1\text{H}\}$  HMBC (e) and  $^{31}\text{P}\{^1\text{H}\}$  NMR (f) spectra of compound **3** in DMSO- $\text{d}_6$ .



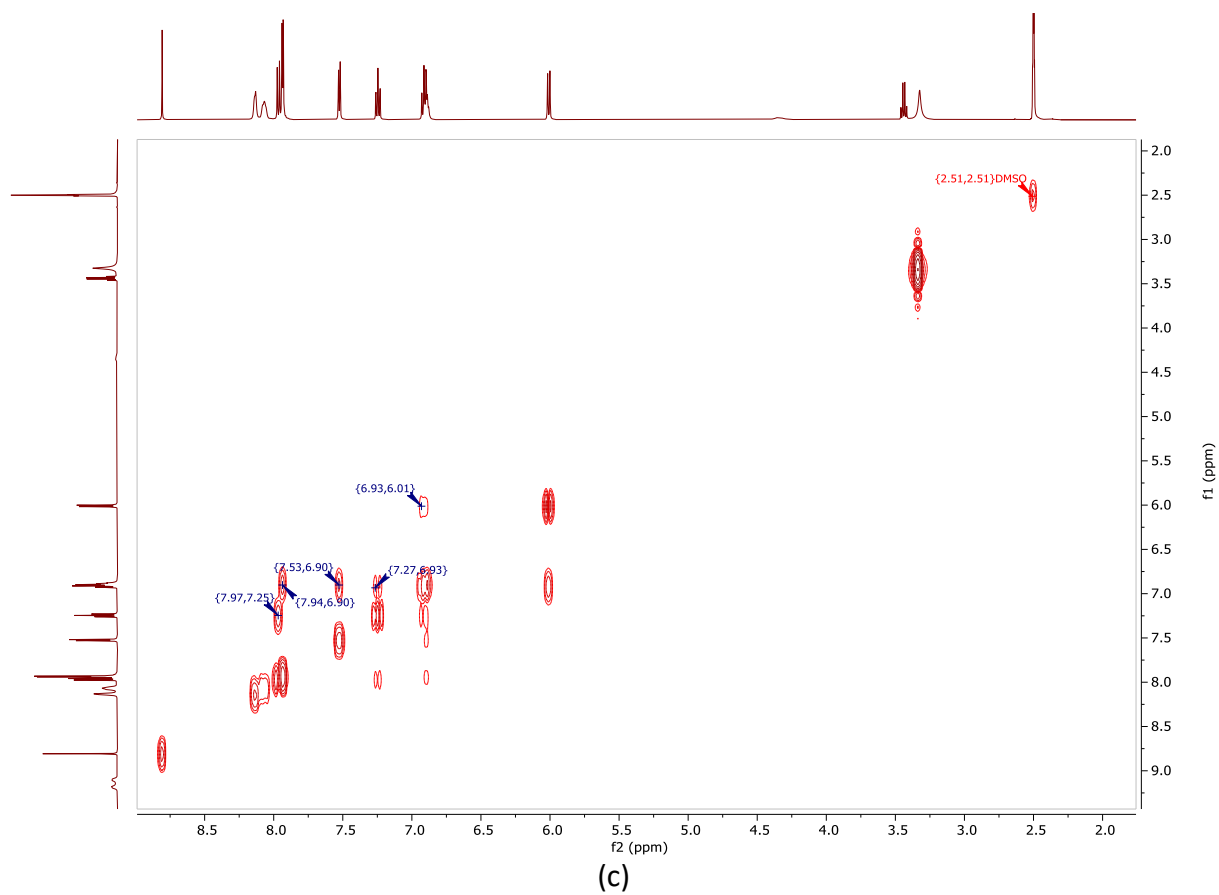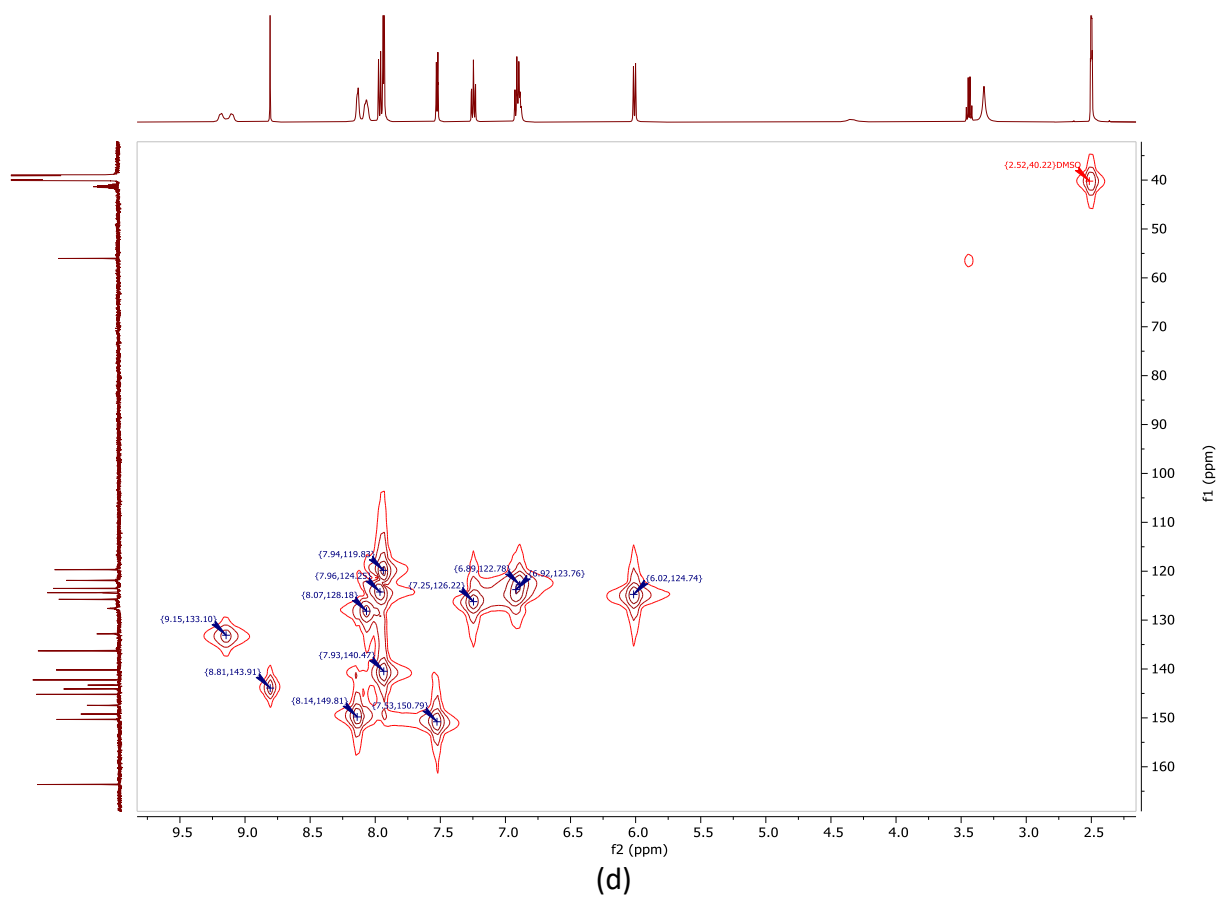

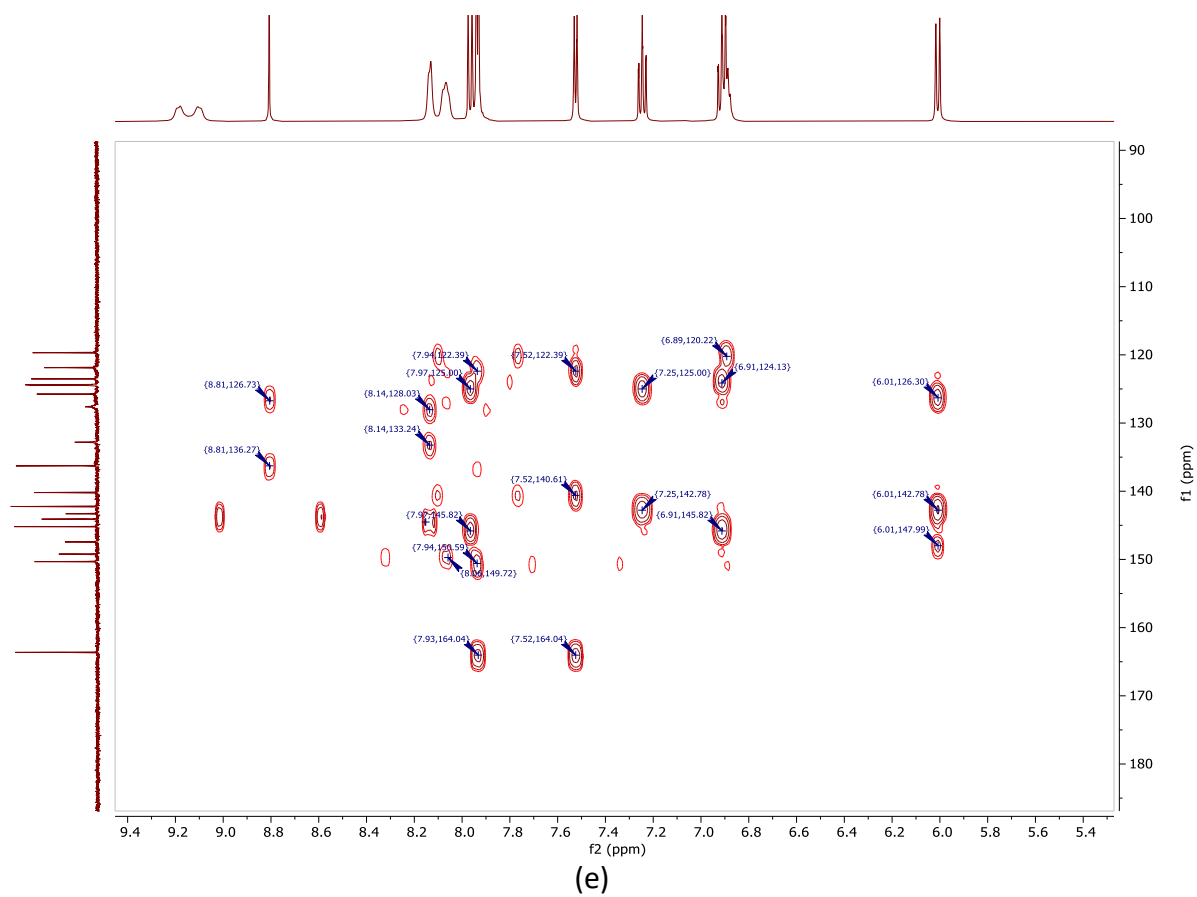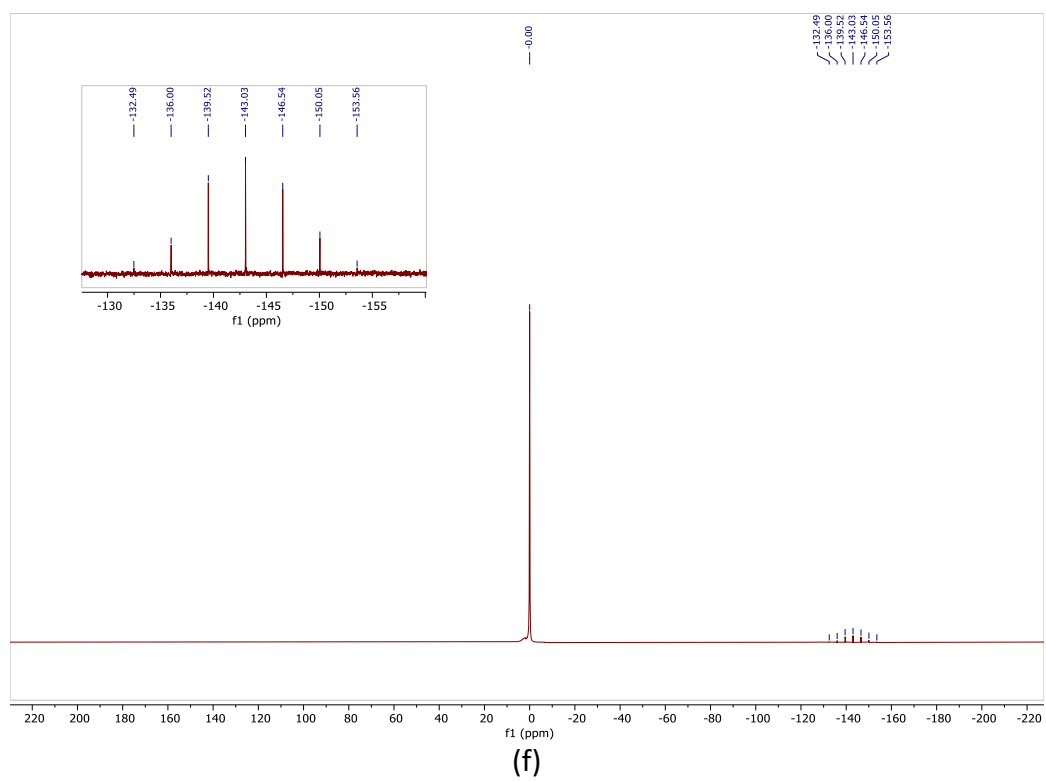

**Figure S4.**  $^1\text{H}$  (a),  $^{13}\text{C}\{^1\text{H}\}$  (b),  $^1\text{H}$ – $^1\text{H}$  COSY (c),  $^1\text{H}$ – $^{13}\text{C}\{^1\text{H}\}$  HMQC (d),  $^1\text{H}$ – $^{13}\text{C}\{^1\text{H}\}$  HMBC (e) and  $^{31}\text{P}\{^1\text{H}\}$  NMR (f) spectra of compound **4** in  $\text{DMSO-d}_6$ .

## HRMS SPECTRA

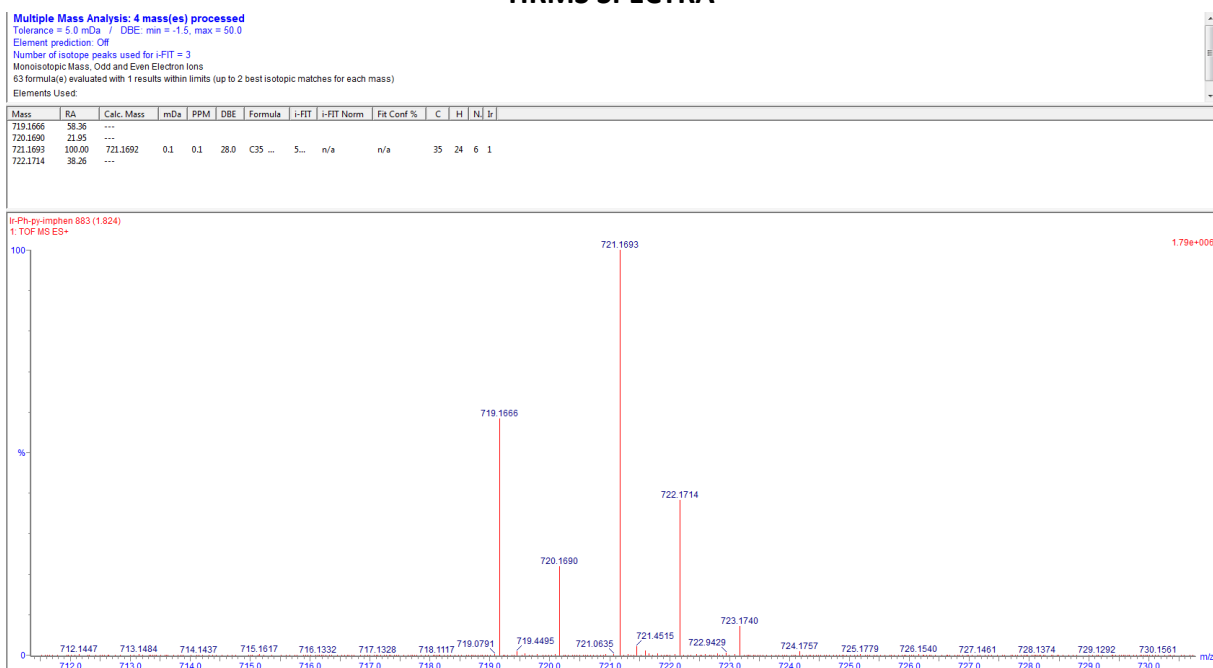

**1 HRMS (ESI, positive mode): calcd for C<sub>35</sub>H<sub>24</sub>IrN<sub>6</sub><sup>+</sup> 721.1692 found 721.1693**

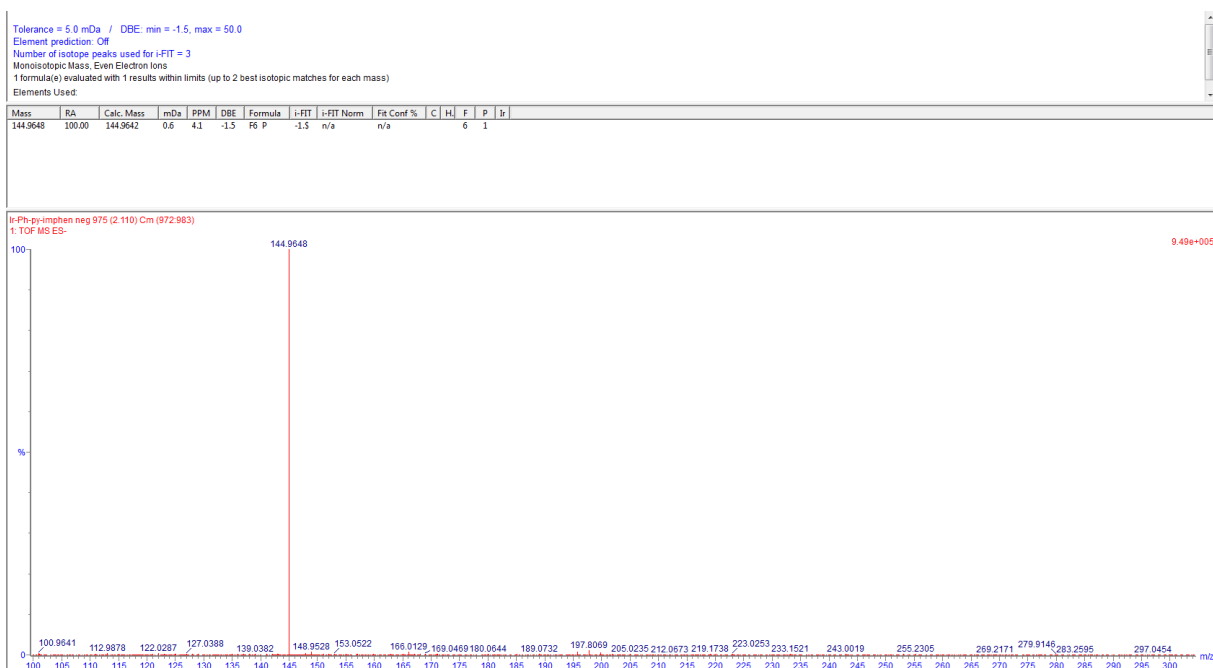

**1 HRMS (ESI, negative mode): calcd for PF<sub>6</sub><sup>-</sup> 144.9642 found 144.9648**

(a)

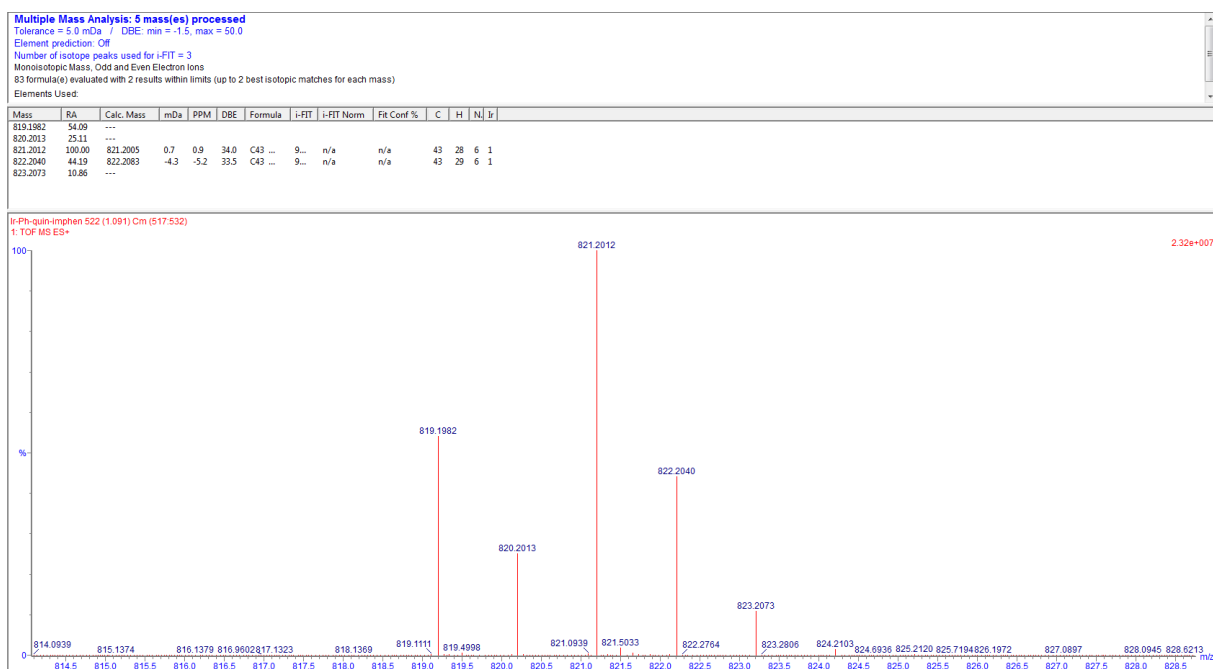

**2 HRMS (ESI, positive mode):** calcd for C<sub>43</sub>H<sub>28</sub>IrN<sub>6</sub><sup>+</sup> 821.2005 found 821.2012

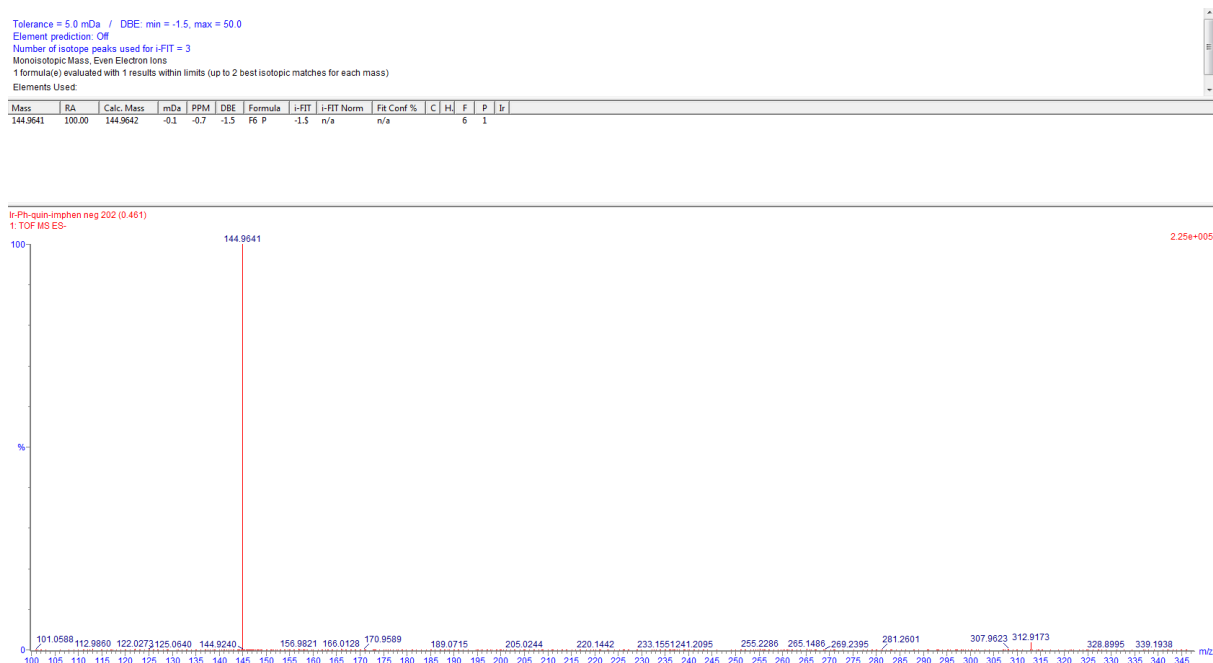

**2 HRMS (ESI, negative mode):** calcd for PF<sub>6</sub><sup>-</sup> 144.9642 found 144.9641

(b)

**Multiple Mass Analysis: 5 mass(es) processed**

Tolerance = 5.0 mDa / DBE: min = -1.5, max = 50.0

Element prediction: Off

Number of isotope peaks used for i-FIT = 3

Monoisotopic Mass, Odd and Even Electron Ions

84 formula(e) evaluated with 2 results within limits (up to 2 best isotopic matches for each mass)

Elements Used:

| Mass     | RA     | Calc. Mass | mDa  | PPM  | DBE  | Formula             | i-FIT | i-FIT Norm | Fit Conf % | C   | H   | N   | S   | Ir  |
|----------|--------|------------|------|------|------|---------------------|-------|------------|------------|-----|-----|-----|-----|-----|
| 831.1113 | 54.24  | ---        | ---  | ---  | ---  | ---                 | ---   | ---        | ---        | --- | --- | --- | --- | --- |
| 832.1140 | 24.00  | ---        | ---  | ---  | ---  | ---                 | ---   | ---        | ---        | --- | --- | --- | --- | --- |
| 833.1138 | 100.00 | 833.1133   | 0.5  | 0.6  | 32.0 | C <sub>39</sub> ... | 7...  | n/a        | n/a        | 39  | 24  | 6   | 2   | 1   |
| 834.1163 | 44.46  | 834.1211   | -4.8 | -5.8 | 31.5 | C <sub>39</sub> ... | 7...  | n/a        | n/a        | 39  | 25  | 6   | 2   | 1   |
| 835.1147 | 18.12  | ---        | ---  | ---  | ---  | ---                 | ---   | ---        | ---        | --- | --- | --- | --- | --- |

Ir-Ph-bdtz-imphen 430 (0.893) Cm (429.433)

1. TOF MS ES+

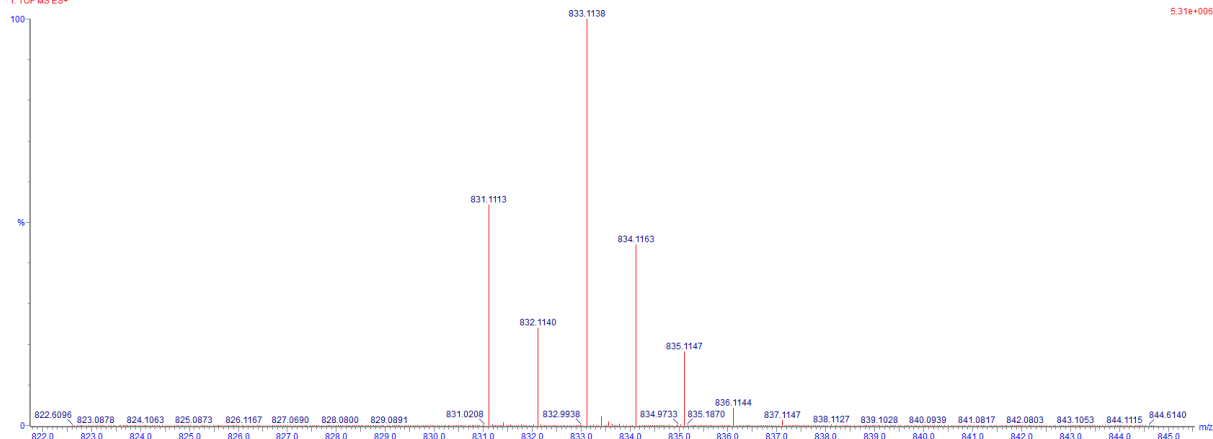**3 HRMS (ESI, positive mode): calcd for C<sub>39</sub>H<sub>24</sub>IrN<sub>6</sub>S<sub>2</sub><sup>+</sup> 833.1133 found 833.1138**

Tolerance = 5.0 mDa / DBE: min = -1.5, max = 50.0

Element prediction: Off

Number of isotope peaks used for i-FIT = 3

Monoisotopic Mass, Even Electron Ions

1 formula(e) evaluated with 1 results within limits (up to 2 best isotopic matches for each mass)

Elements Used:

| Mass     | RA     | Calc. Mass | mDa | PPM | DBE  | Formula          | i-FIT | i-FIT Norm | Fit Conf % | C | H | F   | P   | Ir  |
|----------|--------|------------|-----|-----|------|------------------|-------|------------|------------|---|---|-----|-----|-----|
| 144.9642 | 100.00 | 144.9642   | 0.0 | 0.0 | -1.5 | F <sub>6</sub> P | -1.5  | n/a        | n/a        | 6 | 1 | --- | --- | --- |

Ir-Ph-bdtz-imphen neg 114 (0.273)

1. TOF MS ES-

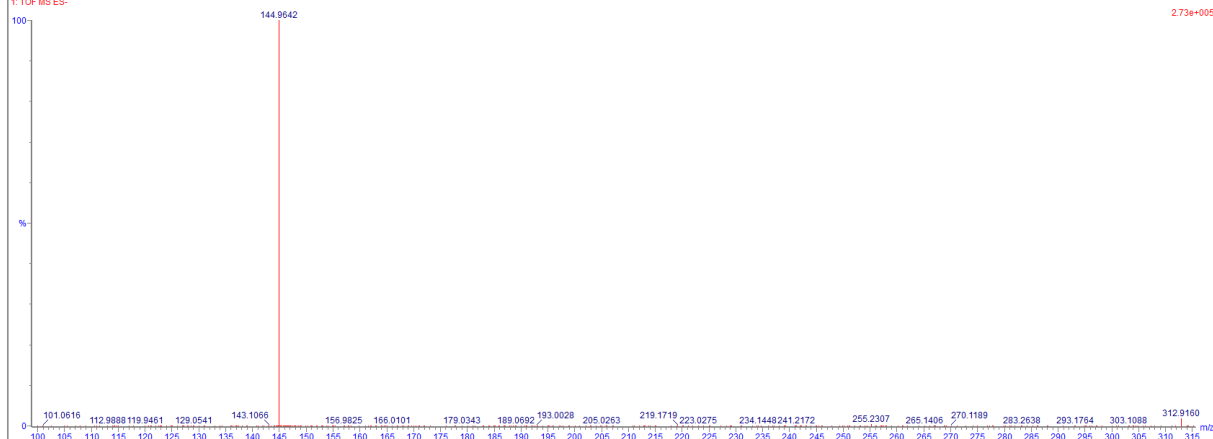**3 HRMS (ESI, negative mode): calcd for PF<sub>6</sub><sup>-</sup> 144.9642 found 144.9642**

(c)

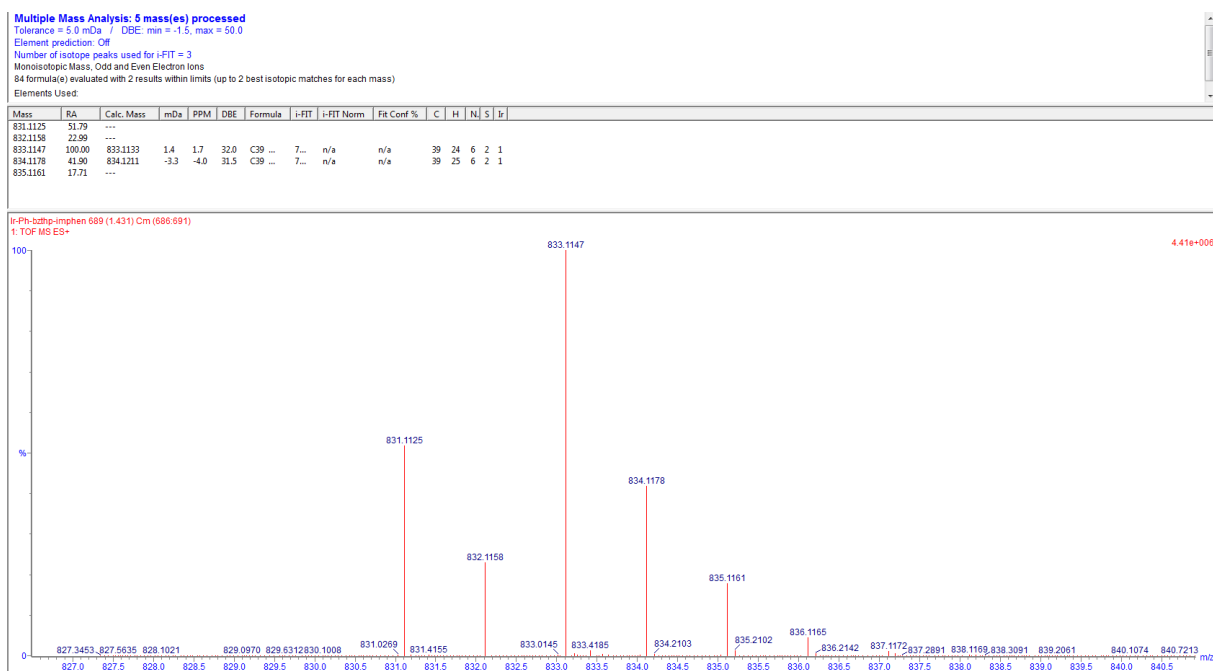

**4 HRMS (ESI, positive mode): calcd for C<sub>39</sub>H<sub>24</sub>IrN<sub>6</sub>S<sub>2</sub><sup>+</sup> 833.1133 found 833.1147**

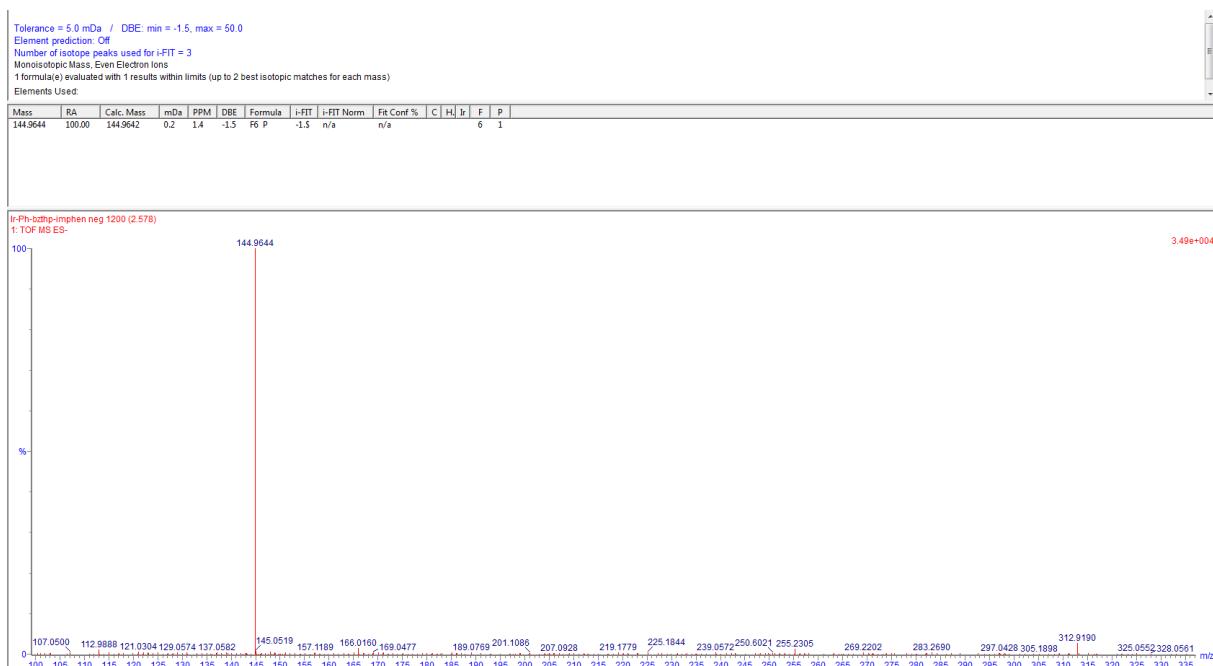

**4 HRMS (ESI, negative mode): calcd for PF<sub>6</sub><sup>-</sup> 144.9642 found 144.9644**

(d)

**Figure S5.** HRMS spectra of the complexes **1-4** (a-d).

# IR SPECTRA

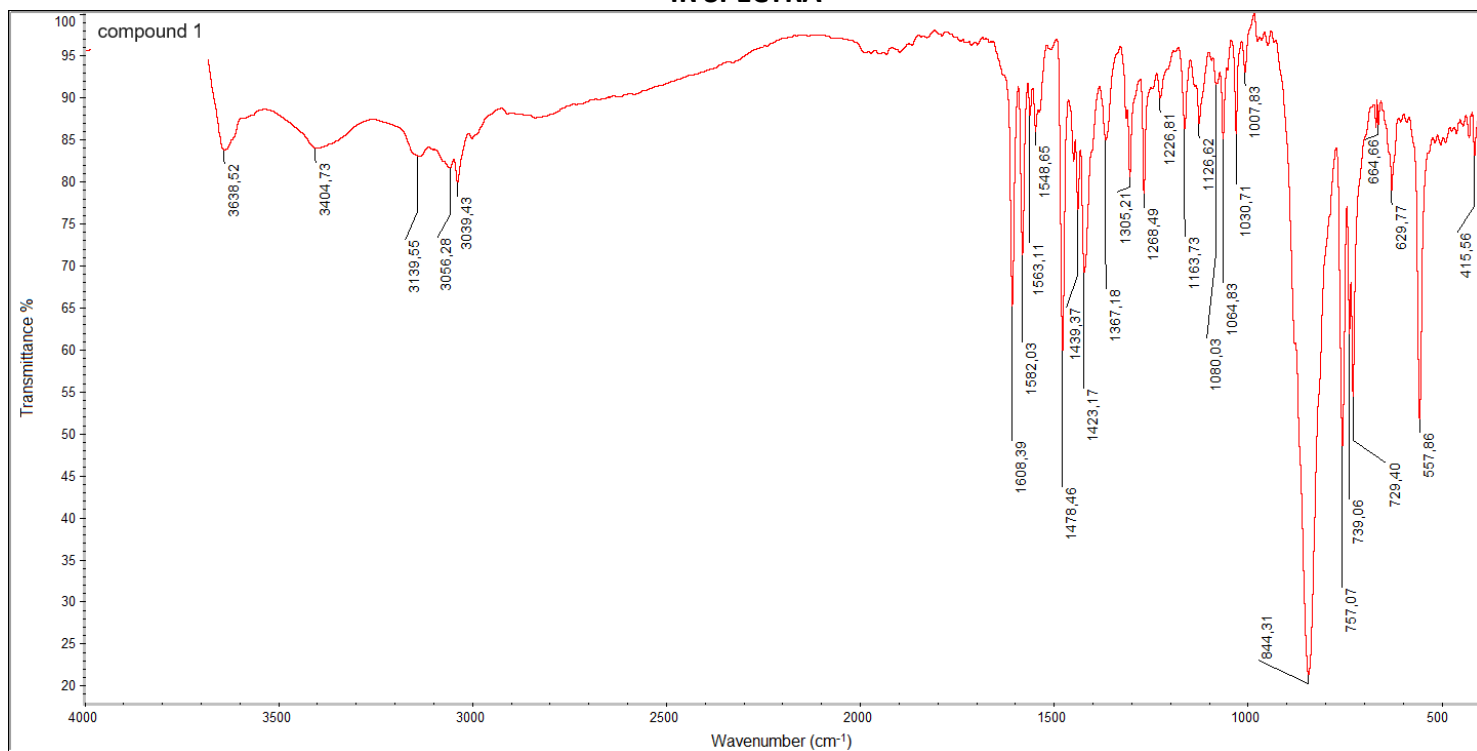

(a)

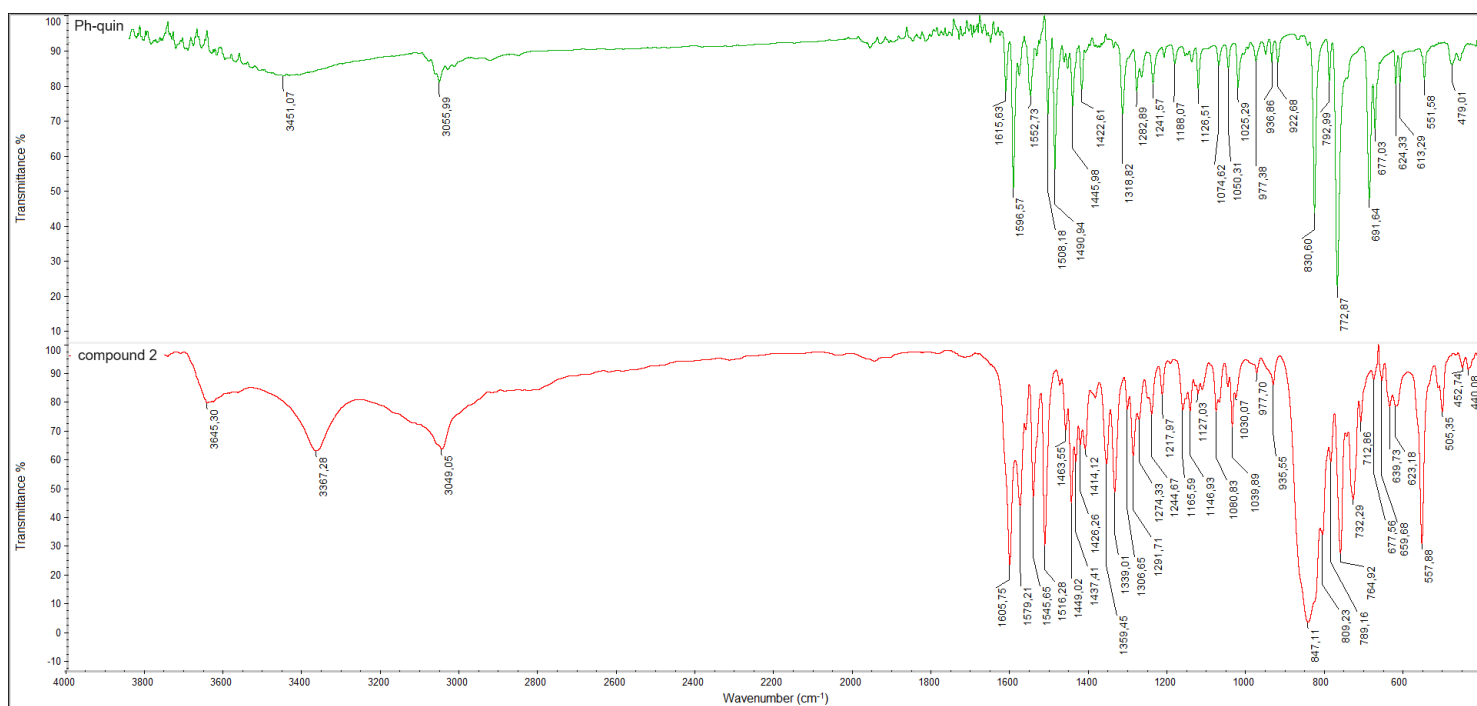

(b)

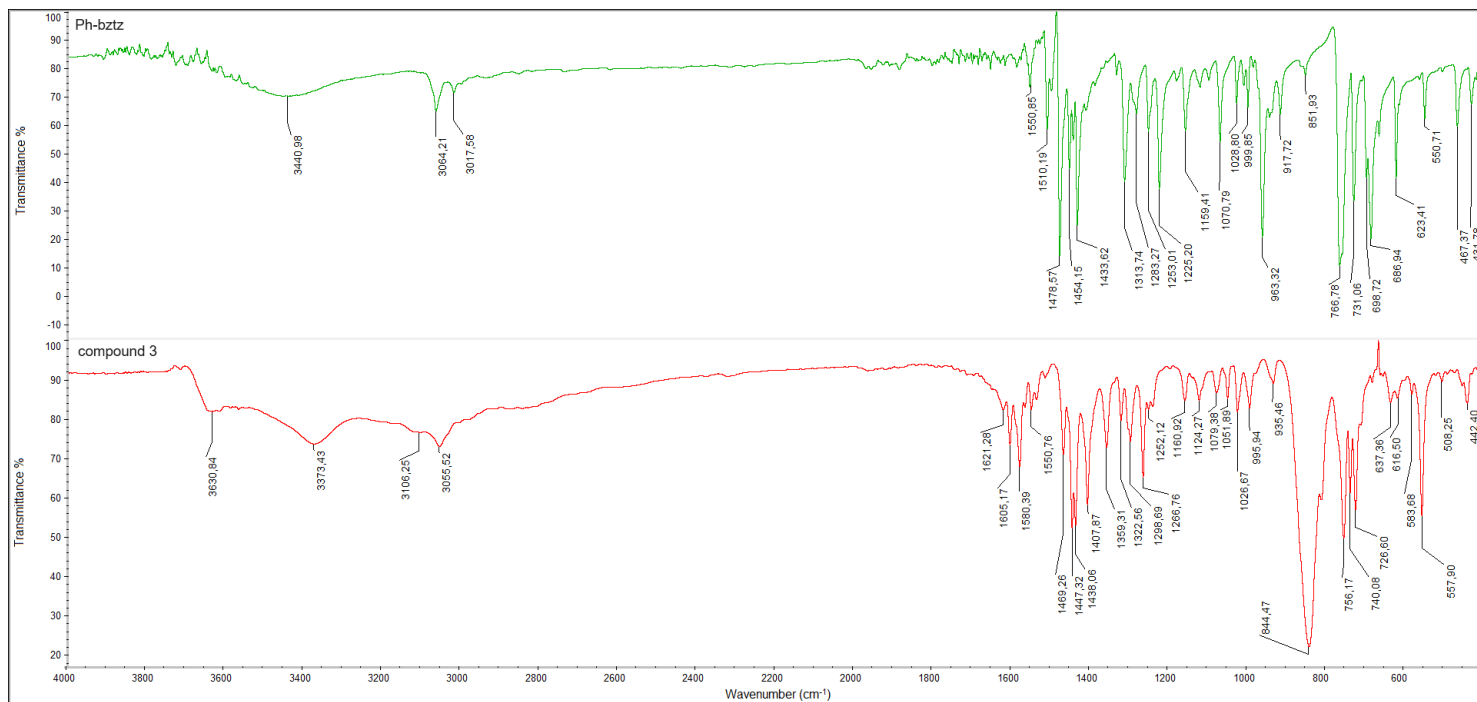

(c)

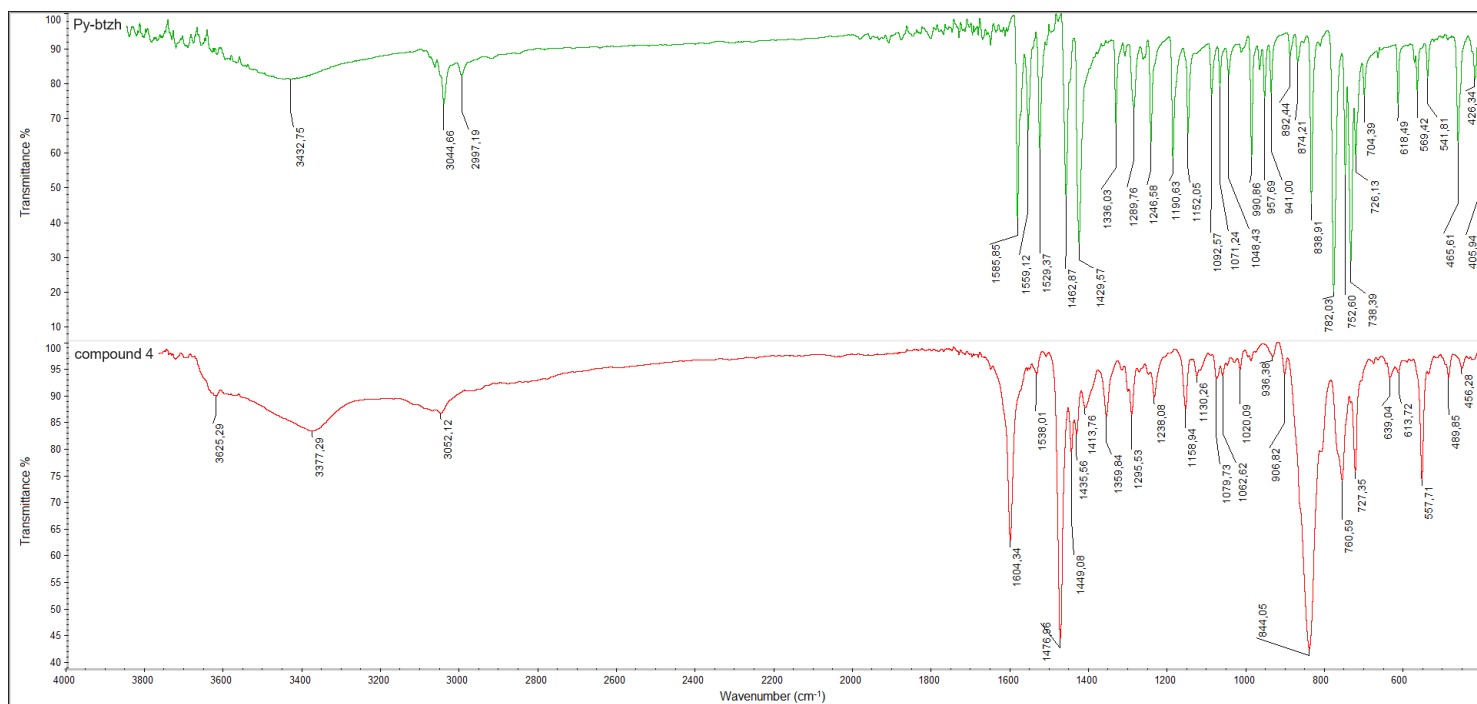

(d)

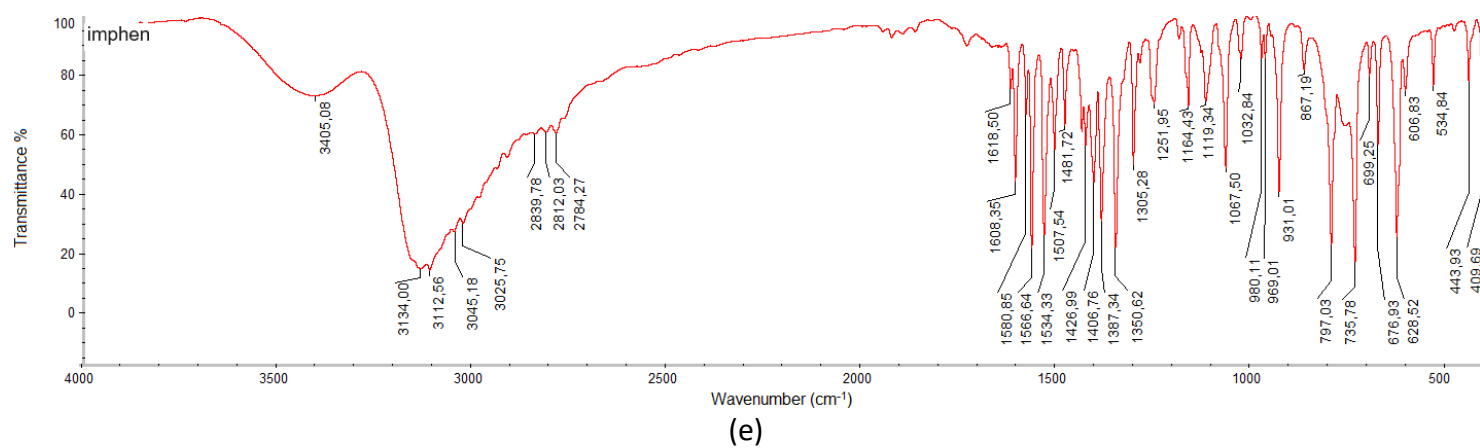

**Figure S6.** FT-IR spectrum of compound **1** (a); FT-IR spectra of compounds **2–4** (lower, red) in comparison with their respective H(N<sup>∘</sup>C) ligands (upper, green) (b–d); FT-IR spectrum of ligand imphen (e).

# X-RAY STRUCTURAL ANALYSIS

**Table S1.** Crystal data and structure refinement of **2**.

| Complex                                             | <b>2</b>                                                          |
|-----------------------------------------------------|-------------------------------------------------------------------|
| Empirical formula                                   | C <sub>43</sub> H <sub>28</sub> F <sub>6</sub> IrN <sub>6</sub> P |
| Formula weight                                      | 965.88                                                            |
| Temperature [K]                                     | 293.0(2)                                                          |
| Wavelength [Å]                                      | 0.71073                                                           |
| Crystal system                                      | Orthorhombic                                                      |
| Space group                                         | <i>P</i> 2 <sub>1</sub> 2 <sub>1</sub> 2 <sub>1</sub>             |
| Unit cell dimensions [Å,°]                          | <i>a</i> = 15.2609(5)                                             |
|                                                     | <i>b</i> = 15.7886(5)                                             |
|                                                     | <i>c</i> = 15.9948(6)                                             |
| Volume [Å <sup>3</sup> ]                            | 3853.9(2)                                                         |
| <i>Z</i>                                            | 4                                                                 |
| Density (calculated) [Mg/m <sup>3</sup> ]           | 1.665                                                             |
| Absorption coefficient [mm <sup>-1</sup> ]          | 3.575                                                             |
| <i>F</i> (000)                                      | 1896                                                              |
| Crystal size [mm]                                   | 0.06 × 0.06 × 0.25                                                |
| θ range for data collection [°]                     | 3.73 to 27.75                                                     |
| Index ranges                                        | -14 ≤ <i>h</i> ≤ 20                                               |
|                                                     | -21 ≤ <i>k</i> ≤ 16                                               |
|                                                     | -17 ≤ <i>l</i> ≤ 20                                               |
| Reflections collected                               | 21048                                                             |
| Independent reflections                             | 9075 ( <i>R</i> <sub>int</sub> = 0.0389)                          |
| Completeness to 2θ                                  | 99.6%                                                             |
| Min. and max. transm.                               | 0.632 and 1.000                                                   |
| Data / restraints / parameters                      | 9075 / 0 / 514                                                    |
| Goodness-of-fit on <i>F</i> <sup>2</sup>            | 1.049                                                             |
| Final <i>R</i> indices [ <i>I</i> > 2σ( <i>I</i> )] | <i>R</i> <sub>1</sub> = 0.0422                                    |
|                                                     | <i>wR</i> <sub>2</sub> = 0.0868                                   |
| <i>R</i> indices (all data)                         | <i>R</i> <sub>1</sub> = 0.0587                                    |
|                                                     | <i>wR</i> <sub>2</sub> = 0.0962                                   |
| Largest diff. peak and hole [e Å <sup>-3</sup> ]    | 1.99 and -0.75                                                    |
| CCDC deposit no.                                    | 2369644                                                           |

**Table S2.** Short intra- and intermolecular hydrogen bonds of complex **2**.

| D–H...A                          | D–H [Å] | H...A [Å] | D–A [Å]   | D–H...A [°] |
|----------------------------------|---------|-----------|-----------|-------------|
| N(4)–H(4)····F(1) <sup>a</sup>   | 0.86    | 2.40      | 3.19(2)   | 155.00      |
| N(4)–H(4) ·····F(4) <sup>a</sup> | 0.86    | 2.37      | 3.111(18) | 144.00      |
| C(2)–H(2) ·····F(1)              | 0.93    | 2.42      | 3.269(15) | 152.00      |
| C(15)–H(15)····N(1)              | 0.93    | 2.22      | 3.070(12) | 151.00      |
| C(16)–H(16)····F(4) <sup>b</sup> | 0.93    | 2.54      | 3.19(2)   | 127.00      |
| C(30)–H(30)····N(2)              | 0.93    | 2.43      | 3.108(12) | 130.00      |

Symmetry codes: (a) = -*x*, -1/2+*y*, -1/2-*z*; (b) = -1/2+*x*, -1/2-*y*, -*z*

**Table S3.** X–H···Cg(J)( $\pi$ -ring) interactions of complex **2**.

| X–H···Cg(J)                       | H(I)···Cg(J)<br>[Å] | X-Perp [Å] | $\gamma$ [°] | X–H(I)···Cg(J)<br>[°] |
|-----------------------------------|---------------------|------------|--------------|-----------------------|
| C(10)–H(10)···Cg(13) <sup>c</sup> | 2.67                | -2.58      | 14.93        | 147                   |
| C(20)–H(20)···Cg(12) <sup>c</sup> | 2.82                | 2.65       | 20.02        | 136                   |
| C(26)–H(26)···Cg(10) <sup>d</sup> | 2.81                | -2.73      | 13.27        | 148                   |
| C(35)–H(35)···Cg(10) <sup>e</sup> | 2.77                | 2.67       | 15.46        | 168                   |
| C(40)–H(40)···Cg(9) <sup>e</sup>  | 2.94                | -2.87      | 12.28        | 148                   |
| C(41)–H(41)···Cg(5) <sup>e</sup>  | 2.96                | -2.96      | 4.14         | 142                   |

symmetry codes: (c) =  $-1/2+x, -3/2-y, -z$ ; (d) =  $1/2+x, -3/2-y, -z$ ; (e) =  $-3/2-x, -1-y, -1/2+z$ .  $\gamma$  = angle X(I)→Cg(J) vector and normal to plane J. Cg(13) is the centroid of atoms = C38/C39/C40/C41/C42/C43; Cg(12) is the centroid of atoms = C29/C30/C31/C32/C33/C34; Cg(10) is the centroid of atoms = C14/C15/C16/C17/C18/C19; Cg(9) is the centroid of atoms = C4/C5/C7/C8/C12/C13; Cg(5) is the centroid of atoms = N1/C1/C2/C3/C4/C13;

### DFT CALCULATIONS

**Table S4.** Comparison of theoretical (DFT/PBE1PBE/SDD/def2-TZVP) and experimental (X-Ray) bond lengths and angles for complex **2**. The theoretical structures were fully optimized with use of spin-restricted ( $S_0$ ) or unrestricted ( $T_1$ ) DFT approach.

|                     | X-ray    | $S_0$   | $T_1$   |
|---------------------|----------|---------|---------|
| <b>bond lengths</b> |          |         |         |
| Ir(1)–N(1)          | 2.195(7) | 2.20572 | 2.2254  |
| Ir(1)–N(2)          | 2.166(7) | 2.20580 | 2.21001 |
| Ir(1)–N(5)          | 2.081(7) | 2.10699 | 2.1299  |
| Ir(1)–N(6)          | 2.078(7) | 2.10717 | 2.0357  |
| Ir(1)–C(28)         | 1.998(7) | 1.99808 | 1.9984  |
| Ir(1)–C(43)         | 1.996(8) | 1.99790 | 1.9812  |
| <b>bond angles</b>  |          |         |         |
| N(2)–Ir(1)–N(1)     | 75.7(3)  | 74.797  | 74.62   |
| N(5)–Ir(1)–N(1)     | 104.9(3) | 104.225 | 104.57  |
| N(5)–Ir(1)–N(2)     | 84.1(3)  | 82.306  | 83.20   |
| N(6)–Ir(1)–N(1)     | 80.6(3)  | 82.239  | 81.78   |
| N(6)–Ir(1)–N(2)     | 102.8(3) | 104.162 | 100.62  |
| N(6)–Ir(1)–N(5)     | 172.2(3) | 172.007 | 173.34  |
| C(28)–Ir(1)–N(1)    | 170.4(3) | 170.738 | 171.38  |
| C(28)–Ir(1)–N(2)    | 96.7(3)  | 97.610  | 98.59   |
| C(28)–Ir(1)–N(5)    | 79.8(3)  | 79.580  | 79.48   |
| C(28)–Ir(1)–N(6)    | 95.7(3)  | 94.743  | 94.49   |
| C(43)–Ir(1)–N(1)    | 97.0(3)  | 97.577  | 96.18   |
| C(43)–Ir(1)–N(2)    | 171.6(3) | 170.740 | 170.16  |
| C(43)–Ir(1)–N(5)    | 93.8(3)  | 94.743  | 96.02   |
| C(43)–Ir(1)–N(6)    | 79.8(3)  | 79.579  | 81.15   |
| C(43)–Ir(1)–C(28)   | 91.0(3)  | 90.447  | 90.89   |

**Table S5.** Comparison of theoretical singlet and triplet-optimized bond lengths and angles for complexes **1**, **3** and **4** (DFT/PBE1PBE/SDD/def2-TZVP). The structures were fully optimized with use of spin-restricted ( $S_0$ ) or unrestricted ( $T_1$ ) DFT approach.

|                     | <b>1</b> |        | <b>3</b> |        | <b>4</b> |        |
|---------------------|----------|--------|----------|--------|----------|--------|
|                     | $S_0$    | $T_1$  | $S_0$    | $T_1$  | $S_0$    | $T_1$  |
| <b>bond lengths</b> |          |        |          |        |          |        |
| Ir(1)–N(1)          | 2.1701   | 2.1677 | 2.1710   | 2.1640 | 2.1529   | 2.1476 |
| Ir(1)–N(2)          | 2.1716   | 2.1662 | 2.1728   | 2.1634 | 2.1543   | 2.1465 |
| Ir(1)–N(5)          | 2.0602   | 2.0604 | 2.0789   | 2.0754 | 2.0718   | 2.0681 |
| Ir(1)–N(6)          | 2.0599   | 2.0604 | 2.0789   | 2.0754 | 2.0718   | 2.0681 |
| Ir(1)–C(28)         | 2.0111   | 1.9879 | 2.0160   | 1.9954 | 2.0240   | 1.9924 |
| Ir(1)–C(43)         | 2.0106   | 1.9883 | 2.0155   | 1.9956 | 2.0235   | 1.9922 |
| <b>bond angles</b>  |          |        |          |        |          |        |
| N(2)–Ir(1)–N(1)     | 76.21    | 76.10  | 76.07    | 76.17  | 76.80    | 77.14  |
| N(5)–Ir(1)–N(1)     | 96.64    | 95.45  | 86.03    | 85.09  | 86.43    | 85.68  |
| N(5)–Ir(1)–N(2)     | 88.30    | 87.40  | 101.24   | 100.26 | 95.28    | 93.55  |
| N(6)–Ir(1)–N(1)     | 88.43    | 87.43  | 101.13   | 100.20 | 95.22    | 93.53  |
| N(6)–Ir(1)–N(2)     | 96.77    | 95.47  | 85.95    | 85.08  | 86.41    | 85.66  |
| N(6)–Ir(1)–N(5)     | 173.58   | 176.36 | 170.97   | 173.30 | 177.88   | 178.99 |
| C(28)–Ir(1)–N(1)    | 172.99   | 169.43 | 173.04   | 170.04 | 172.22   | 170.58 |
| C(28)–Ir(1)–N(2)    | 97.42    | 93.76  | 97.15    | 94.06  | 96.84    | 94.92  |
| C(28)–Ir(1)–N(5)    | 80.06    | 80.91  | 93.90    | 94.94  | 98.74    | 100.01 |
| C(28)–Ir(1)–N(6)    | 95.32    | 96.63  | 79.67    | 80.56  | 79.76    | 80.69  |
| C(43)–Ir(1)–N(1)    | 97.52    | 93.72  | 97.38    | 94.41  | 96.96    | 95.06  |
| C(43)–Ir(1)–N(2)    | 173.13   | 169.39 | 173.24   | 170.38 | 172.34   | 170.71 |
| C(43)–Ir(1)–N(5)    | 95.31    | 96.65  | 79.67    | 80.53  | 79.76    | 80.69  |
| C(43)–Ir(1)–N(6)    | 80.07    | 80.91  | 93.84    | 94.88  | 98.70    | 100.00 |
| C(43)–Ir(1)–C(28)   | 88.98    | 96.56  | 89.45    | 95.42  | 89.72    | 93.27  |

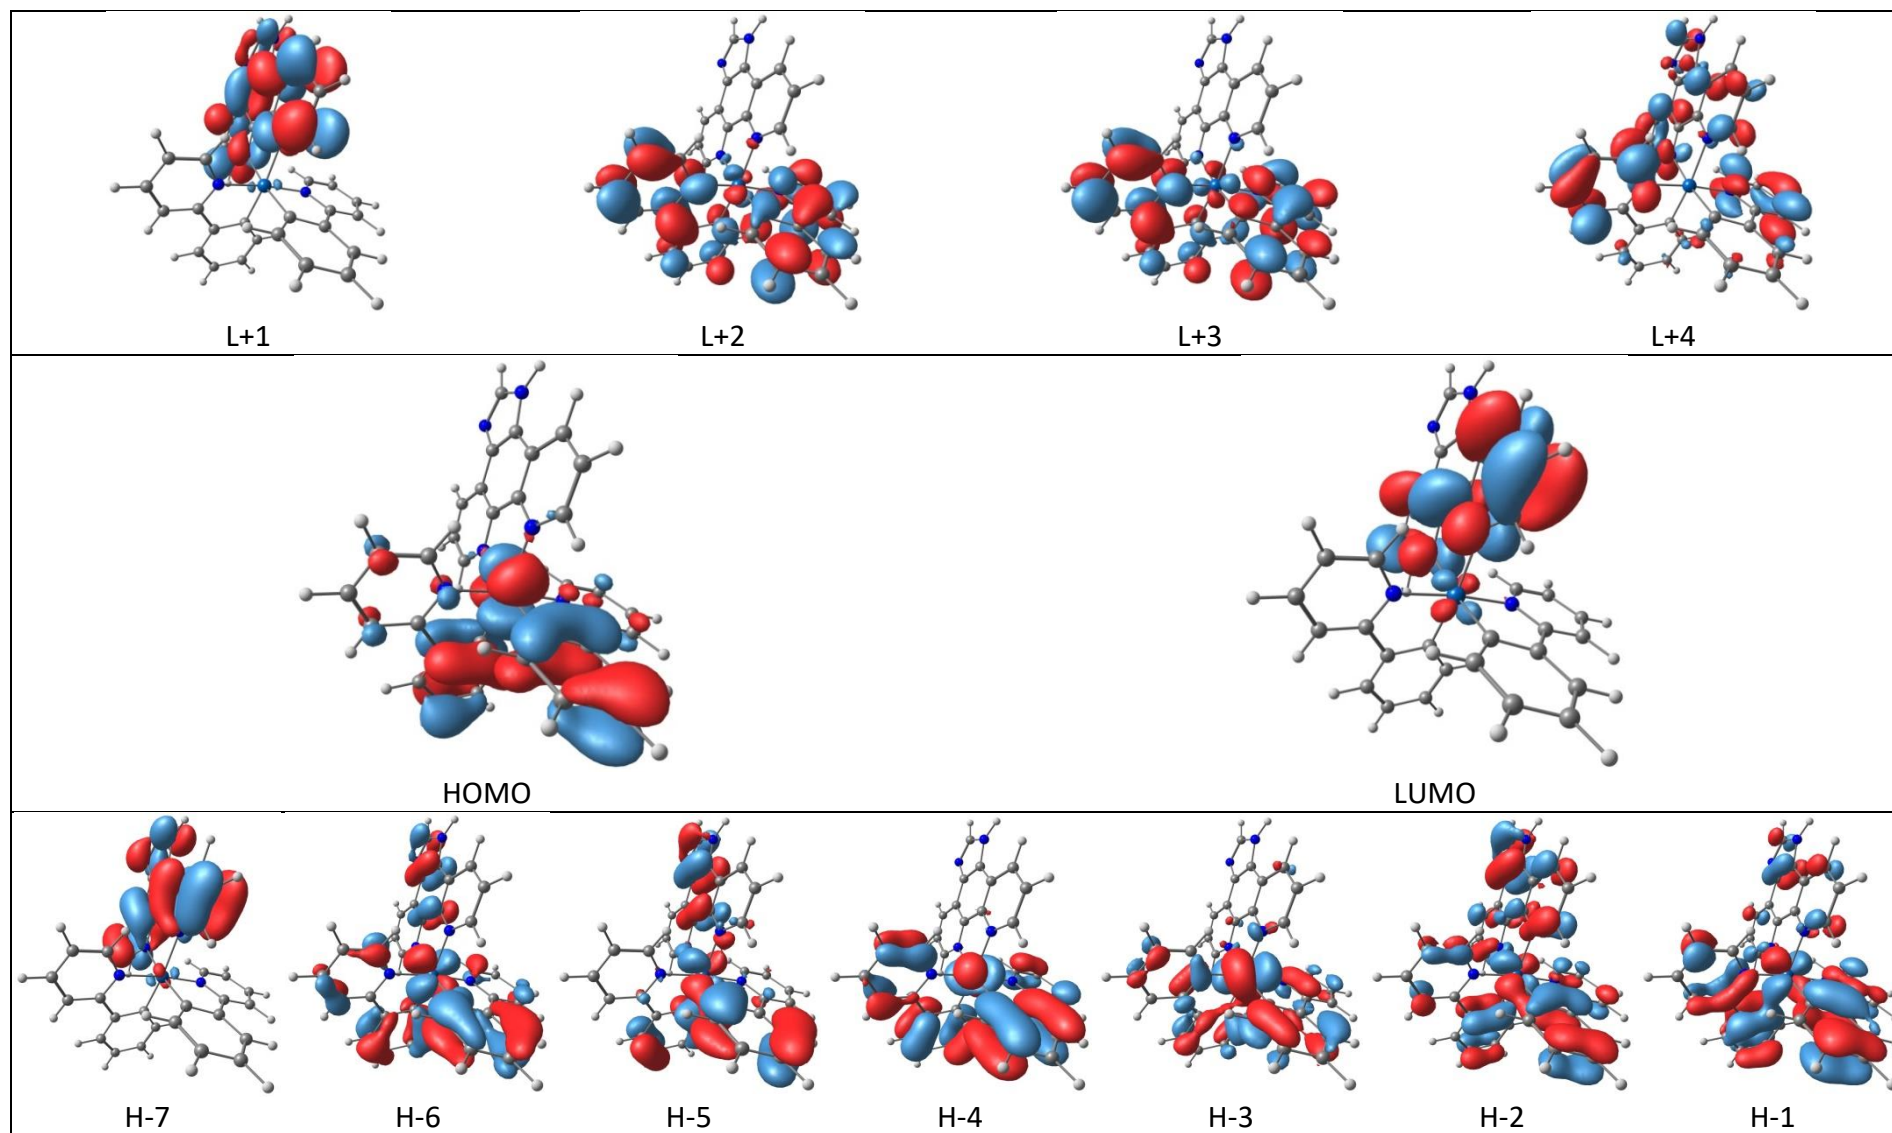

**Figure S7.** Selected molecular orbitals of **1**, calculated with the Gaussian-16 software at TD-DFT/PBE1PBE/SDD/def2-TZVP level with the use of the PCM model at polarities corresponding to acetonitrile.

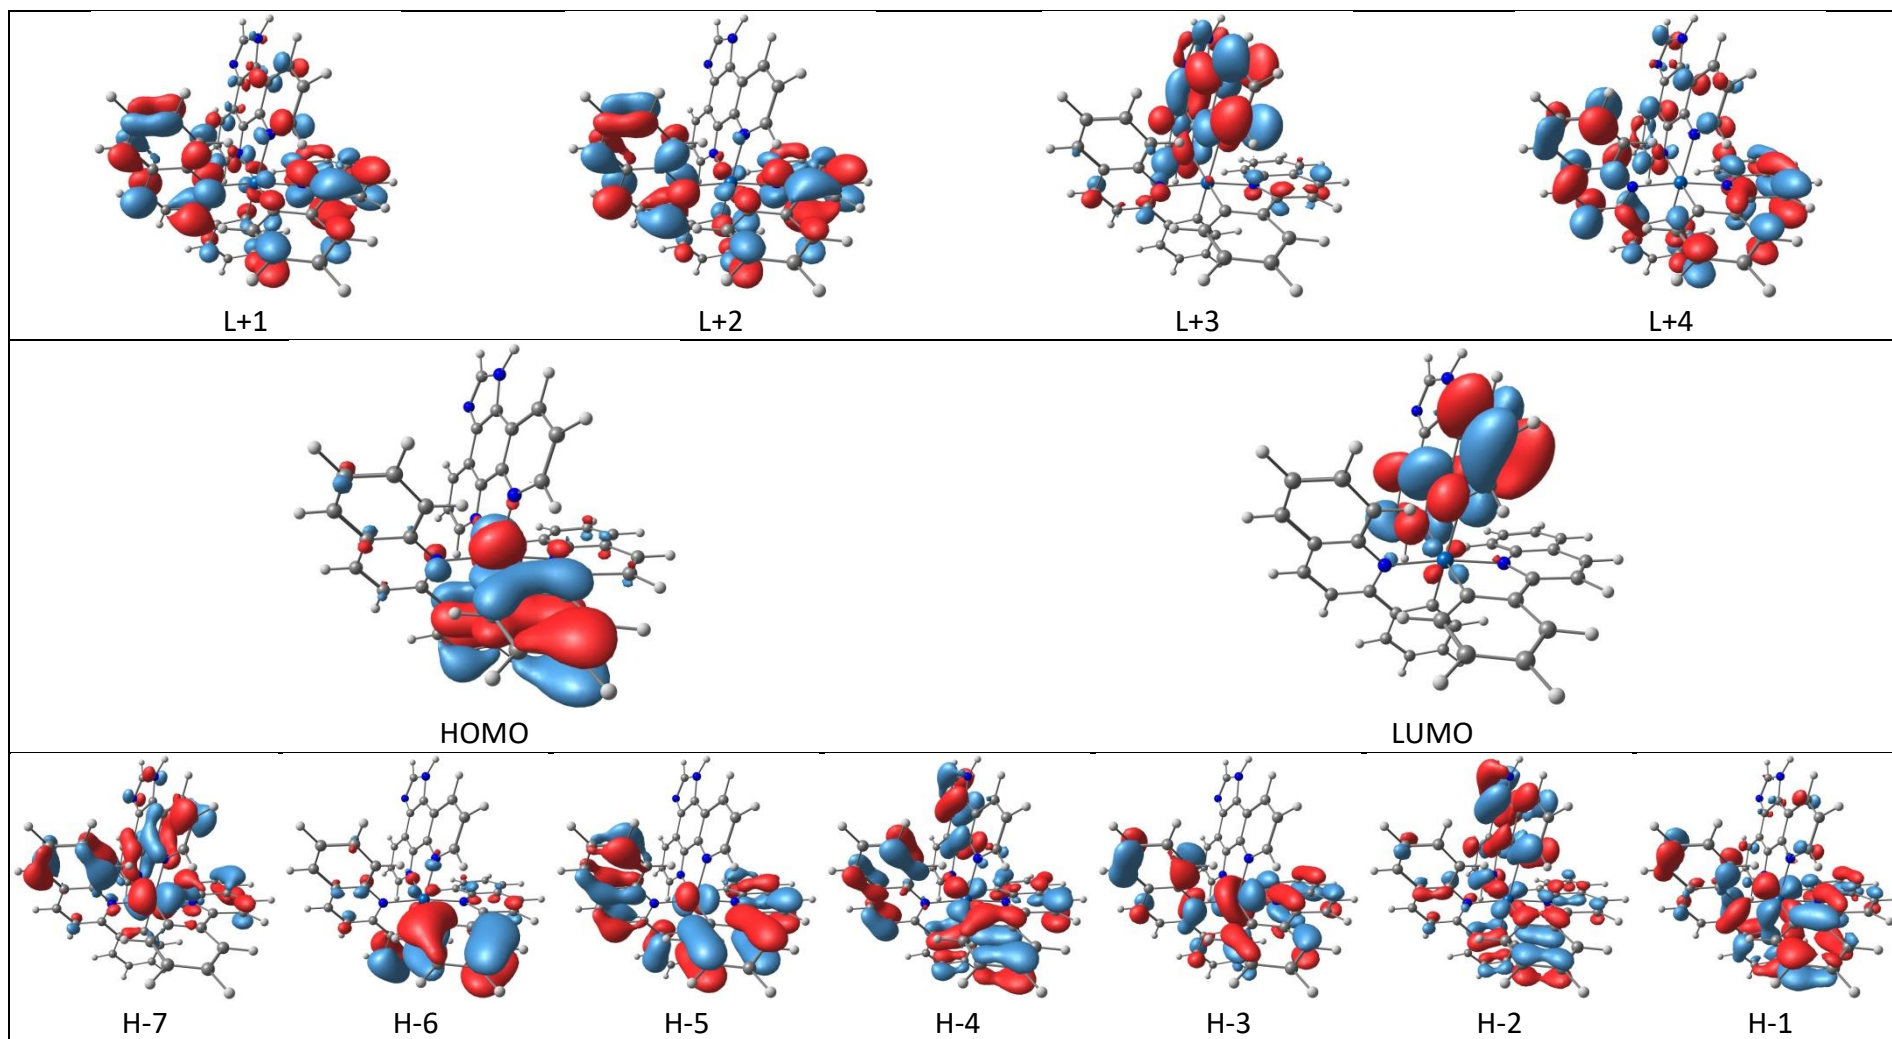

**Figure S8.** Selected molecular orbitals of **2**, calculated with the Gaussian-16 software at TD-DFT/PBE1PBE/SDD/def2-TZVP level with the use of the PCM model at polarities corresponding to acetonitrile.

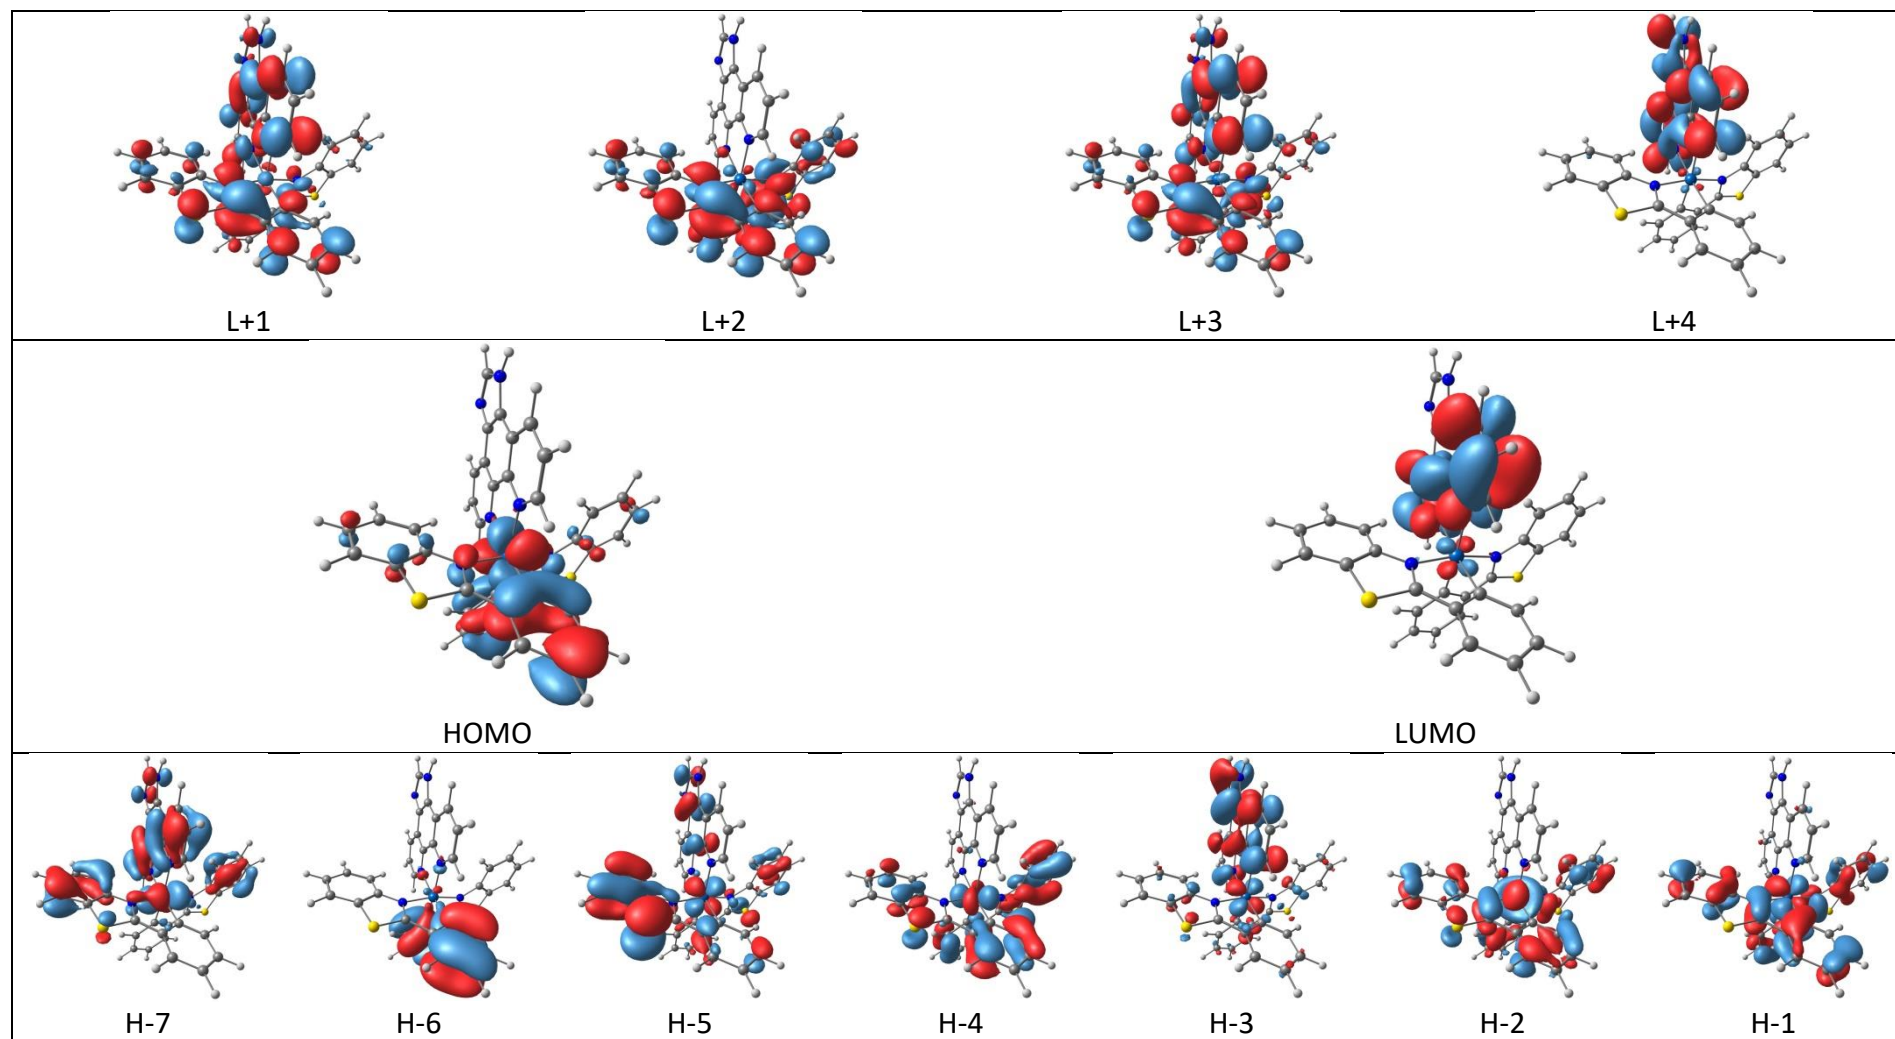

**Figure S9.** Selected molecular orbitals of **3**, calculated with the Gaussian-16 software at TD-DFT/PBE1PBE/SDD/def2-TZVP level with the use of the PCM model at polarities corresponding to acetonitrile.

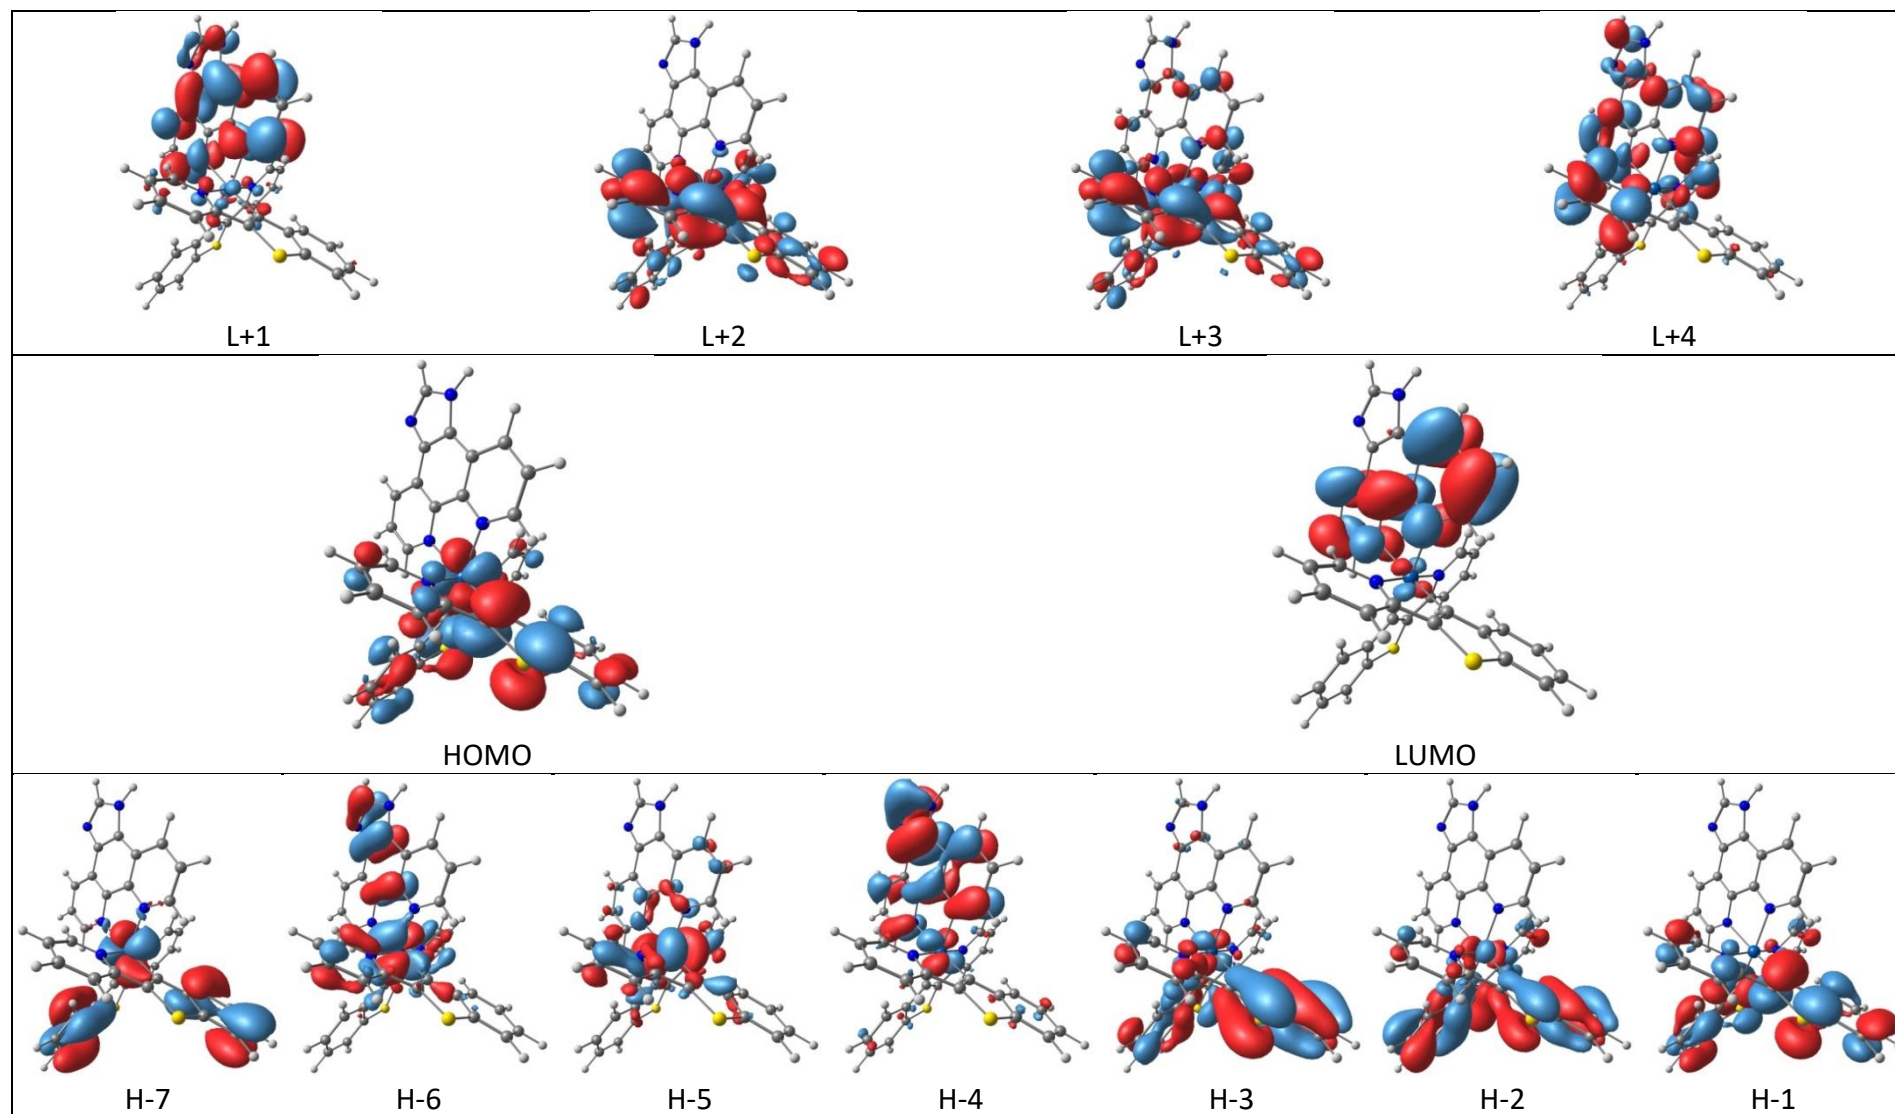

**Figure S10.** Selected molecular orbitals of **4**, calculated with the Gaussian-16 software at TD-DFT/PBE1PBE/SDD/def2-TZVP level with the use of the PCM model at polarities corresponding to acetonitrile.

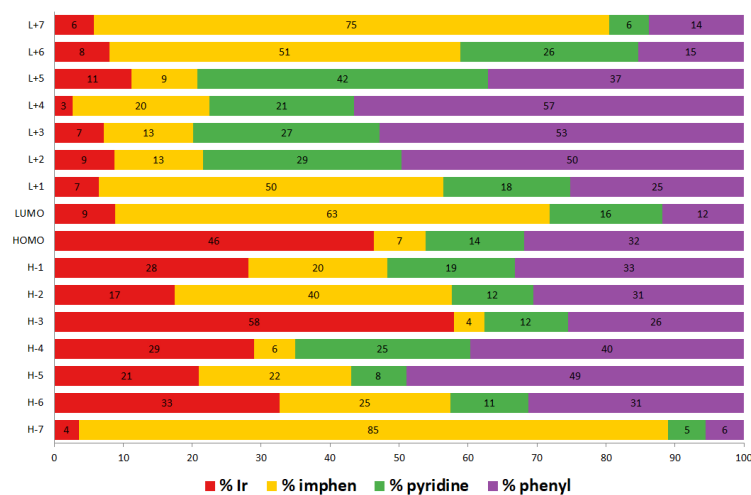

1

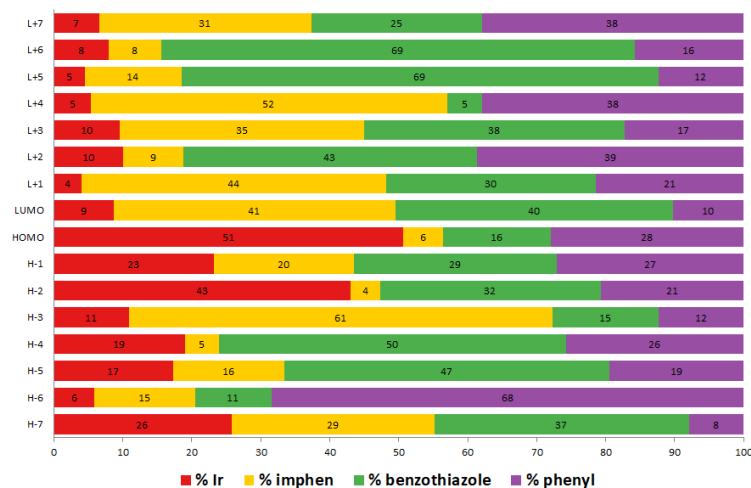

3

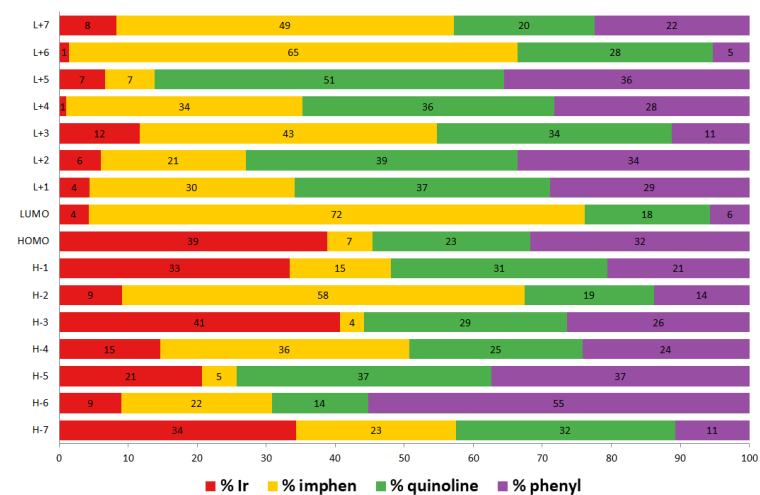

2

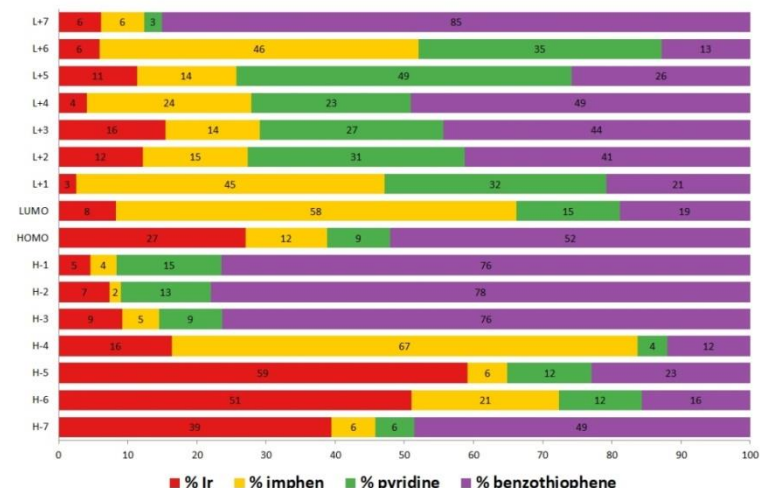

4

**Figure S11.** Percentage contribution of selected molecular fragments to the frontier molecular orbitals for complexes **1–4** according to DFT/PBE1PBE/SDD/def2-TZVP calculations with the use of the PCM model at polarities corresponding to acetonitrile.

**Table S6.** Calculated electron transitions of complex **1**, assigned to its experimental UV-Vis spectrum in acetonitrile.

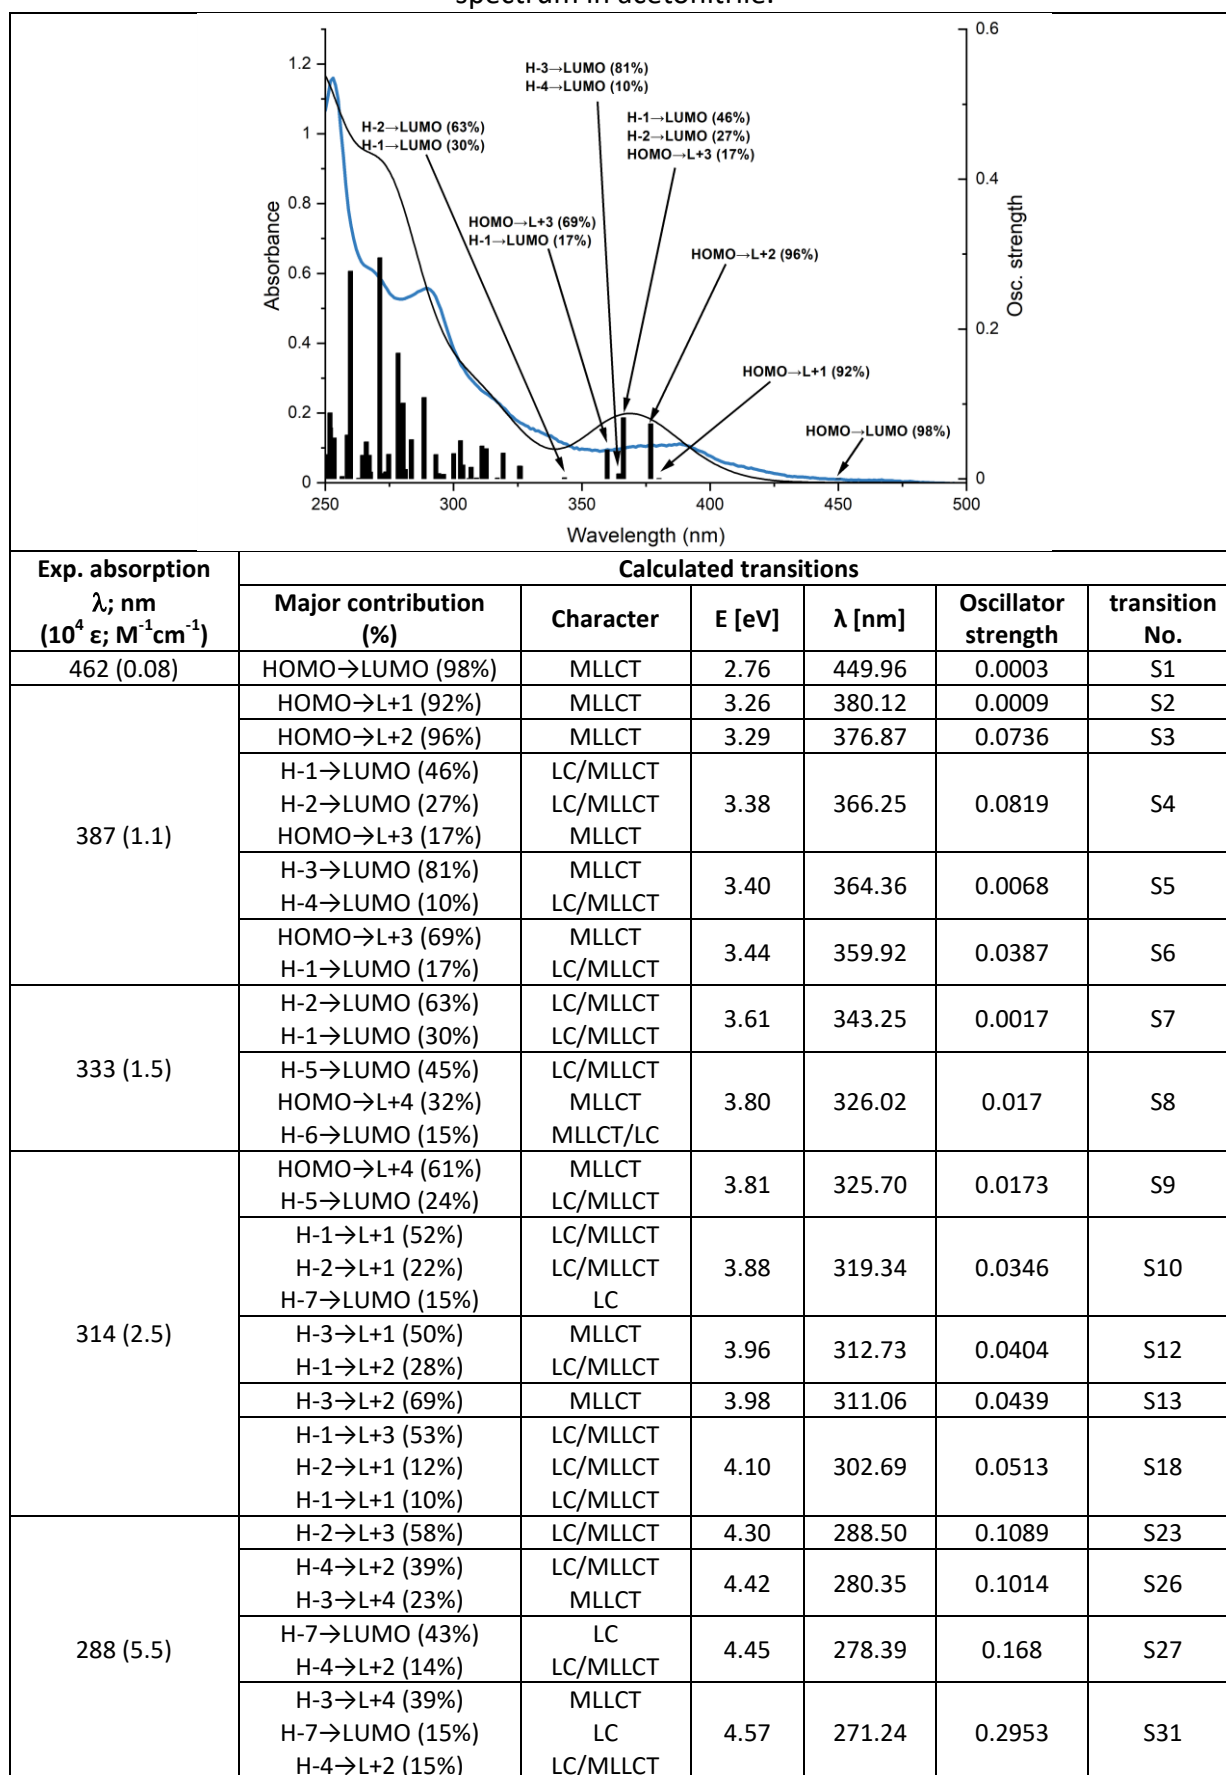

**Table S7.** Calculated electron transitions of complex **2**, assigned to its experimental UV-Vis spectrum in acetonitrile.

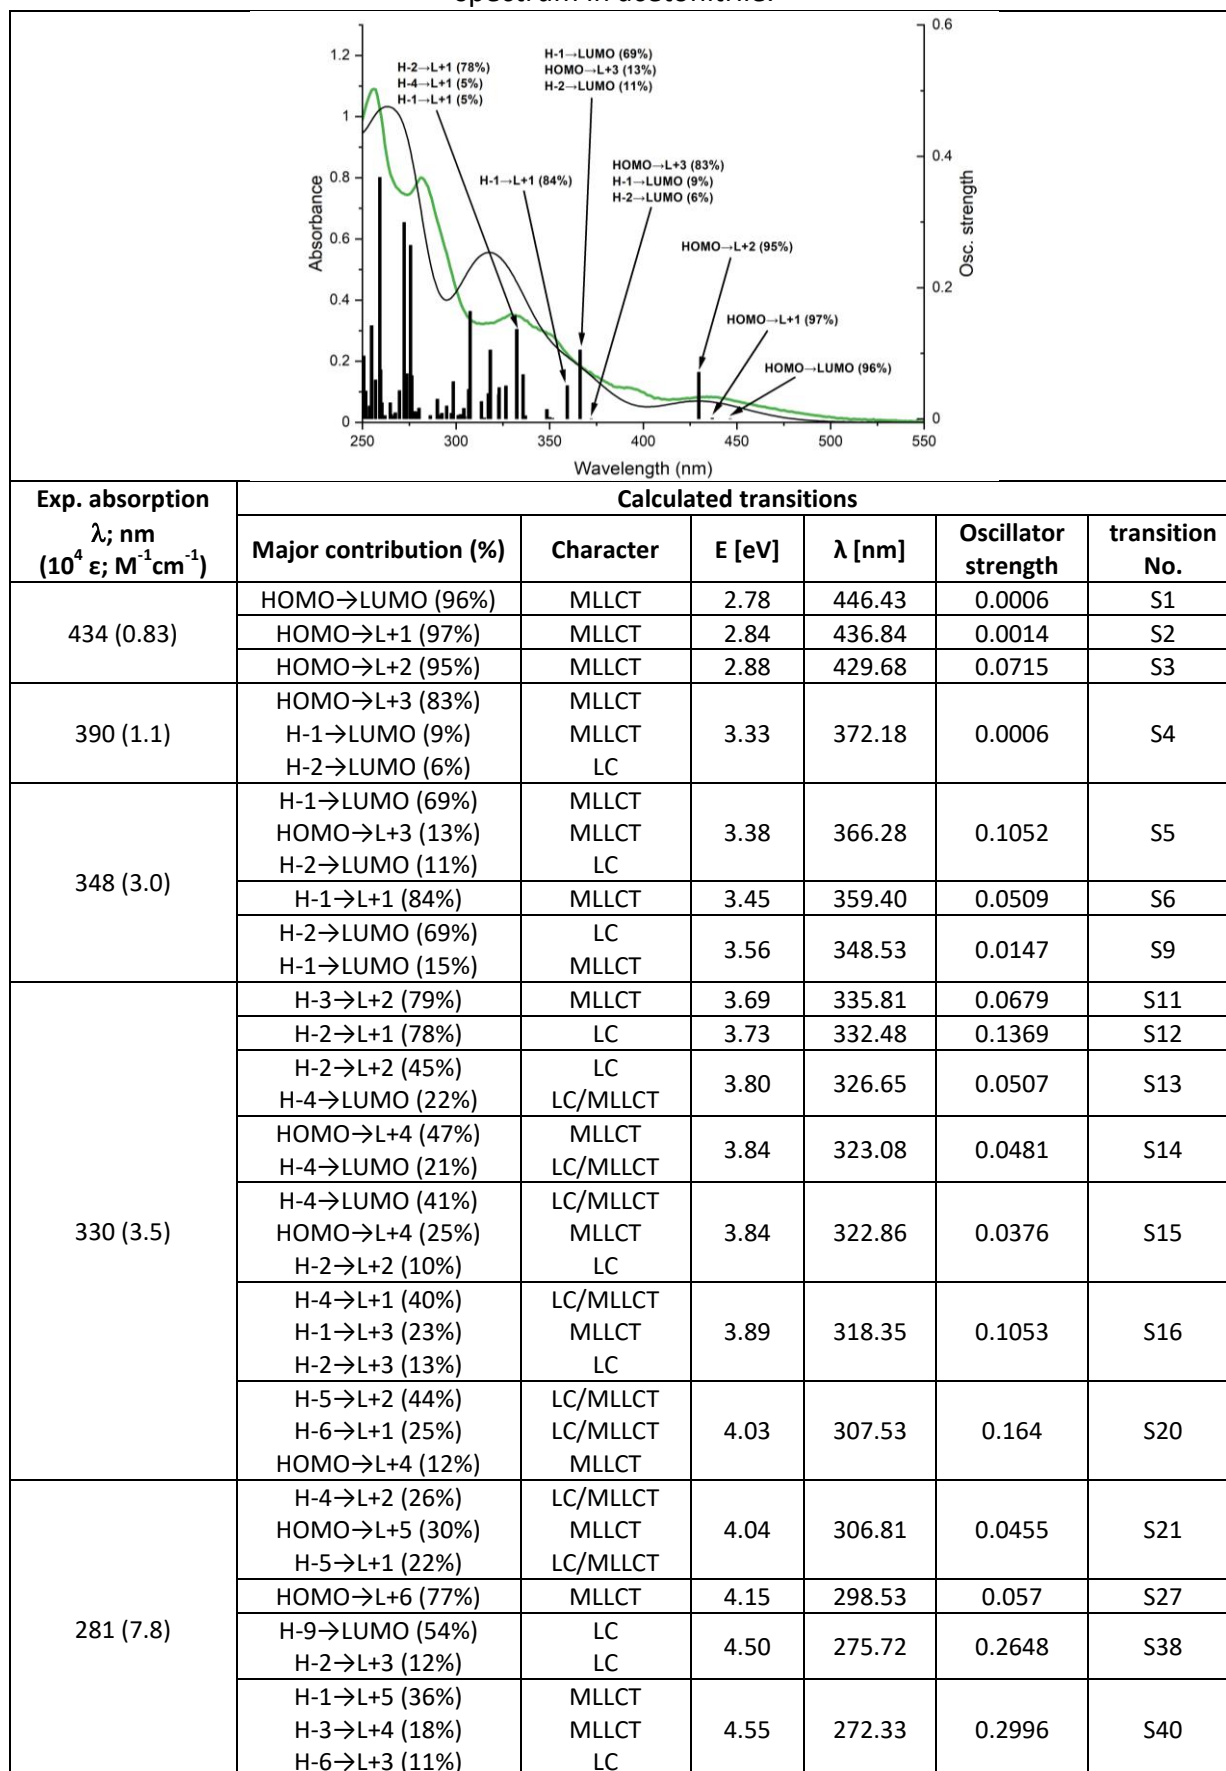

**Table S8.** Calculated electron transitions of complex **3**, assigned to its experimental UV-Vis spectrum in acetonitrile.

| 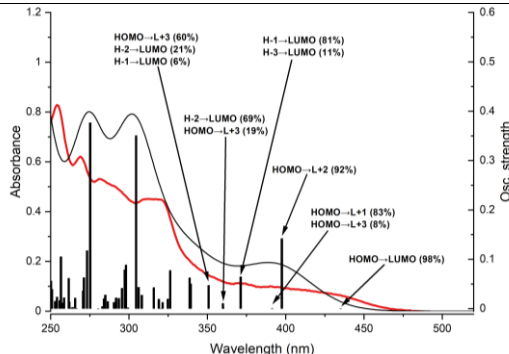          |                                                   |                                  |        |                |                     |                |
|---------------------------------------------------------------------------------------------|---------------------------------------------------|----------------------------------|--------|----------------|---------------------|----------------|
| Exp. absorption<br>$\lambda$ ; nm<br>( $10^4 \epsilon$ ; M <sup>-1</sup> cm <sup>-1</sup> ) | Calculated transitions                            |                                  |        |                |                     |                |
|                                                                                             | Major contribution (%)                            | Character                        | E [eV] | $\lambda$ [nm] | Oscillator strength | transition No. |
| 427 (0.72)                                                                                  | HOMO→LUMO (98%)                                   | MLLCT                            | 2.85   | 435.11         | 0.0003              | S1             |
|                                                                                             | HOMO→L+2 (92%)                                    | MLLCT                            | 3.12   | 397.60         | 0.142               | S2             |
|                                                                                             | HOMO→L+1 (83%)                                    | MLLCT                            | 3.17   | 391.40         | 0.0009              | S3             |
| 368 (1.1)                                                                                   | H-1→LUMO (81%)<br>H-3→LUMO (11%)                  | MLLCT/LC<br>LC                   | 3.34   | 371.34         | 0.0646              | S4             |
|                                                                                             | H-2→LUMO (69%)<br>HOMO→L+3 (19%)                  | MLLCT<br>MLLCT                   | 3.44   | 360.20         | 0.0022              | S5             |
|                                                                                             | HOMO→L+3 (60%)<br>H-2→LUMO (21%)                  | MLLCT<br>MLLCT                   | 3.44   | 360.00         | 0.0109              | S6             |
| 344 (1.7)                                                                                   | H-3→LUMO (76%)                                    | LC                               | 3.53   | 350.86         | 0.0472              | S7             |
|                                                                                             | H-1→L+2 (47%)<br>H-1→L+1 (37%)                    | MLLCT/LC<br>MLLCT/LC             | 3.65   | 339.49         | 0.0501              | S8             |
|                                                                                             | H-1→L+1 (43%)<br>H-1→L+2 (39%)                    | MLLCT/LC<br>MLLCT/LC             | 3.66   | 338.72         | 0.0627              | S9             |
|                                                                                             | H-2→L+2 (79%)                                     | MLLCT                            | 3.80   | 326.35         | 0.0774              | S10            |
| 316 (4.5)                                                                                   | H-5→LUMO (72%)                                    | LC/MLLCT                         | 3.82   | 324.78         | 0.0195              | S11            |
|                                                                                             | H-2→L+1 (69%)                                     | MLLCT                            | 3.86   | 321.53         | 0.0127              | S12            |
|                                                                                             | H-1→L+3 (74%)                                     | MLLCT/LC                         | 3.88   | 319.08         | 0.0192              | S14            |
|                                                                                             | H-3→L+1 (60%)                                     | LC                               | 3.92   | 315.88         | 0.0426              | S15            |
|                                                                                             | H-5→L+1 (41%)<br>H-3→L+3 (21%)<br>H-4→L+2 (10%)   | LC/MLLCT<br>LC<br>LC/MLLCT       | 4.07   | 304.56         | 0.3505              | S18            |
|                                                                                             | H-4→L+2 (31%)<br>HOMO→L+4 (26%)<br>H-4→L+1 (11%)  | LC/MLLCT<br>MLLCT<br>LC/MLLCT    | 4.16   | 298.10         | 0.0887              | S20            |
| 283 (5.2)                                                                                   | H-4→L+1 (43%)<br>H-4→L+2 (11%)<br>H-5→L+1 (10%)   | LC/MLLCT<br>LC/MLLCT<br>LC/MLLCT | 4.17   | 297.26         | 0.0788              | S21            |
|                                                                                             | HOMO→L+4 (60%)<br>H-4→L+2 (26%)                   | MLLCT<br>LC/MLLCT                | 4.20   | 295.54         | 0.0415              | S22            |
|                                                                                             | H-8→LUMO (70%)<br>H-9→LUMO (18%)                  | LC<br>LC                         | 4.35   | 284.92         | 0.0279              | S27            |
|                                                                                             | H-9→LUMO (48%)<br>H-3→L+3 (16%)<br>H-8→LUMO (10%) | LC<br>LC<br>LC                   | 4.50   | 275.26         | 0.3767              | S31            |
| 268 (5.9)                                                                                   | H-7→L+1 (57%)<br>H-3→L+4 (15%)                    | MLLCT/LC<br>LC                   | 4.54   | 273.24         | 0.1177              | S32            |
|                                                                                             | H-7→L+2 (46%)<br>H-9→L+1 (11%)                    | MLLCT/LC<br>LC                   | 4.57   | 271.26         | 0.063               | S33            |

**Table S9.** Calculated electron transitions of complex **4**, assigned to its experimental UV-Vis spectrum in acetonitrile.

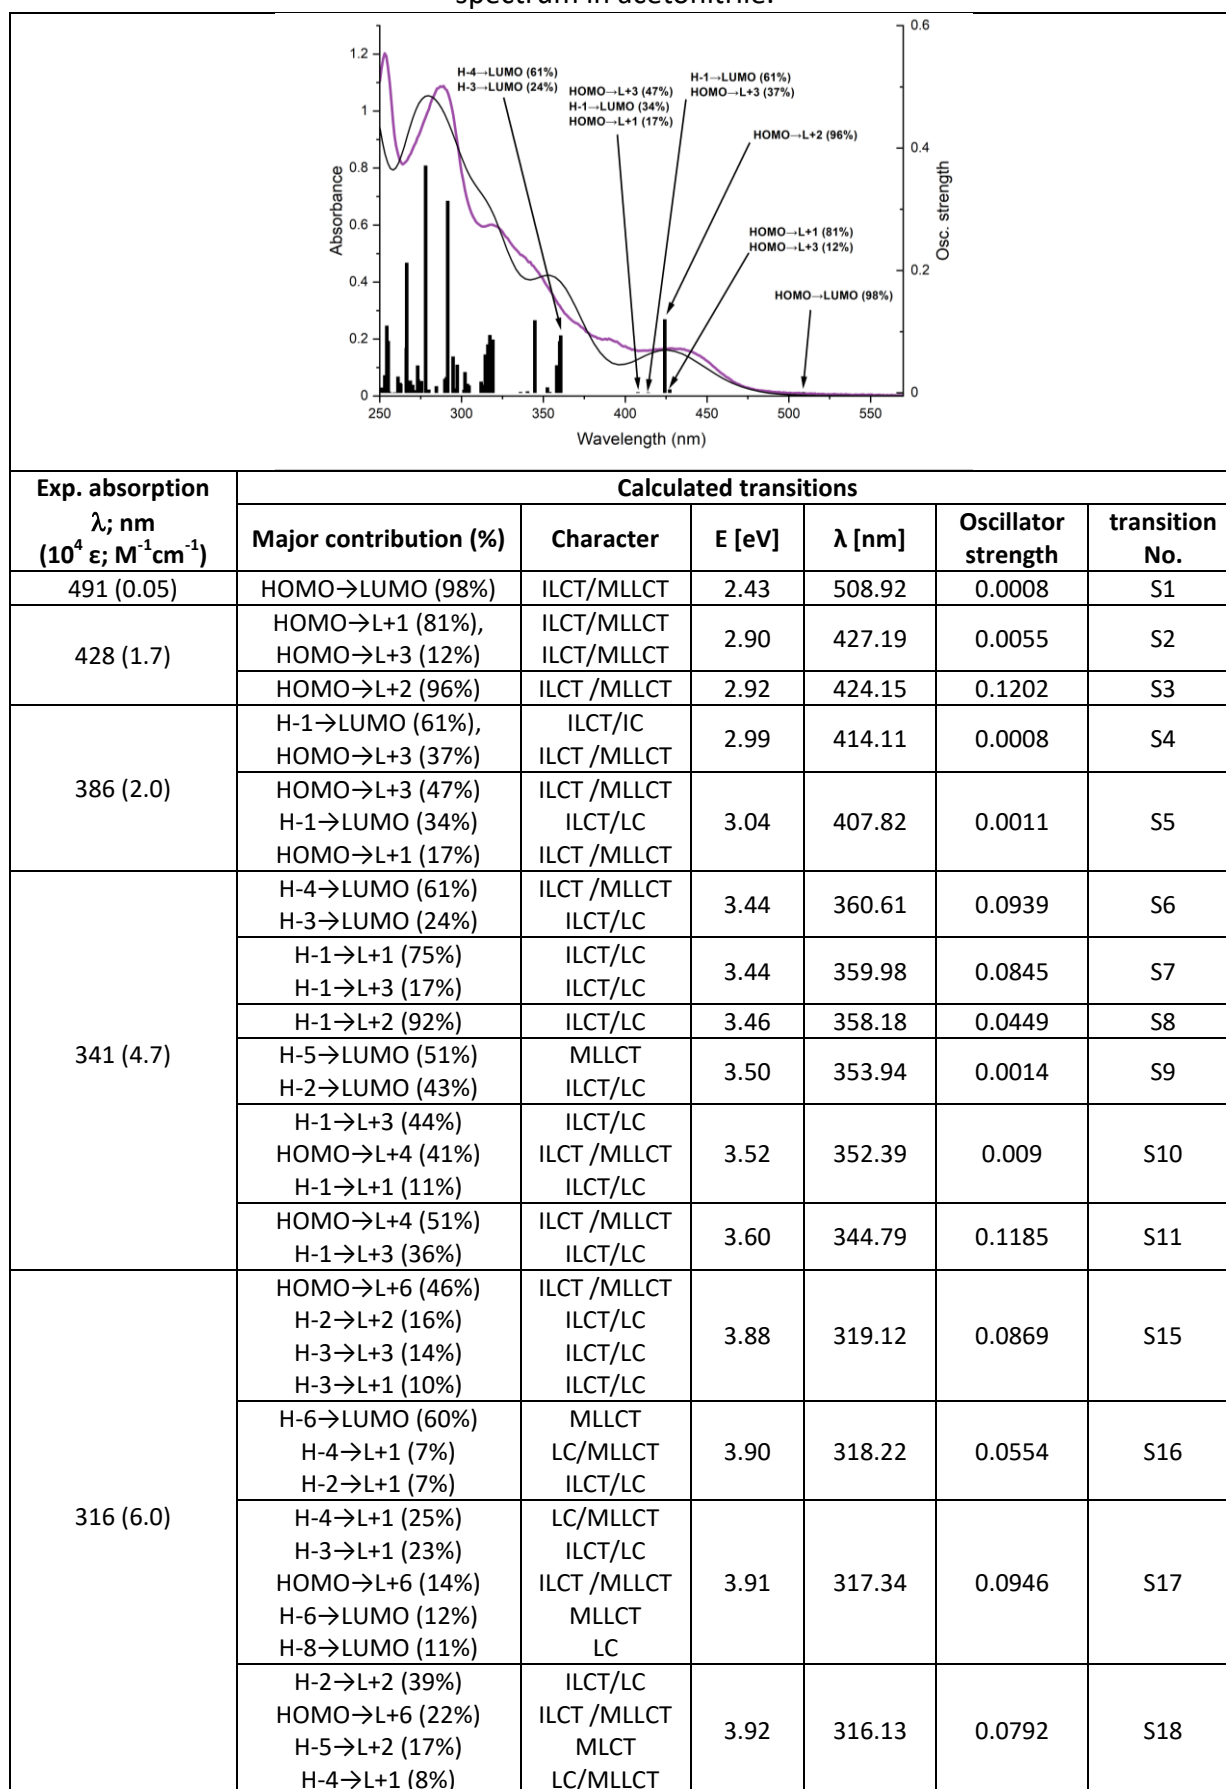

|          |                                                                 |                                         |      |        |        |     |
|----------|-----------------------------------------------------------------|-----------------------------------------|------|--------|--------|-----|
|          | H-1→L+5 (42%)<br>H-5→L+2 (25%)<br>H-4→L+3 (10%)                 | ILCT/LC<br>MLLCT<br>LC/MLLCT            | 4.10 | 302.06 | 0.0338 | S24 |
| 288 (11) | H-5→L+1 (37%)<br>H-2→L+3 (16%)<br>H-3→L+2 (13%)<br>H-4→L+2 (9%) | MLLCT<br>ILCT/LC<br>ILCT/LC<br>LC/MLLCT | 4.17 | 297.34 | 0.046  | S26 |
|          | H-1→L+5 (46%)<br>H-4→L+3 (17%)<br>H-5→L+2 (16%)                 | ILCT/LC<br>LC/MLLCT<br>MLLCT            | 4.25 | 291.55 | 0.3138 | S29 |
|          | H-8→LUMO (59%)<br>H-4→L+1 (20%)                                 | LC<br>LC/MLLCT                          | 4.46 | 278.05 | 0.3714 | S34 |
|          | H-7→L+2 (38%)<br>H-2→L+4 (28%)<br>HOMO→L+7 (9%)                 | MLLCT<br>ILCT/LC<br>ILCT /MLLCT         | 4.65 | 266.41 | 0.2125 | S42 |

**Table S10.** Comparison of the experimental luminescence and theoretical DFT properties for complexes **1-4**. The theoretical phosphorescence energies were calculated as the vertical energy difference between the ground singlet and triplet excited states  $\Delta E_{T_1-S_0}$  using Gaussian-16 software with PBE0/SDD/def2-TZVP level. The solvent environment (acetonitrile) was taken into account by PCM equilibrium solvation within the linear response approach.

| complex  | $\Delta E_{T_1-S_0}$<br>(eV) / (nm) | $\lambda_{exp}$ (nm) |
|----------|-------------------------------------|----------------------|
| <b>1</b> | 2.13 eV / 583 nm                    | 601                  |
| <b>2</b> | 2.04 eV / 608 nm                    | 562, 588             |
| <b>3</b> | 2.26 eV / 548 nm                    | 525, 563, 605        |
| <b>4</b> | 1.87 eV / 662 nm                    | 591, 640, 692        |

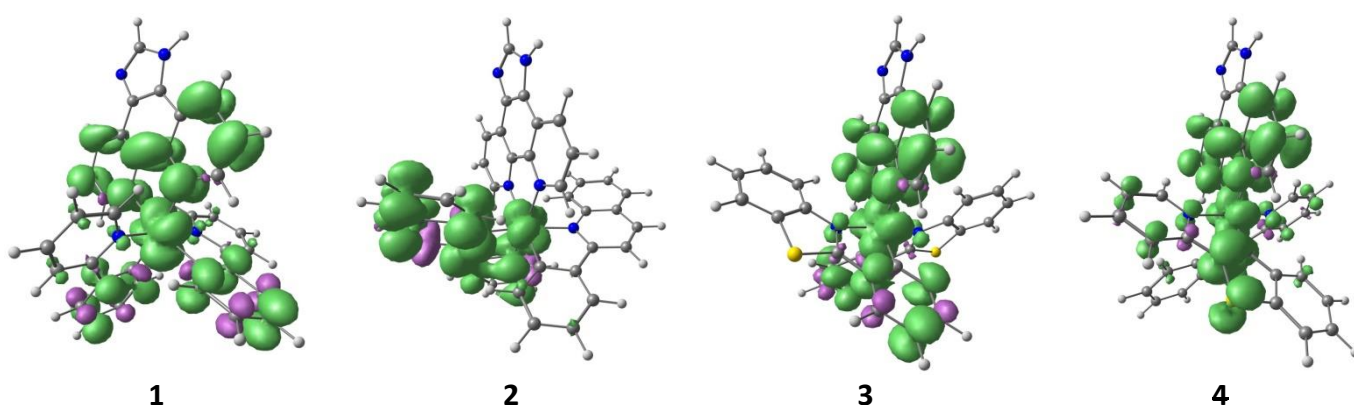

**Figure S12.** Spin density maps of complexes **1-4**, calculated with the Gaussian-16 software at TD-DFT/PBE1PBE/SDD/def2-TZVP level with the use of the PCM equilibrium solvation within the linear response approach at polarities corresponding to acetonitrile. The wavefunctions used for computing the spin densities refer to the optimized geometries at the  $T_1$  minima.

# ELECTROCHEMISTRY

**Table S11.** Electrochemical properties of ligands.

| Ligand  | $E_{pa}^{ox1}$<br>[V]                                                            | $E_{pa}^{ox2}$<br>[V] | $E_{pa}^{red1}$<br>[V] | $E_{pc}^{red1}$<br>[V] | $\Delta E^{red1}$<br>[V] | $E_{1/2}^{red1}$<br>[V] | $E_{pa}^{red2}$<br>[V] | $E_{pc}^{red2}$<br>[V] | $\Delta E^{red2}$<br>[V] | $E_{1/2}^{red2}$<br>[V] | $E_{onset}^{ox1}$<br>[V] | $E_{onset}^{red1}$<br>[V] | IP<br>[eV] | EA<br>[eV] |
|---------|----------------------------------------------------------------------------------|-----------------------|------------------------|------------------------|--------------------------|-------------------------|------------------------|------------------------|--------------------------|-------------------------|--------------------------|---------------------------|------------|------------|
| Hppy    | 1.64                                                                             | -                     | -2.82                  | -                      | -                        | -                       | -                      | -                      | -                        | -                       | 1.51                     | -2.61                     | 6.61       | 2.49       |
| Hpquin  | 1.44                                                                             | -                     | -2.41                  | -                      | -                        | -                       | -                      | -                      | -                        | -                       | 1.37                     | -2.29                     | 6.47       | 2.81       |
| Hpbztz  | 1.46                                                                             | 1.69                  | -2.44                  | -2.36                  | 0.81                     | -2.40                   | -2.82                  | -                      | -                        | -                       | 1.36                     | -2.34                     | 6.46       | 2.76       |
| pybztzH | 1.13                                                                             | 1.46                  | -2.53                  | -2.42                  | 0.12                     | -2.47                   | -2.76                  | -2.60                  | 0.16                     | 2.68                    | 1.04                     | -2.41                     | 6.14       | 2.69       |
| imphen  | electrochemical peaks were not registered due to poor solubility of the compound |                       |                        |                        |                          |                         |                        |                        |                          |                         |                          |                           |            |            |

$E_{pa}$  and  $E_{pc}$  – anodic and cathodic potentials vs  $Fc/Fc^+$ ;  $\Delta E$  - peak potential difference estimated from equation  $\Delta E = E_{pa}^{red1} - E_{pc}^{red1}$ ;  $E_{1/2}$  – redox potentials estimated from equation  $E_{1/2} = (E_{pa} + E_{pc})/2$ ;  $E_{onset}^{ox1}$  - oxidation onset potential;  $E_{onset}^{red1}$  - reduction onset potential; IP - Ionization Potential estimated from equation  $IP = |e^-|(5.1 + E_{onset}^{ox1})$ ; EA - Electron Affinity estimated from equation  $EA = |e^-|(5.1 + E_{onset}^{red1})$ ; CG working electrode, electrolyte: MeCN/ $Bu_4NPF_6$ ; scan rate  $0.1 \text{ V} \cdot \text{s}^{-1}$

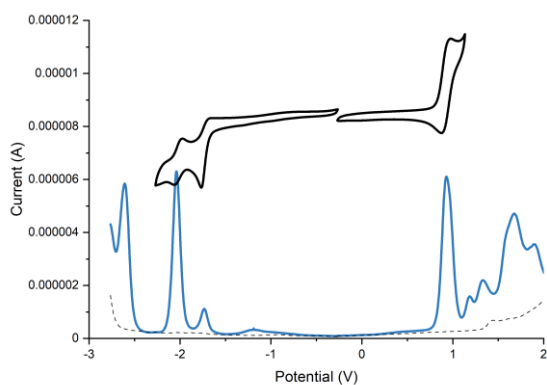

**1**

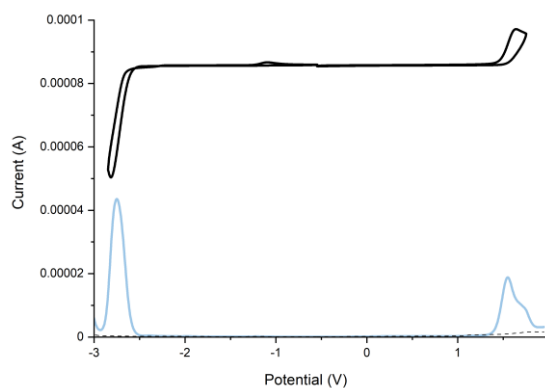

**Hppy**

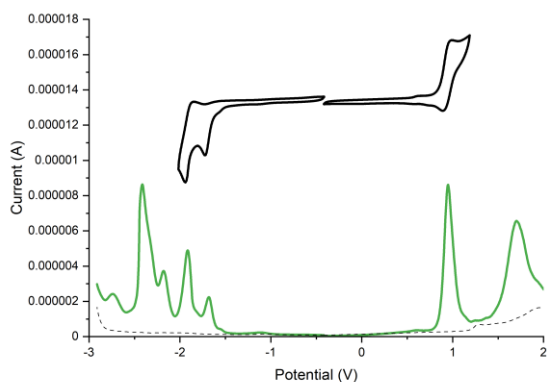

**2**

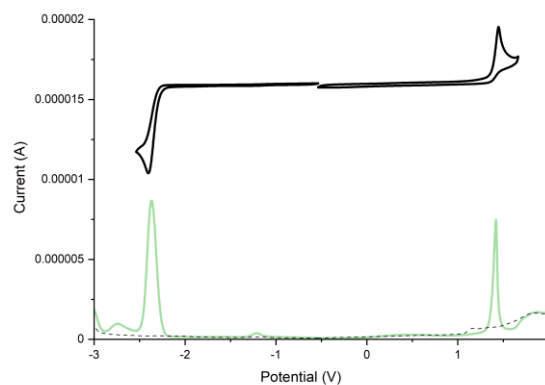

**Hpquin**

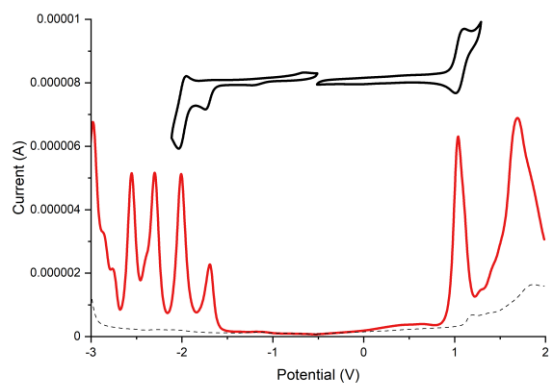

**3**

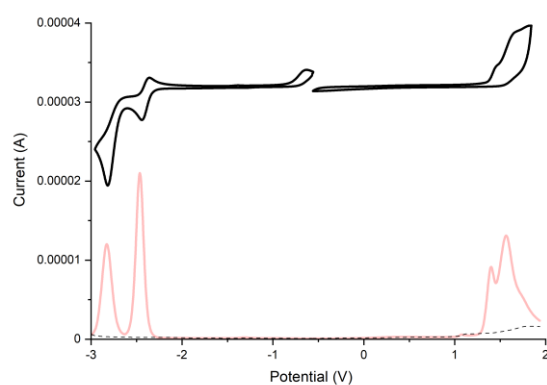

**Hpbztz**

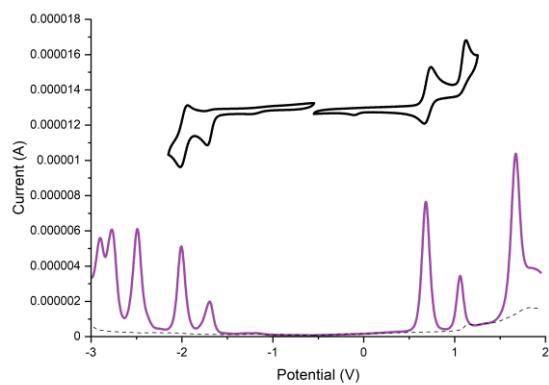

**4**

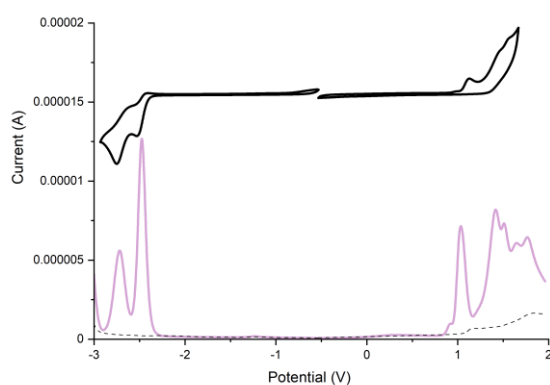

**pybztzH**

**Figure S13.** Cyclic voltammetry and differential pulse voltammetry of the complexes **1–4** and their respective cyclometalating ligands in the solution MeCN/Bu<sub>4</sub>NPF<sub>6</sub>; scan rate 0.1 V · s<sup>-1</sup>

## SPECTROSCOPY

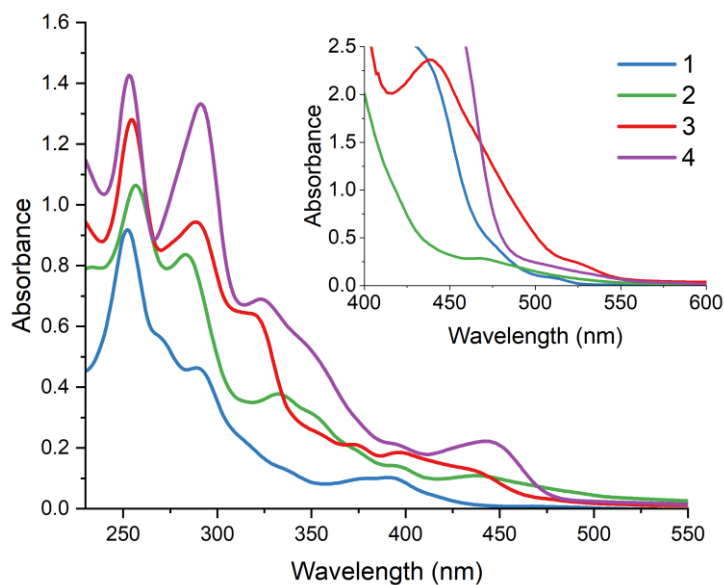

**Figure S14.** UV-Vis spectra in dichloromethane ( $c = 10^{-5}$  M, Inset:  $c = 5 \times 10^{-4}$  M).

**Table S12.** The absorption maxima and molar extinction coefficients of compounds **1–4**.

| compound | medium                          | $\lambda_{\text{abs}} (\epsilon \times 10^4)$                                                      |
|----------|---------------------------------|----------------------------------------------------------------------------------------------------|
| <b>1</b> | MeCN                            | 462 (0.08), 387 (1.1), 333 (1.5), 314 (2.5), 288 (5.5), 252 (11)                                   |
|          | CH <sub>2</sub> Cl <sub>2</sub> | 504 (0.02), 473 (0.10), 390 (1.0), 288 (4.6), 268 (5.7), 252 (9.2)                                 |
| <b>2</b> | MeCN                            | 514 (0.07), 434 (0.83), 390 (1.1), 348 (3.0), 330 (3.5), 281 (7.8), 255 (11), 233 (15)             |
|          | CH <sub>2</sub> Cl <sub>2</sub> | 467 (0.06), 437 (1.1), 392 (1.4), 333 (3.8), 283 (8.4), 257 (11)                                   |
| <b>3</b> | MeCN                            | 503 (0.02), 427 (0.72), 368 (1.1), 344 (1.7), 316 (4.5), 283 (5.2), 268 (5.9), 253 (7.9), 234 (14) |
|          | CH <sub>2</sub> Cl <sub>2</sub> | 519 (0.05), 438 (0.47), 397 (1.8), 372 (2.1), 316 (6.4), 288 (9.4), 254 (13)                       |
| <b>4</b> | MeCN                            | 491 (0.05), 428 (1.7), 386 (2.0), 341 (4.7), 316 (6.0), 288 (11), 252 (11)                         |
|          | CH <sub>2</sub> Cl <sub>2</sub> | 506 (0.04), 442 (2.2), 391 (2.2), 323 (6.9), 291 (13), 253 (14)                                    |

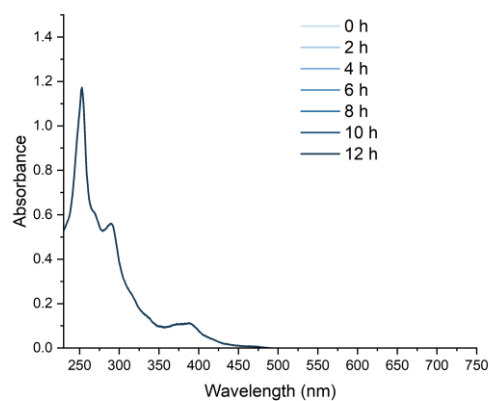

**1**

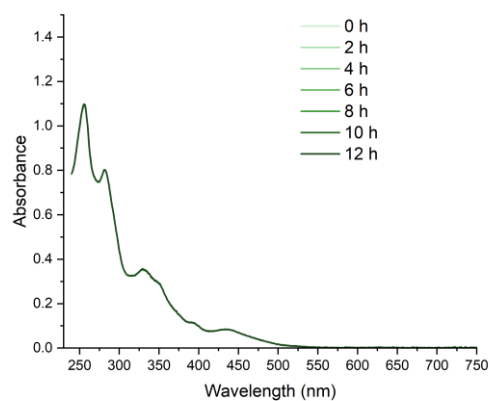

**2**

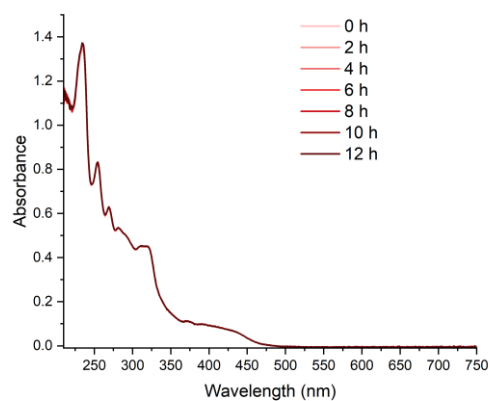

**3**

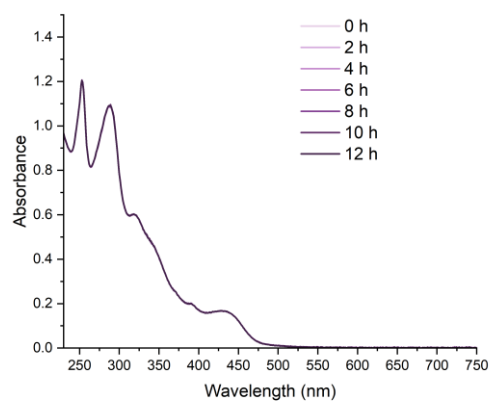

**4**

**Figure S15.** UV-Vis stability of Ir(III) complexes in MeCN.  $c = 10^{-5}$  M.

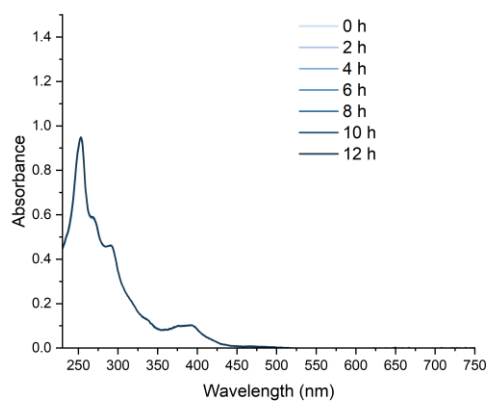

**1**

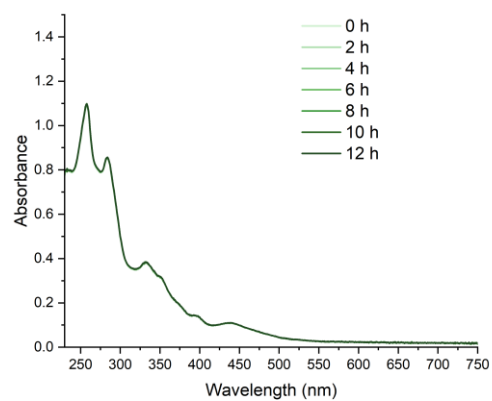

**2**

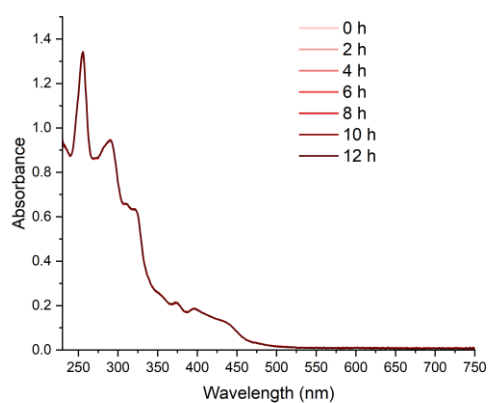

**3**

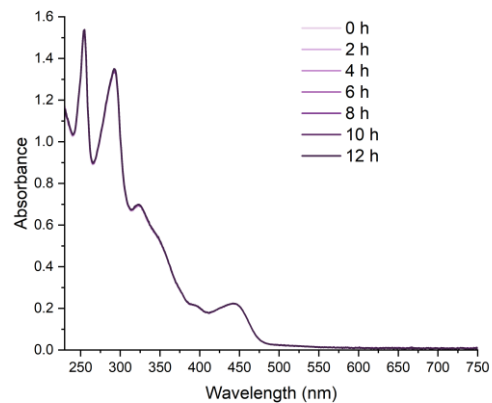

**4**

**Figure S16.** UV-Vis stability of Ir(III) complexes in CH<sub>2</sub>Cl<sub>2</sub>.  $c = 10^{-5}$  M.

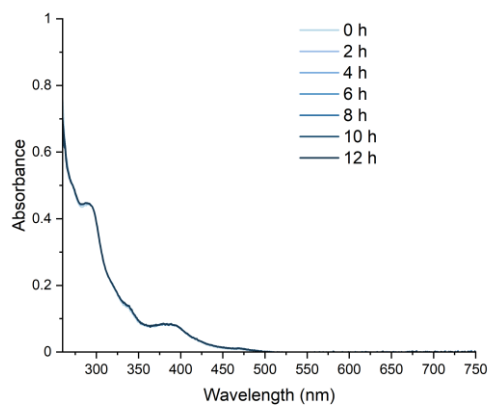

**1**

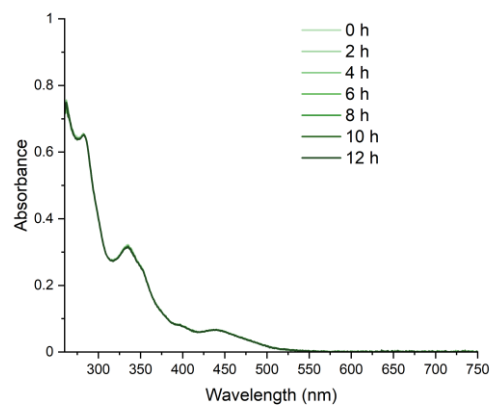

**2**

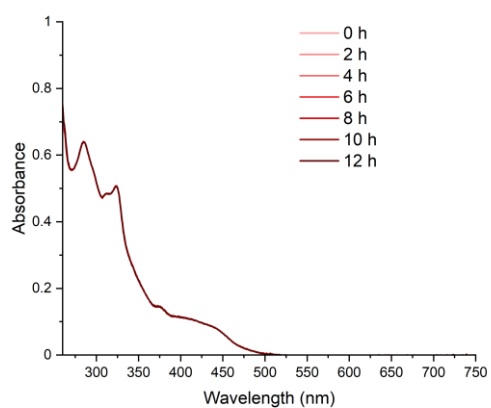

**3**

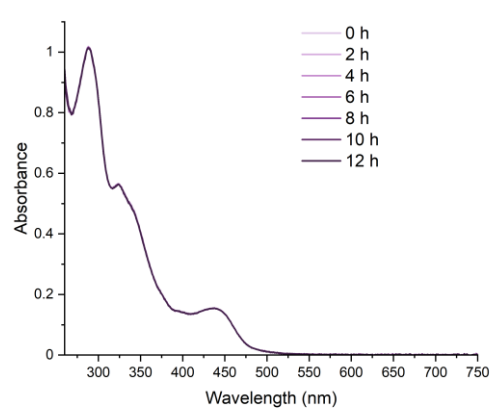

**4**

**Figure S17.** UV-Vis stability of Ir(III) complexes in DMSO.  $c = 10^{-5}$  M.

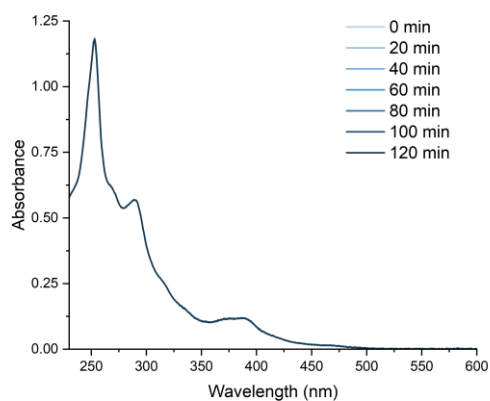

**1**

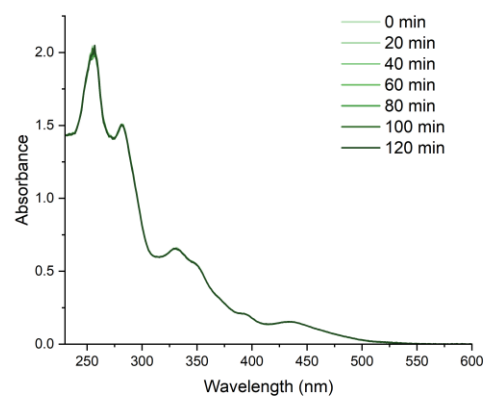

**2**

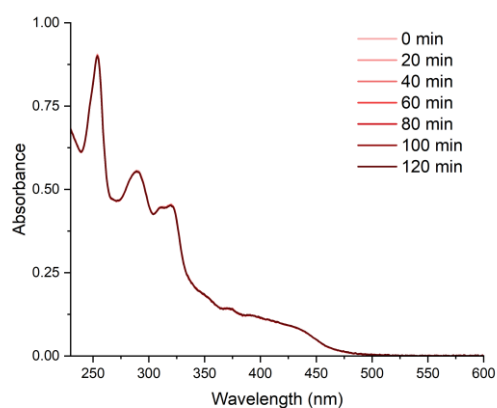

**3**

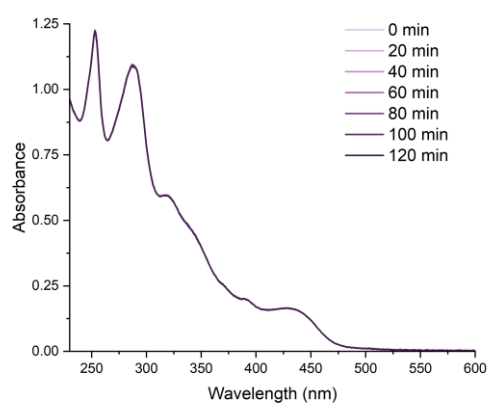

**4**

**Figure S18.** UV-Vis photostability of Ir(III) complexes upon 420 nm light irradiation in MeCN.  
 $c = 10^{-5}$  M.

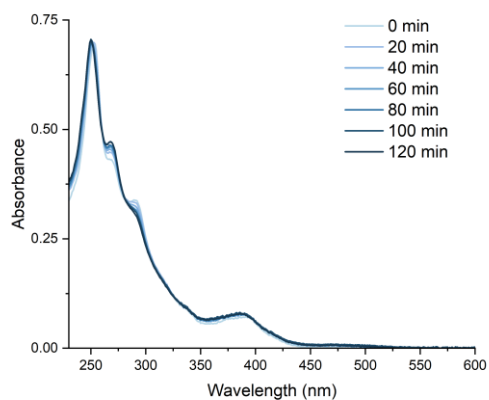

**1**

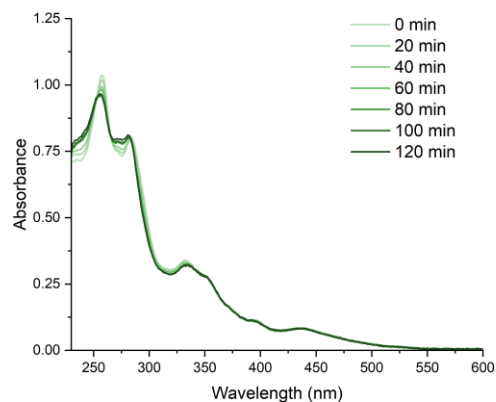

**2**

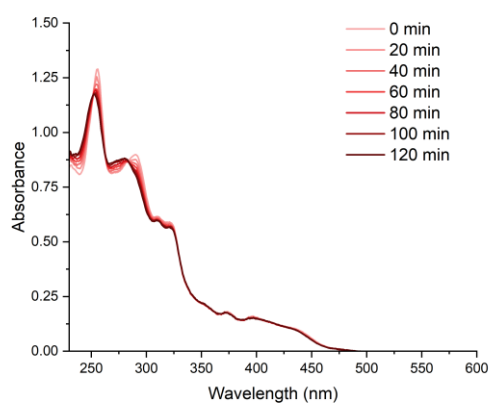

**3**

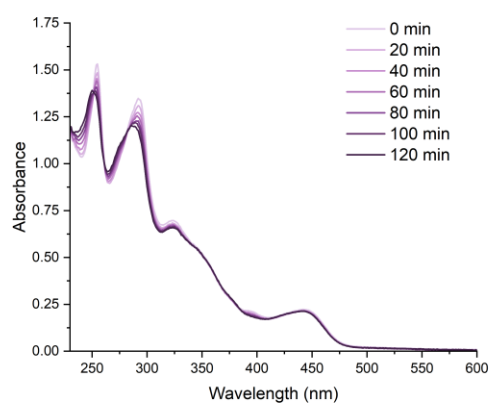

**4**

**Figure S19.** UV-Vis photostability of Ir(III) complexes upon 420 nm light irradiation in  $\text{CH}_2\text{Cl}_2$ .  
 $c = 10^{-5}$  M.

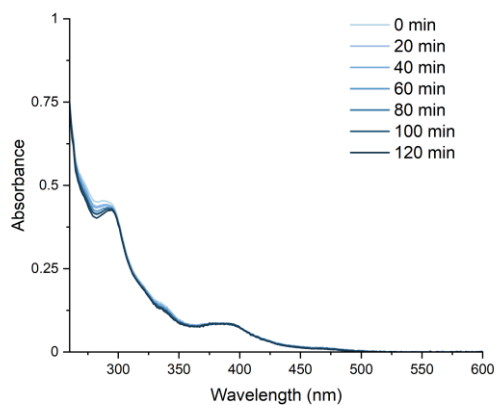

**1**

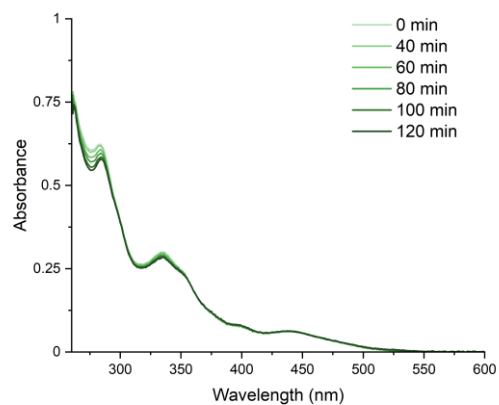

**2**

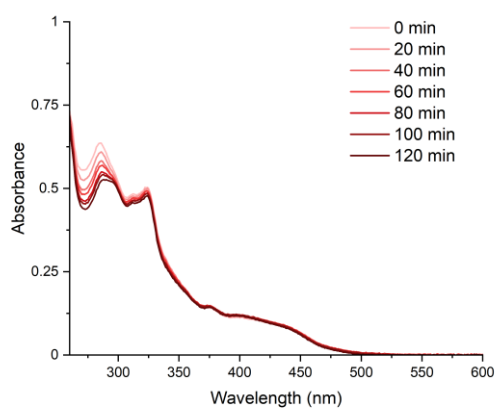

**3**

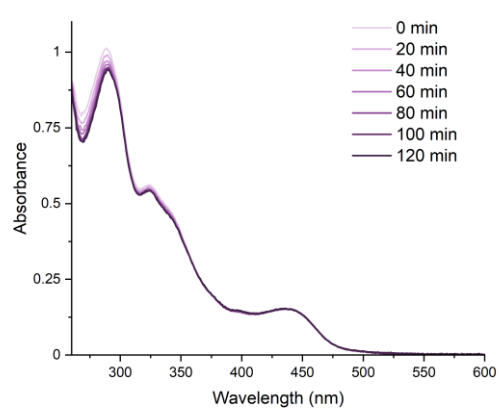

**4**

**Figure S20.** UV-Vis photostability of Ir(III) complexes upon 420 nm light irradiation in DMSO.  
 $c = 10^{-5}$  M.

**Table S13.** Summary of the absorption and luminescence properties of **1–4**.

| compound | medium                          | $\lambda_{\text{exc}}$            | $\lambda_{\text{em}}$        | PL lifetime (ns)                                                                                                                    | $\chi^2$       | ns-TA lifetime ( $\mu\text{s}$ )                              | QY (%)                                | $k_r$ ( $10^5 \text{ s}^{-1}$ ) <sup>b</sup> | $k_{nr}$ ( $10^5 \text{ s}^{-1}$ ) <sup>b</sup> |
|----------|---------------------------------|-----------------------------------|------------------------------|-------------------------------------------------------------------------------------------------------------------------------------|----------------|---------------------------------------------------------------|---------------------------------------|----------------------------------------------|-------------------------------------------------|
| <b>1</b> | MeCN                            | 387, 371, 292, 250                | 601                          | <b>Ar:</b> 743<br><b>Air:</b> 151                                                                                                   | 1.049<br>0.989 | <b>Ar:</b> $0.612 \pm 0.029$<br><b>Air:</b> $0.069 \pm 0.005$ | <b>Ar:</b> 21.23<br><b>Air:</b> 6.85  | 2.86                                         | 10.6                                            |
|          | CH <sub>2</sub> Cl <sub>2</sub> | 392, 372, 292, 254                | 591                          | <b>Ar:</b> 1296<br><b>Air:</b> 418                                                                                                  | 1.026<br>1.067 | –                                                             | <b>Ar:</b> 36.42<br><b>Air:</b> 7.08  | 2.81                                         | 4.91                                            |
|          | 77 K <sup>a</sup>               | 433, 407, 388, 368, 291           | 534                          | 4898 (67.8%), 9995 (32.2%) / $\tau_{\text{av}}$ : 6539                                                                              | 1.015          | –                                                             | –                                     | –                                            | –                                               |
|          | solid                           | 466, 364                          | 560                          | 206 (24.6%), 778 (61.2%), 3129 (14.2%) / $\tau_{\text{av}}$ : 971                                                                   | 1.002          | –                                                             | 8.05                                  | 0.83                                         | 9.5                                             |
| <b>2</b> | MeCN                            | 433, 387, 330, 237                | 562, 588sh                   | <b>Ar:</b> 1853<br><b>Air:</b> 446                                                                                                  | 1.044<br>0.928 | <b>Ar:</b> $2.191 \pm 0.206$<br><b>Air:</b> $0.198 \pm 0.004$ | <b>Ar:</b> 53.18<br><b>Air:</b> 7.94  | 2.87                                         | 2.53                                            |
|          | CH <sub>2</sub> Cl <sub>2</sub> | 438, 389, 333, 280, 258           | 556, 586sh                   | <b>Ar:</b> 3029<br><b>Air:</b> 253 (2.0%), 1183 (98.0%) / $\tau_{\text{av}}$ : 1164                                                 | 1.088<br>1.037 | –                                                             | <b>Ar:</b> 56.40<br><b>Air:</b> 30.25 | 1.86                                         | 1.44                                            |
|          | 77 K <sup>a</sup>               | 440, 408, 389, 369, 350, 332, 291 | 540, 584, 632                | 4524 (96.4%), 11 331 (3.6%) / $\tau_{\text{av}}$ : 4769                                                                             | 0.911          | –                                                             | –                                     | –                                            | –                                               |
|          | solid                           | 526, 473, 440, 370                | 588, 671                     | 232 (24.6%), 1716 (75.4%) / $\tau_{\text{av}}$ : 1351                                                                               | 1.054          | –                                                             | 1.51                                  | 0.11                                         | 7.3                                             |
| <b>3</b> | MeCN                            | 389, 310, 292, 251                | 525, 563, 605                | <b>Ar:</b> 3840<br><b>Air:</b> 618                                                                                                  | 1.042<br>1.150 | <b>Ar:</b> $3.148 \pm 0.130$<br><b>Air:</b> $0.269 \pm 0.006$ | <b>Ar:</b> 33.62<br><b>Air:</b> 5.35  | 0.88                                         | 1.73                                            |
|          | CH <sub>2</sub> Cl <sub>2</sub> | 430, 396, 312, 293, 254           | 522, 562, 602                | <b>Ar:</b> 3467<br><b>Air:</b> 1243                                                                                                 | 1.047<br>1.062 | –                                                             | <b>Ar:</b> 36.64<br><b>Air:</b> 19.85 | 1.06                                         | 1.83                                            |
|          | 77 K <sup>a</sup>               | 434, 409, 392, 372, 317, 295      | 514, 526, 554, 570, 603, 658 | 11 663                                                                                                                              | 1.003          | –                                                             | –                                     | –                                            | –                                               |
|          | solid                           | 512, 488, 368, 311                | 576, 619                     | 178 (23.1%), 558 (56.7%), 1955 (20.2%) / $\tau_{\text{av}}$ : 752                                                                   | 1.031          | –                                                             | 3.36                                  | 0.45                                         | 12.8                                            |
| <b>4</b> | MeCN                            | 426, 324, 296, 260                | 591, 640, 692                | <b>Ar:</b> 1365 (93.0%), 4779 (7.0%) / $\tau_{\text{av}}$ : 1604<br><b>Air:</b> 247 (21.7%), 386 (78.3%) / $\tau_{\text{av}}$ : 356 | 1.032<br>1.084 | <b>Ar:</b> $0.799 \pm 0.037$<br><b>Air:</b> $0.157 \pm 0.005$ | <b>Ar:</b> 2.08<br><b>Air:</b> 5.83   | 0.13                                         | 6.10                                            |
|          | CH <sub>2</sub> Cl <sub>2</sub> | 441, 324, 296, 255                | 597, 644, 692                | <b>Ar:</b> 943 (64.1%), 1941 (35.9%) / $\tau_{\text{av}}$ : 1301<br><b>Air:</b> 297 (14.6%), 679 (85.4%) / $\tau_{\text{av}}$ : 623 | 1.044<br>0.975 | –                                                             | <b>Ar:</b> 7.69<br><b>Air:</b> 5.53   | 0.59                                         | 7.10                                            |
|          | 77 K <sup>a</sup>               | 444, 422, 389, 320, 290, 254      | 580, 633, 697                | 13 378                                                                                                                              | 0.952          | –                                                             | –                                     | –                                            | –                                               |
|          | solid                           | 565, 500, 417, 368, 303           | 649, 673, 694                | 220 (44.0%), 1243 (26.3%), 5934 (29.8%) / $\tau_{\text{av}}$ : 2192                                                                 | 1.082          | –                                                             | 0.72                                  | 0.03                                         | 4.5                                             |

<sup>a</sup> 77 K – measurement in EtOH:MeOH (4:1 v/v) rigid matrix. <sup>b</sup> Correlation between emission lifetimes ( $\tau$ ), quantum yields (QY) and their radiative and non-radiative constants ( $k_r$  and  $k_{nr}$ ) were calculated according to the equations:  $\tau = \frac{1}{k_r + k_{nr}}$  and  $QY = \frac{k_r}{k_r + k_{nr}}$ .  $k_r$  and  $k_{nr}$  were calculated:  $k_r = \frac{QY}{\tau}$  and  $k_{nr} = \frac{1-QY}{\tau}$

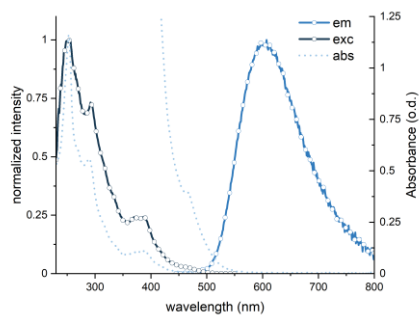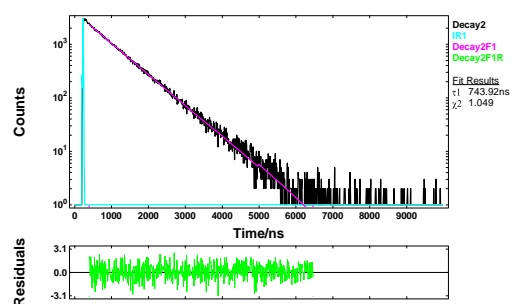

MeCN

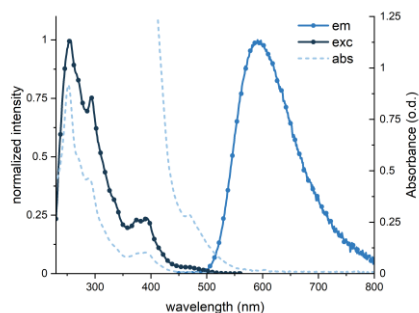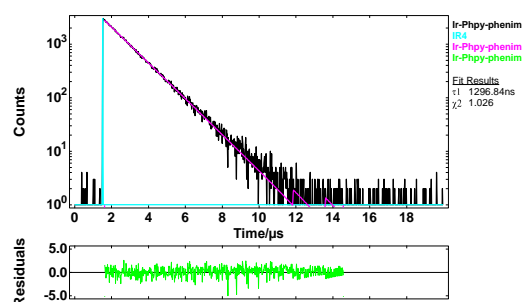

CH<sub>2</sub>Cl<sub>2</sub>

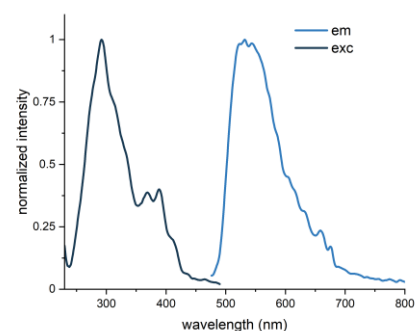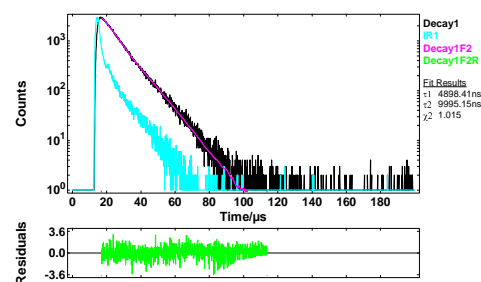

Fit Parameters

$$\text{Fit} = A + B1 \cdot \exp(-t/T1) + B2 \cdot \exp(-t/T2)$$

|       | Value     | Std Dev  |    | Value     | Std Dev  | Rel % |
|-------|-----------|----------|----|-----------|----------|-------|
| T1    | 4.898E-6  | 1.610E-7 | B1 | 4.387E-2  | 1.559E-3 | 67.80 |
| T2    | 9.995E-6  | 3.760E-7 | B2 | 1.021E-2  | 1.582E-3 | 32.20 |
| Chisq | 1.015E+0  |          | A  | -5.840E-1 |          |       |
| Shift | -2.928E-7 |          |    |           |          |       |

77 K (EtOH:MeOH 4:1 v/v)

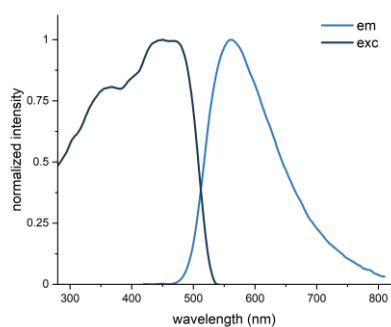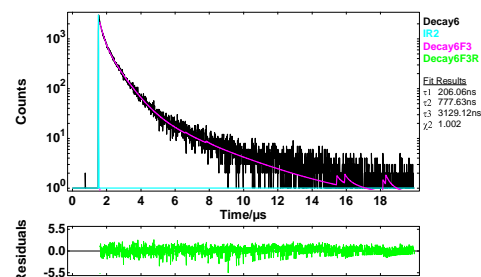

Fit Parameters

$$\text{Fit} = A + B1 \cdot \exp(-t/T1) + B2 \cdot \exp(-t/T2) + B3 \cdot \exp(-t/T3)$$

|       | Value     | Std Dev  |    | Value    | Std Dev  | Rel % |
|-------|-----------|----------|----|----------|----------|-------|
| T1    | 2.061E-7  | 7.365E-9 | B1 | 3.912E-1 | 2.534E-2 | 24.64 |
| T2    | 7.776E-7  | 1.800E-8 | B2 | 2.573E-1 | 9.075E-3 | 61.15 |
| T3    | 3.129E-6  | 1.447E-7 | B3 | 1.485E-2 | 1.406E-3 | 14.21 |
| Chisq | 1.002E+0  |          | A  | 5.230E-1 |          |       |
| Shift | -4.921E-8 |          |    |          |          |       |

solid

Figure S21. Summary of photoluminescence properties of complex 1.

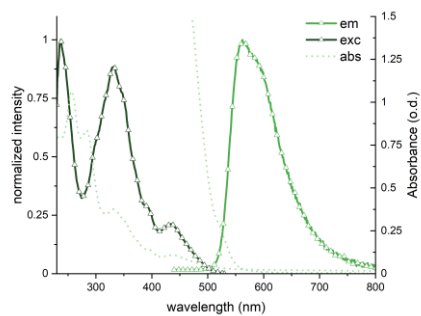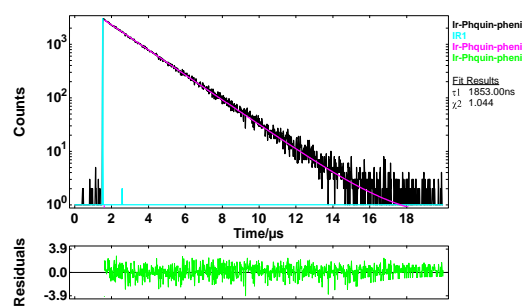

MeCN

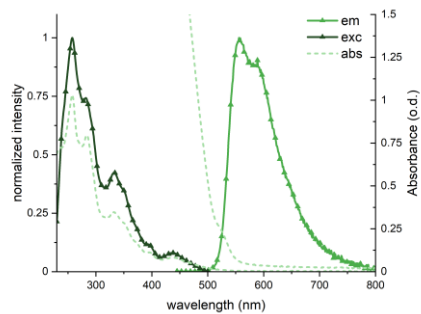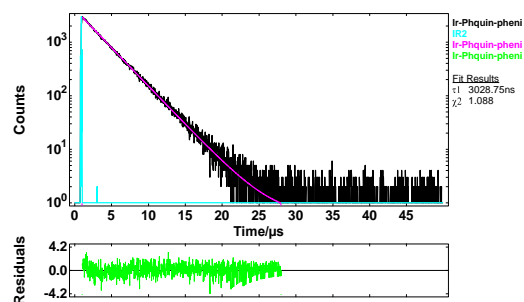

CH<sub>2</sub>Cl<sub>2</sub>

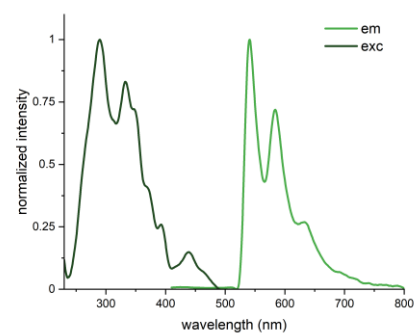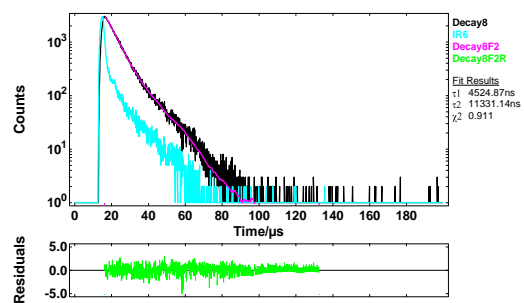

Fit Parameters

$$\text{Fit} = A + B1 \cdot \exp(-t/T1) + B2 \cdot \exp(-t/T2)$$

|       | Value    | Std Dev  |    | Value     | Std Dev  | Rel % |
|-------|----------|----------|----|-----------|----------|-------|
| T1    | 4.525E-6 | 5.788E-8 | B1 | 6.011E-2  | 6.622E-4 | 96.43 |
| T2    | 1.133E-5 | 1.884E-6 | B2 | 8.876E-4  | 5.346E-4 | 3.57  |
| Chisq | 9.114E-1 |          | A  | -5.800E-2 |          |       |
| Shift | 3.707E-8 |          |    |           |          |       |

77 K (EtOH:MeOH 4:1 v/v)

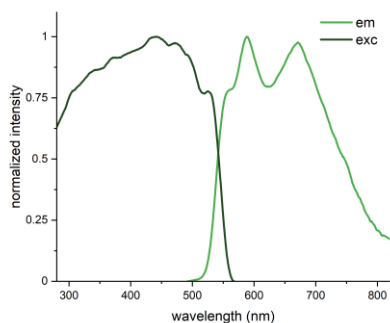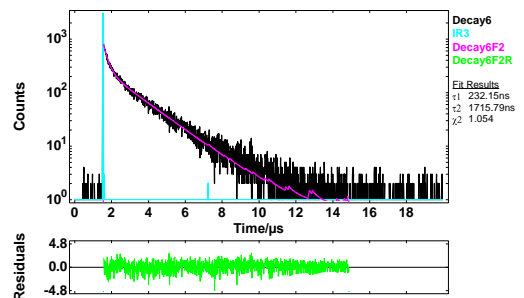

Fit Parameters

$$\text{Fit} = A + B1 \cdot \exp(-t/T1) + B2 \cdot \exp(-t/T2)$$

|       | Value    | Std Dev  |    | Value    | Std Dev  | Rel % |
|-------|----------|----------|----|----------|----------|-------|
| T1    | 2.321E-7 | 6.354E-9 | B1 | 1.788E-1 | 1.565E-2 | 24.60 |
| T2    | 1.716E-6 | 1.532E-8 | B2 | 7.414E-2 | 1.393E-3 | 75.40 |
| Chisq | 1.054E+0 |          | A  | 4.690E-1 |          |       |
| Shift | 1.356E-8 |          |    |          |          |       |

solid

Figure S22. Summary of photoluminescence properties of complex 2.

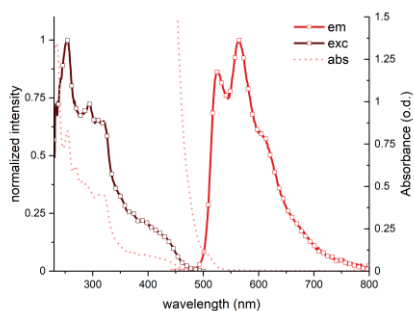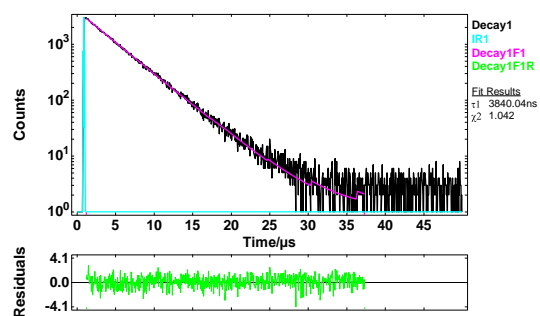

MeCN

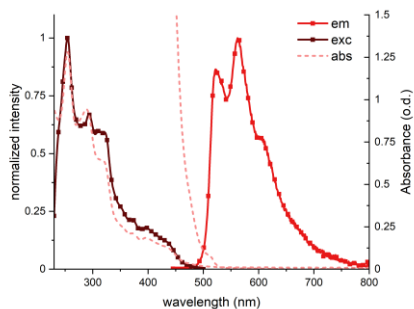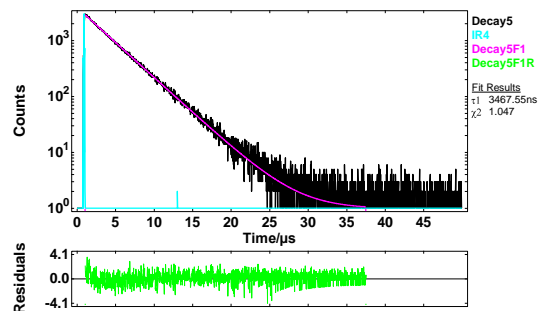

CH<sub>2</sub>Cl<sub>2</sub>

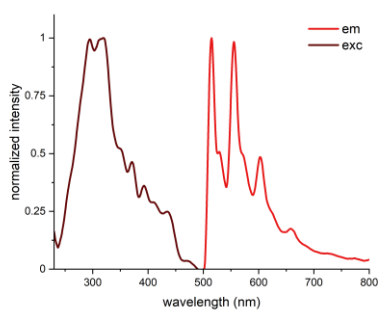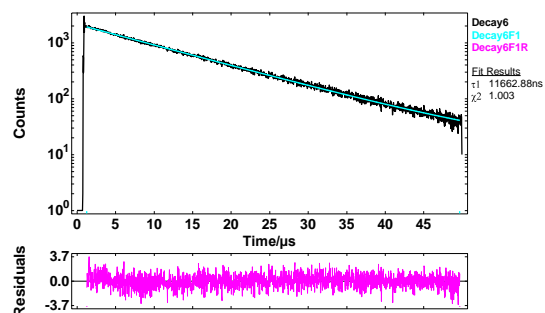

77 K (EtOH:MeOH 4:1 v/v)

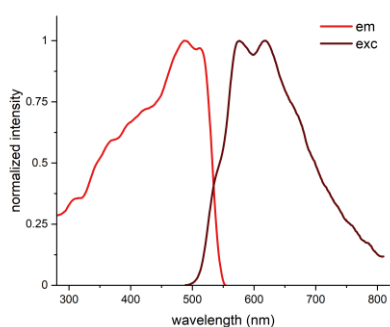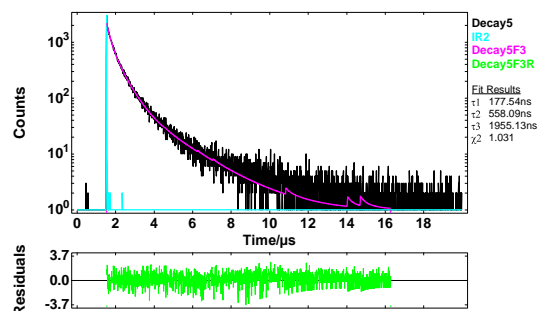

Fit Parameters

$$\text{Fit} = A + B1 \cdot \exp(-t/T1) + B2 \cdot \exp(-t/T2) + B3 \cdot \exp(-t/T3)$$

|       | Value    | Std Dev  |    | Value    | Std Dev  | Rel % |
|-------|----------|----------|----|----------|----------|-------|
| T1    | 1.775E-7 | 1.047E-8 | B1 | 3.193E-1 | 3.298E-2 | 23.14 |
| T2    | 5.581E-7 | 2.103E-8 | B2 | 2.488E-1 | 1.611E-2 | 56.66 |
| T3    | 1.955E-6 | 7.219E-8 | B3 | 2.532E-2 | 2.347E-3 | 20.20 |
| Chisq | 1.031E+0 |          | A  | 9.620E-1 |          |       |
| Shift | 3.658E-8 |          |    |          |          |       |

solid

**Figure S23.** Summary of photoluminescence properties of complex **3**.

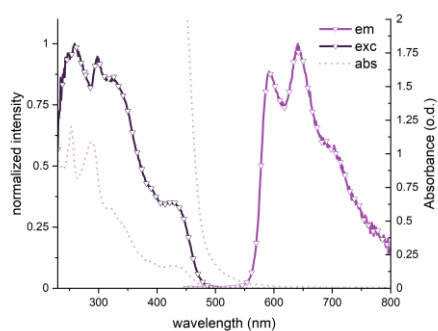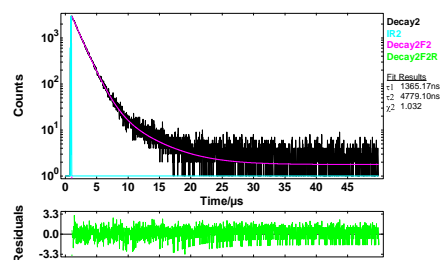

Fit Parameters

$$\text{Fit} = A + B1 \cdot \exp(-t/T1) + B2 \cdot \exp(-t/T2)$$

|       | Value    | Std Dev  |    | Value    | Std Dev  | Rel % |
|-------|----------|----------|----|----------|----------|-------|
| T1    | 1.365E-6 | 7.298E-9 | B1 | 5.292E-1 | 1.313E+0 | 93.02 |
| T2    | 4.779E-6 | 2.015E-7 | B2 | 1.134E-2 | 7.846E-3 | 6.98  |
| Chisq | 1.032E+0 |          | A  | 1.768E+0 |          |       |
| Shift | 1.904E-8 |          |    |          |          |       |

MeCN

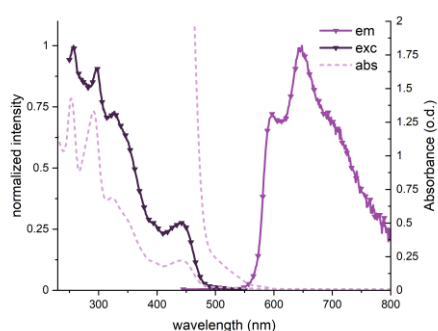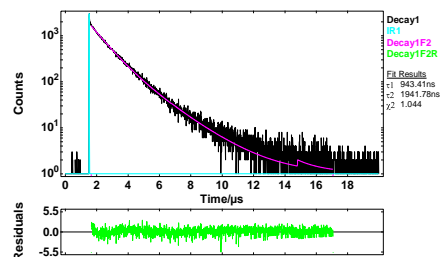

Fit Parameters

$$\text{Fit} = A + B1 \cdot \exp(-t/T1) + B2 \cdot \exp(-t/T2)$$

|       | Value     | Std Dev  |    | Value    | Std Dev  | Rel % |
|-------|-----------|----------|----|----------|----------|-------|
| T1    | 9.434E-7  | 2.001E-8 | B1 | 4.303E-1 | 2.279E-2 | 64.09 |
| T2    | 1.942E-6  | 6.198E-8 | B2 | 1.171E-1 | 1.376E-2 | 35.91 |
| Chisq | 1.044E+0  |          | A  | 1.042E+0 |          |       |
| Shift | -1.398E-8 |          |    |          |          |       |

CH<sub>2</sub>Cl<sub>2</sub>

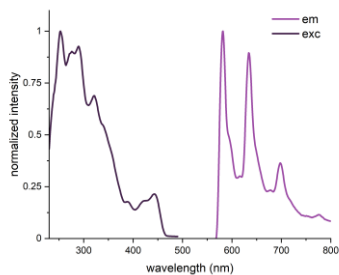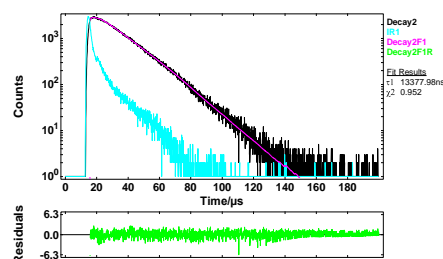

77 K (EtOH:MeOH 4:1 v/v)

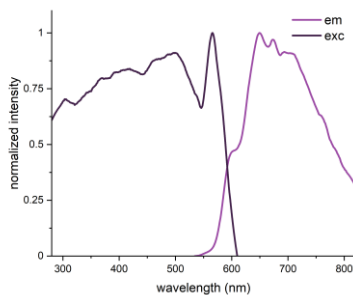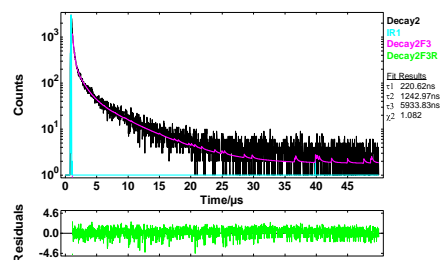

Fit Parameters

$$\text{Fit} = A + B1 \cdot \exp(-t/T1) + B2 \cdot \exp(-t/T2) + B3 \cdot \exp(-t/T3)$$

|       | Value     | Std Dev  |    | Value    | Std Dev  | Rel % |
|-------|-----------|----------|----|----------|----------|-------|
| T1    | 2.206E-7  | 8.308E-9 | B1 | 4.569E-1 | 5.072E-2 | 43.99 |
| T2    | 1.243E-6  | 7.264E-8 | B2 | 4.843E-2 | 3.408E-3 | 26.27 |
| T3    | 5.934E-6  | 1.774E-7 | B3 | 1.149E-2 | 6.497E-4 | 29.75 |
| Chisq | 1.082E+0  |          | A  | 1.749E+0 |          |       |
| Shift | -2.724E-9 |          |    |          |          |       |

solid

Figure S24. Summary of photoluminescence properties of complex 4.

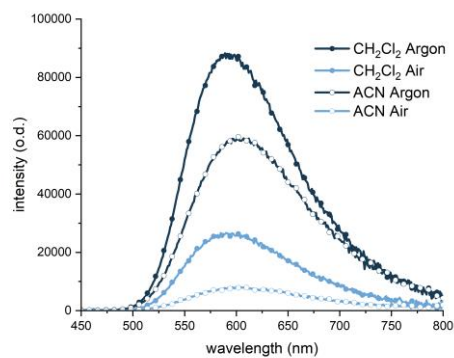

1

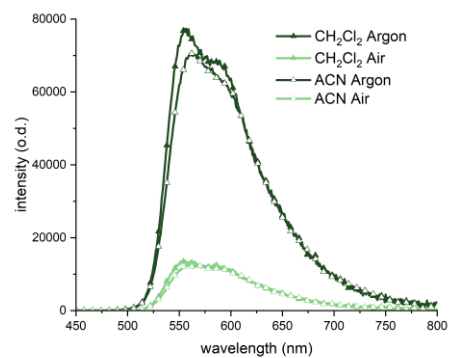

2

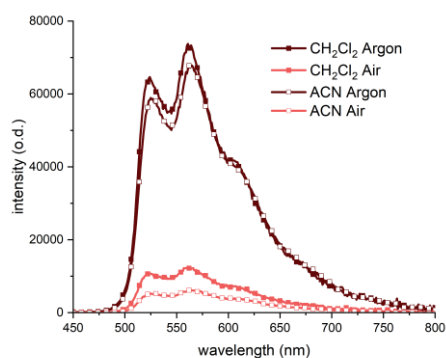

3

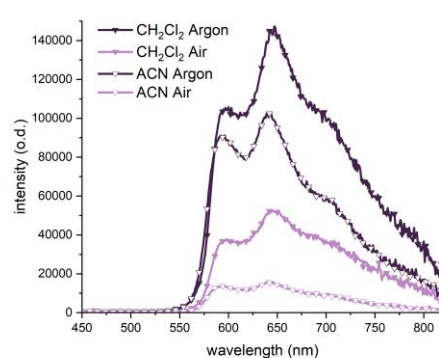

4

**Figure S25.** Emission spectra of Ir(III) complexes in argon-saturated and air-equilibrated dichloromethane and acetonitrile solutions upon excitation at 405 nm.

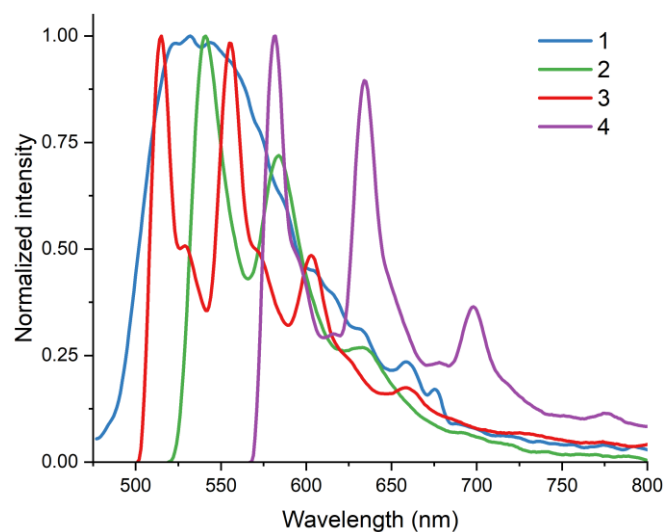

(a)

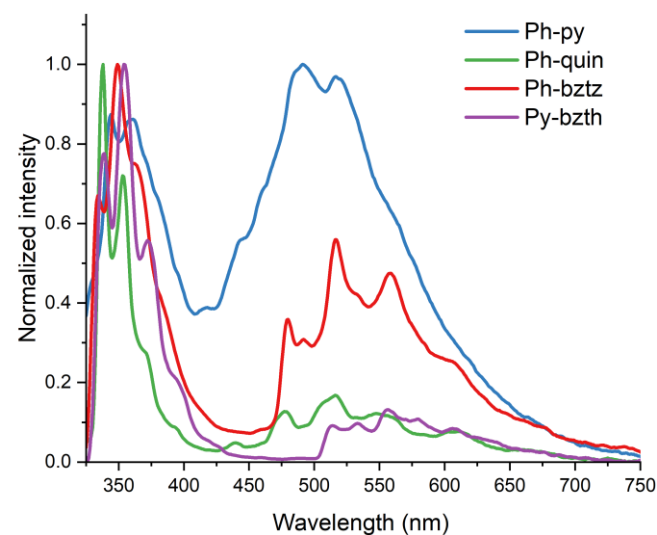

(b)

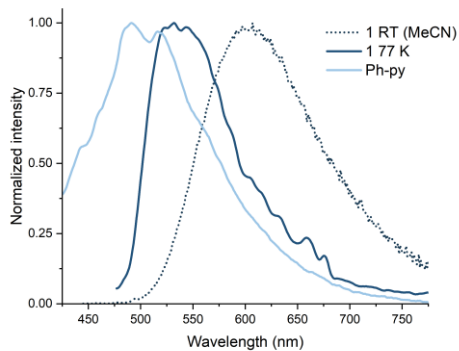

(c)

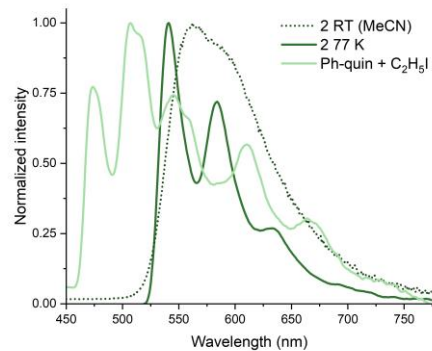

(d)

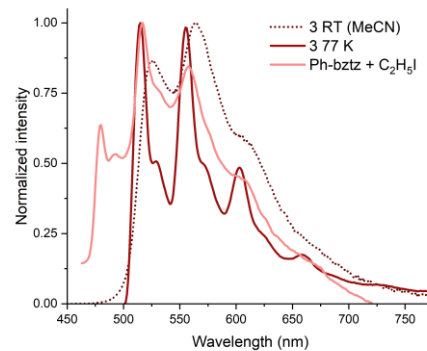

(e)

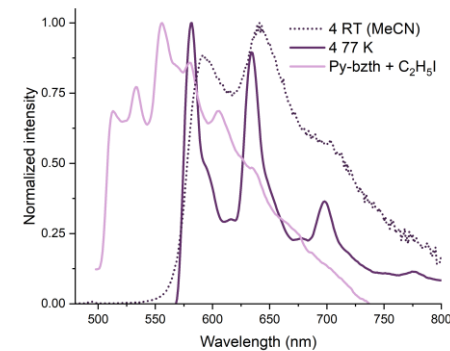

(f)

**Figure S26.** 77 K EtOH:MeOH (4:1 v/v) rigid matrix emission of complexes **1–4** (a), respective H(N<sup>⊖</sup>C) ligands (b), and comparison of the phosphorescence of the complex in RT and in 77 K vs 77 K phosphorescence of their respective ligands (c-f). In panels (d-f) ligands Ph-quin, Ph-bztz and Py-bzth were additionally sensitized towards phosphorescence with addition of 10% (v:v) of ethylene iodide.

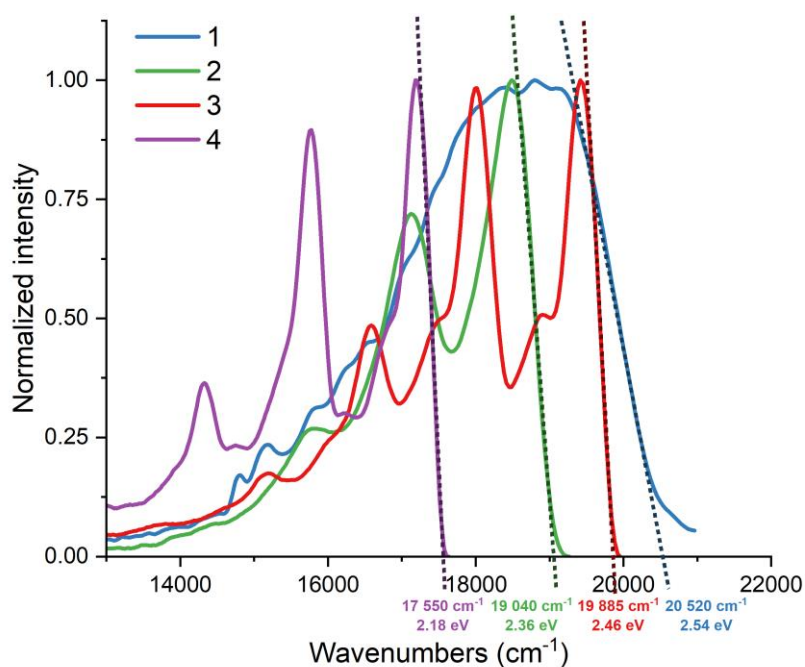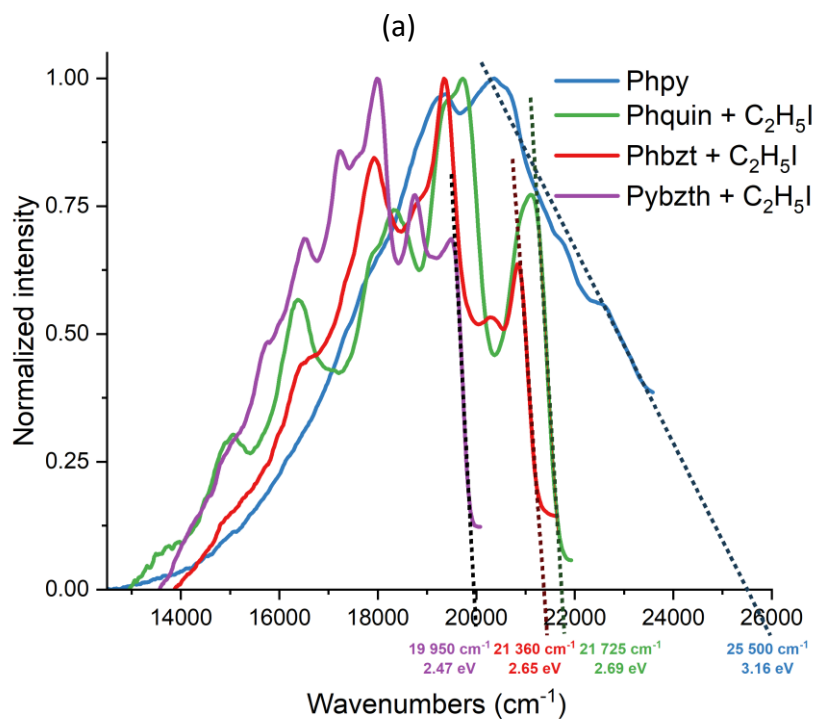

**Figure S27.** Phosphorescence emission of compounds **1–4** (a) and their respective H( $\text{N}^{\text{C}}$ ) ligands (b) in MeOH:EtOH (1:4 v:v) in 77 K, along with tangent lines computed by the linear fit of the high-energy side of the phosphorescence bands. Ligands Ph-quin, Ph-bztz and Py-bzth were additionally sensitized towards phosphorescence with addition of 10% (v:v) of ethylene iodide.

## FEMTO- and NANOSECOND TRANSIENT ABSORPTION

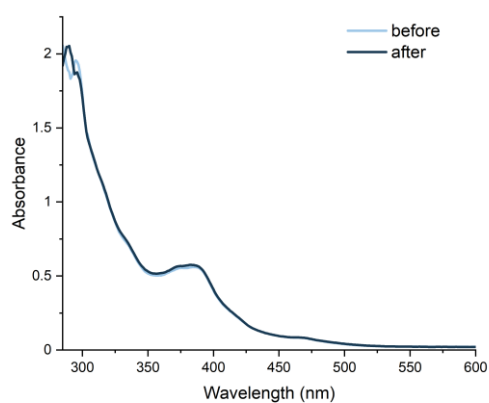

**1**

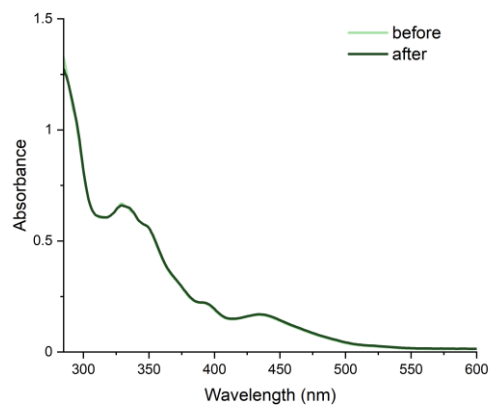

**2**

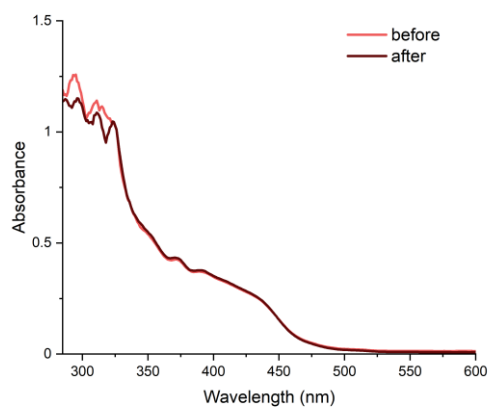

**3**

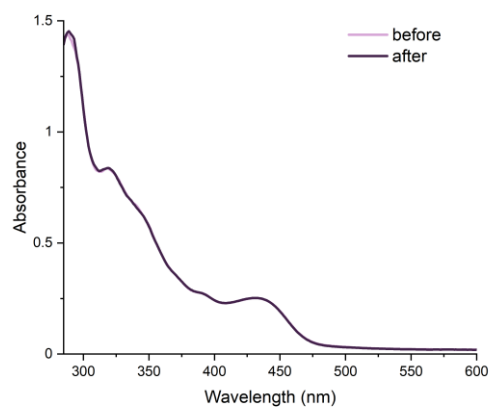

**4**

**Figure S28.** UV-Vis spectra of the acetonitrile solutions of **1–4** before and after their measurements of femtosecond transient absorption – photodamage test.

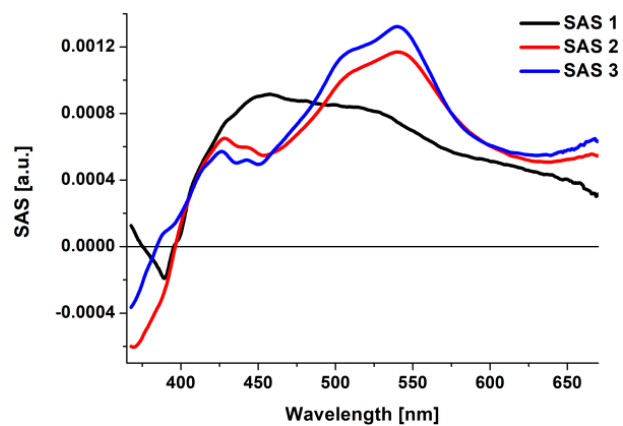

(a)

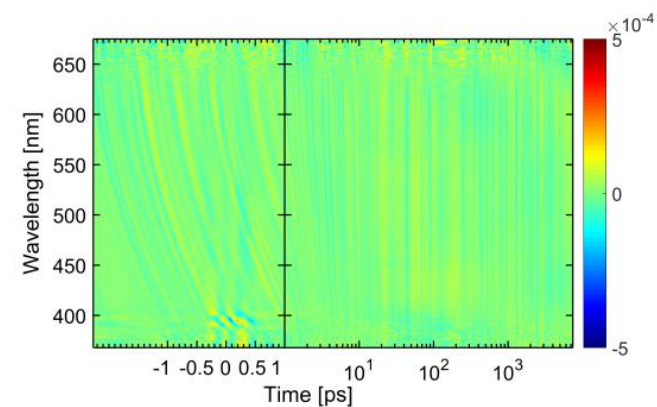

(b)

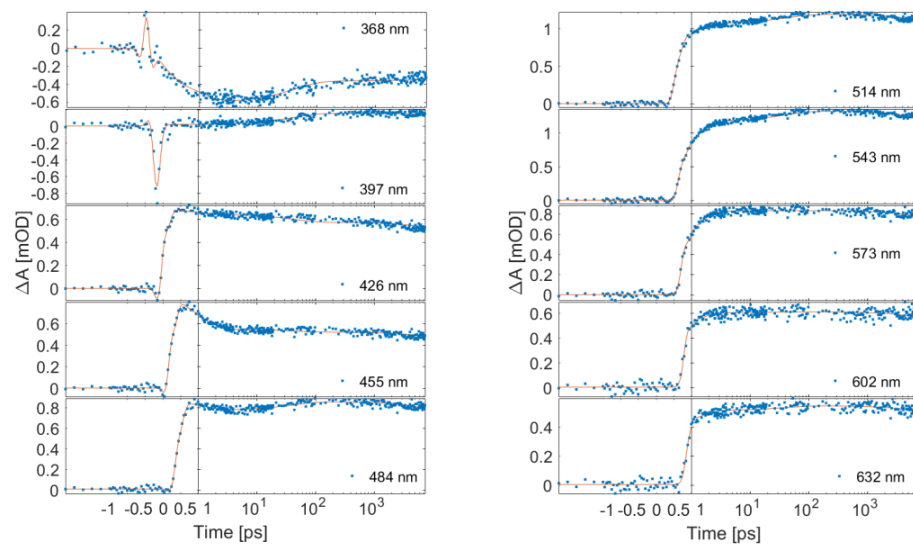

(c)

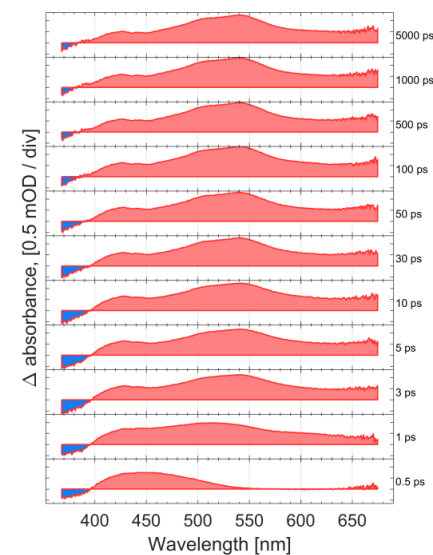

(d)

**Figure S29.** Summary of the global lifetime analysis of **1** (pump wavelength 355 nm; pump power 0.25  $\mu$ J per pulse, solvent: acetonitrile) containing evolution associated spectra (a), residual map (b), time traces at several wavelengths (c), and transient spectra (d).

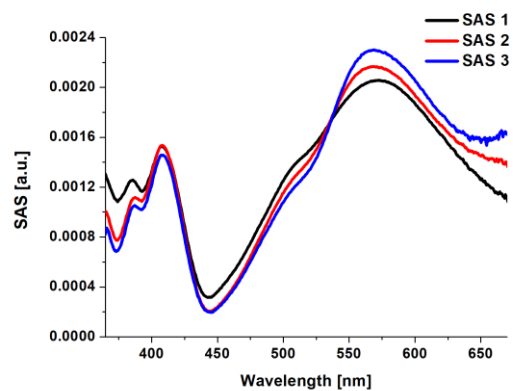

(a)

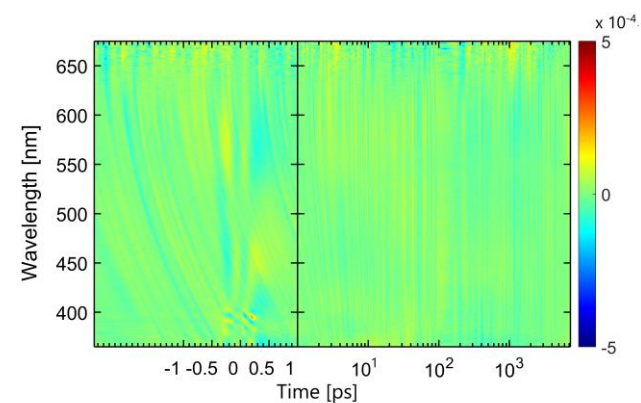

(b)

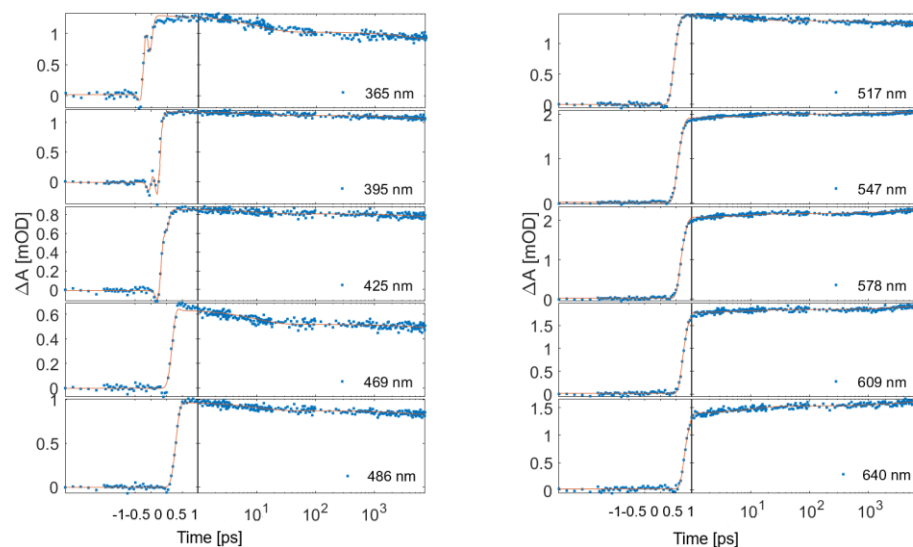

(c)

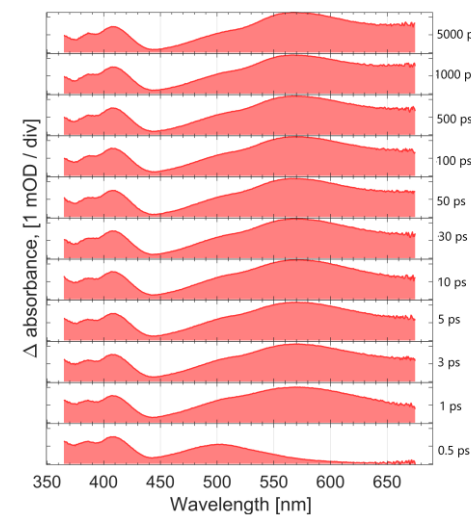

(d)

**Figure S30.** Summary of the global lifetime analysis of **2** (pump wavelength 355 nm; pump power 0.25  $\mu$ J per pulse, solvent: acetonitrile) containing evolution associated spectra (a), residual map (b), time traces at several wavelengths (c), and transient spectra (d).

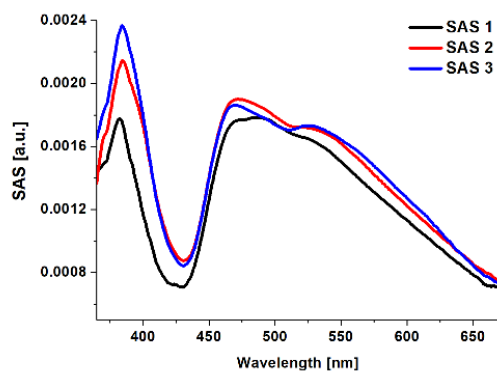

(a)

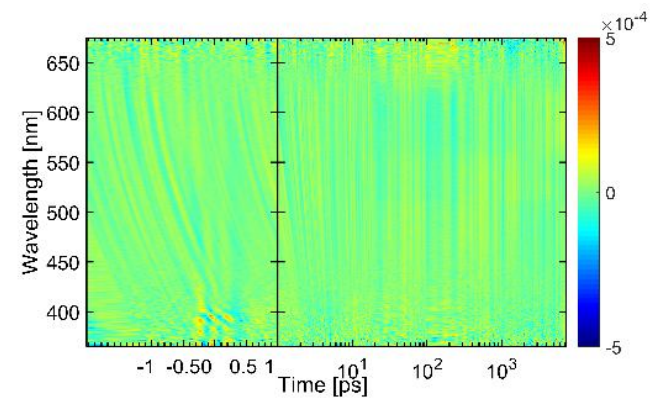

(b)

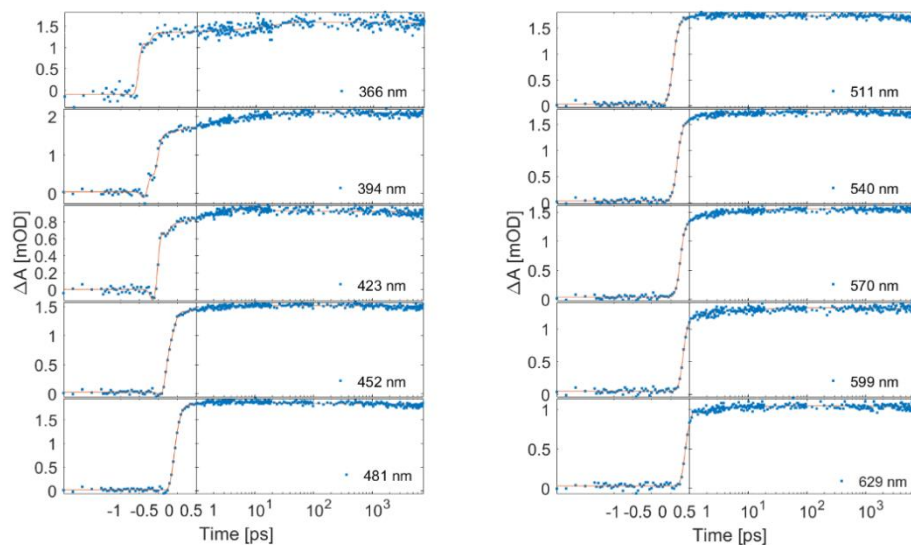

(c)

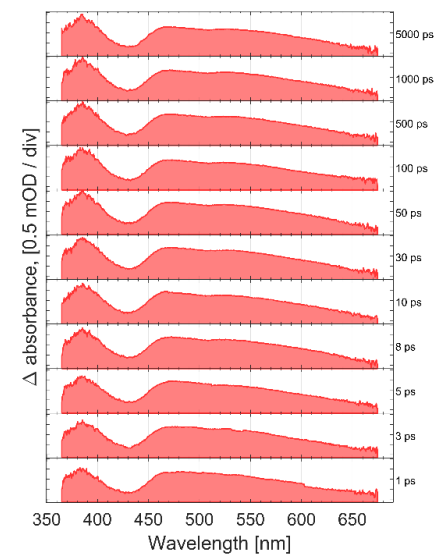

(d)

**Figure S31.** Summary of the global lifetime analysis of **3** (pump wavelength 355 nm; pump power 0.25  $\mu$ J per pulse, solvent: acetonitrile) containing evolution associated spectra (a), residual map (b), time traces at several wavelengths (c), and transient spectra (d).

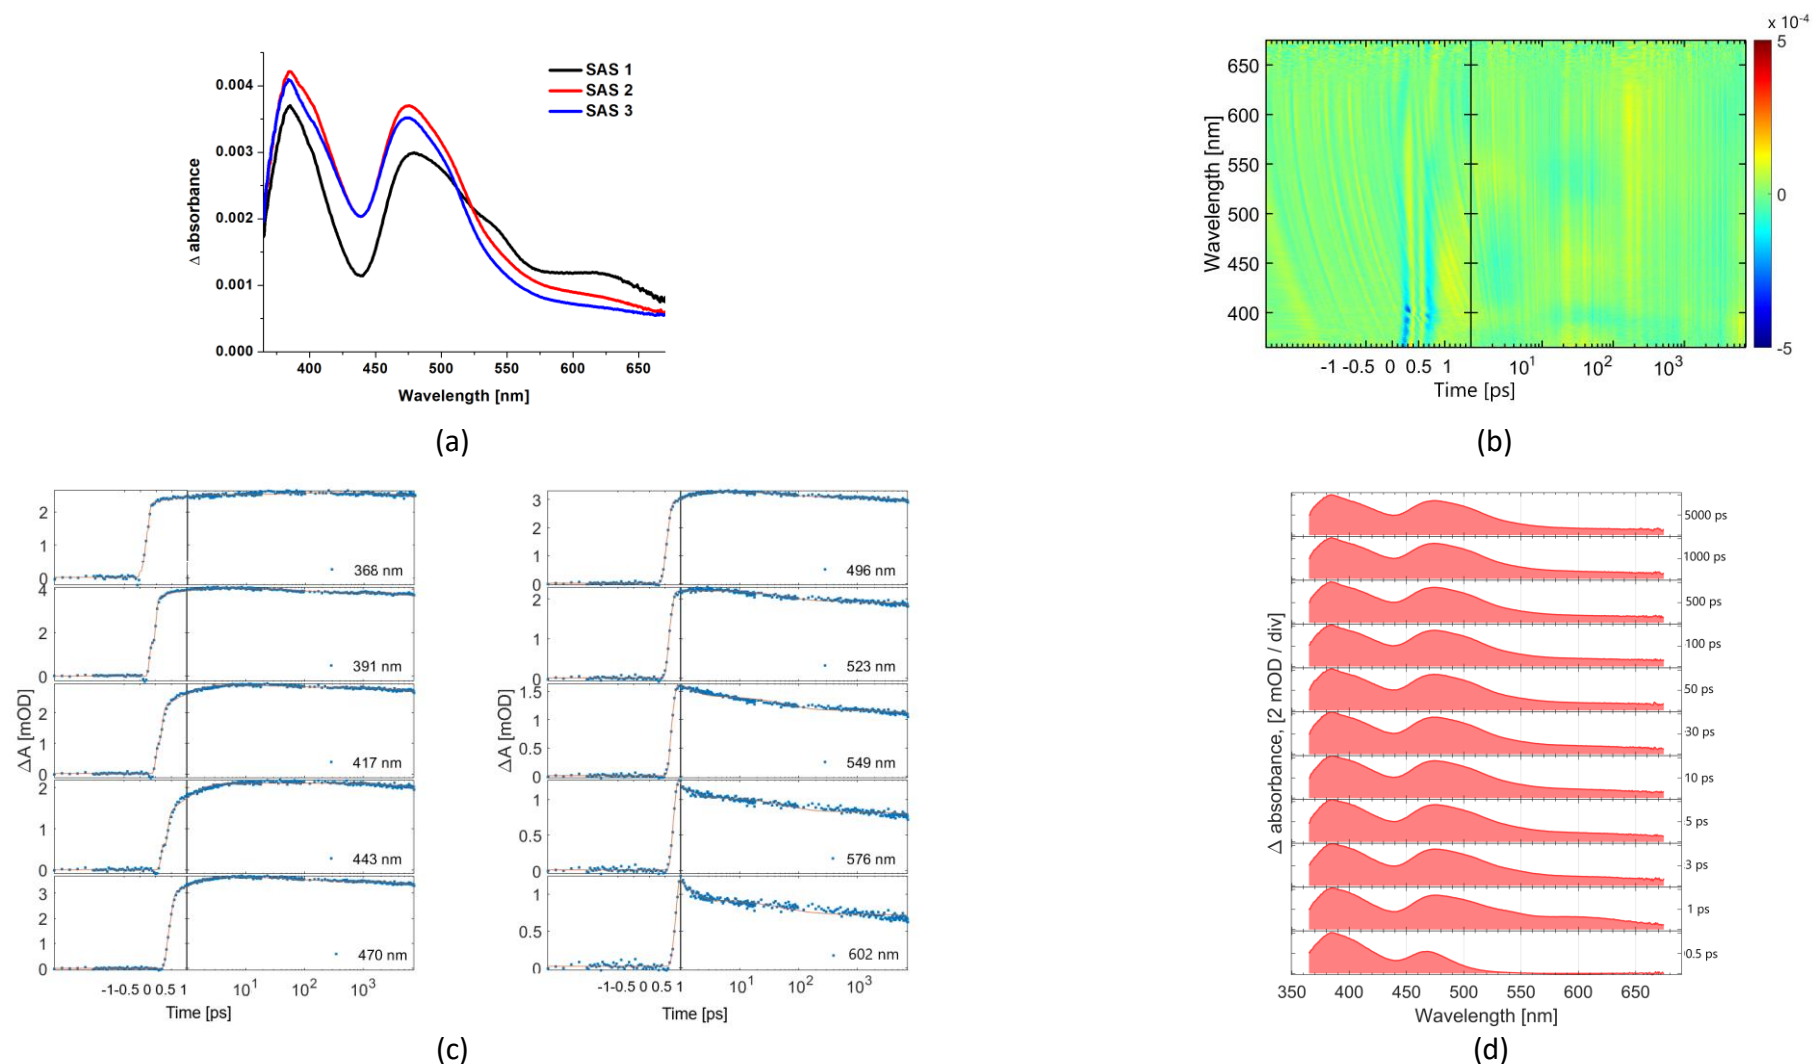

**Figure S32.** Summary of the global lifetime analysis of **4** (pump wavelength 355 nm; pump power 0.25  $\mu\text{J}$  per pulse, solvent: acetonitrile) containing evolution associated spectra (a), residual map (b), time traces at several wavelengths (c), and transient spectra (d).

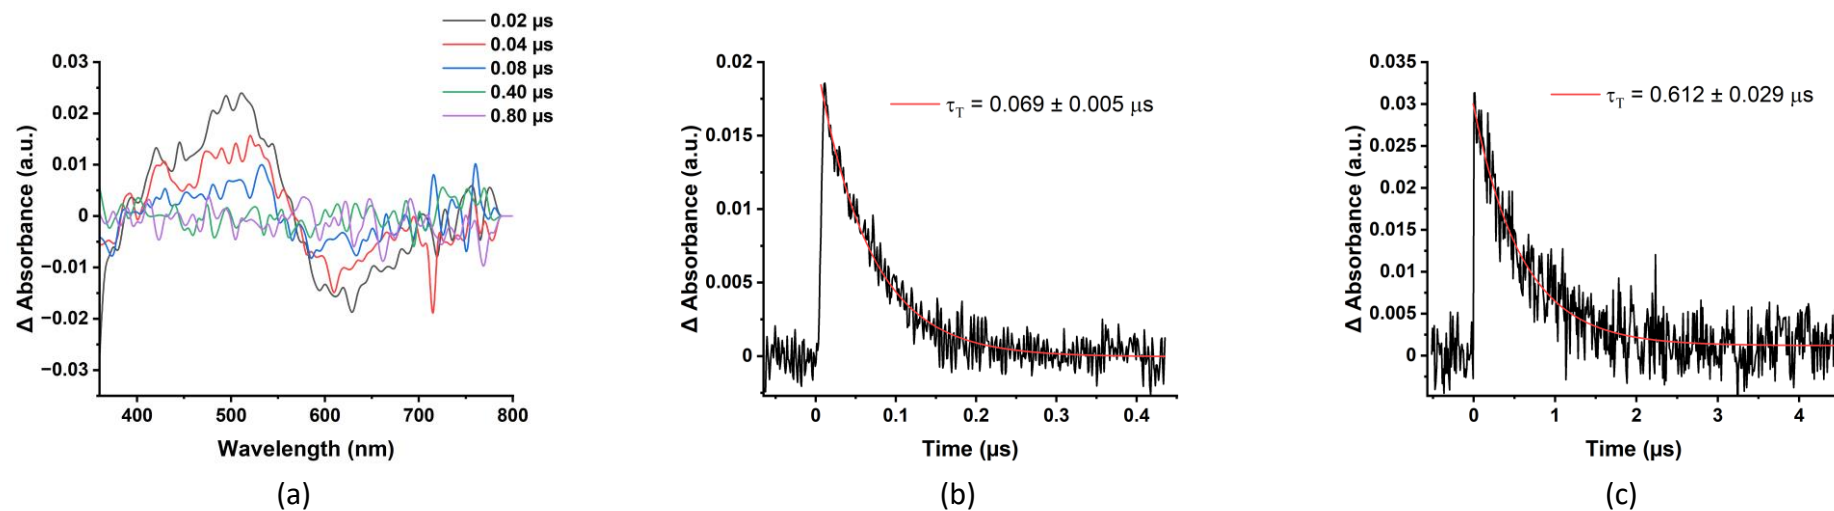

**Figure S33.** Transient triplet-triplet absorption spectrum (a) recorded at different times after excitation with a laser pulse at a wavelength of 355 nm and kinetic decay curve of triplet states with fitting recorded in aerated (b) and in de-aerated (c) conditions for compound **1**. The decay curves were recorded at a wavelength of 510 nm which corresponding to the maximum of the transient absorption spectrum. Solvent: acetonitrile.

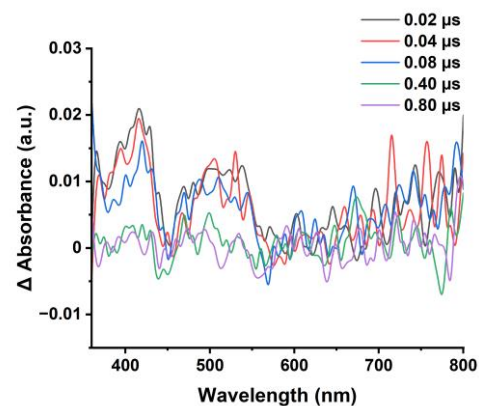

(a)

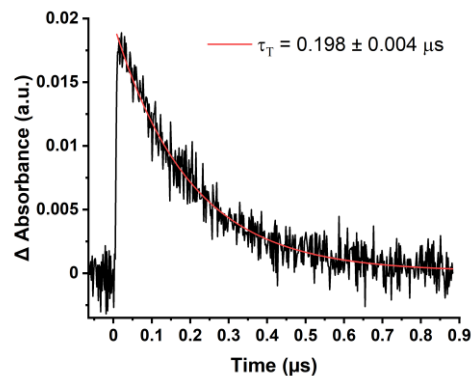

(b)

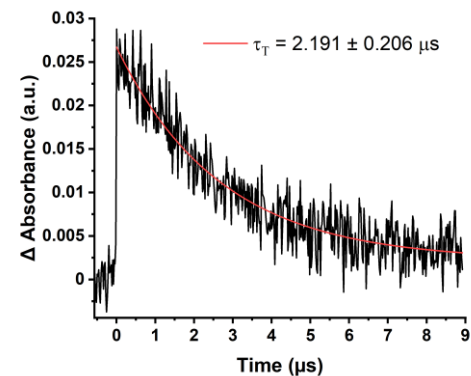

(c)

2

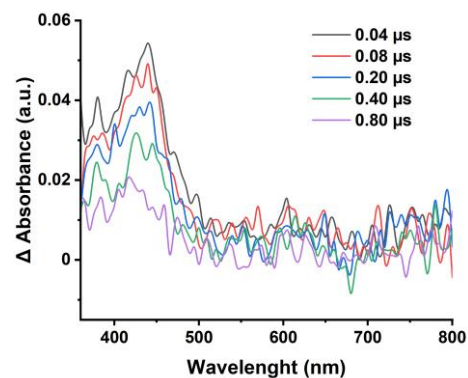

(d)

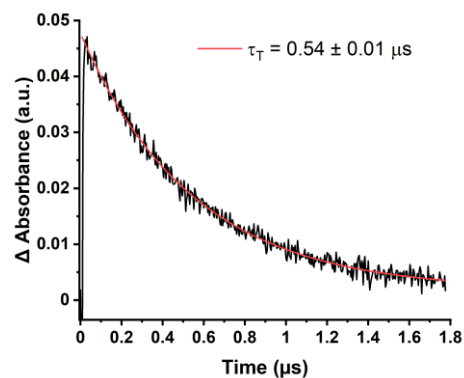

(e)

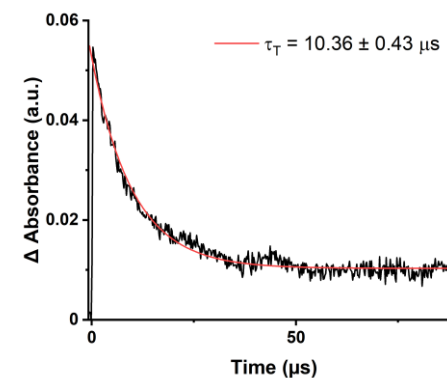

(f)

Ph-quin

**Figure S34.** Transient triplet-triplet absorption spectra (a,d) recorded at different times after excitation with a laser pulse at a wavelength of 355 nm and kinetic decay curve of triplet states with fitting recorded in aerated (b,e) and in de-aerated (c,f) conditions for compound 2 (upper) and ligand Ph-quin (lower). The decay curves were recorded at a wavelength of 415 nm which corresponding to the maximum of the transient absorption spectrum. Solvent: acetonitrile.

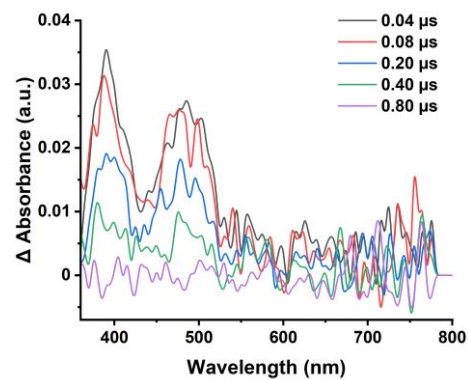

(a)

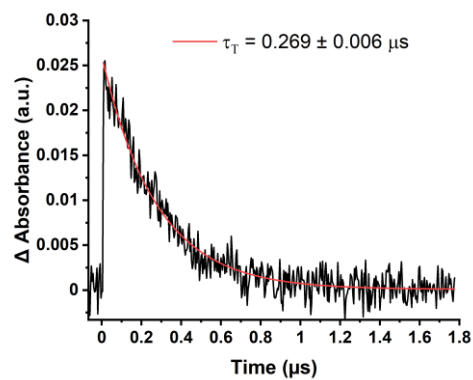

(b)

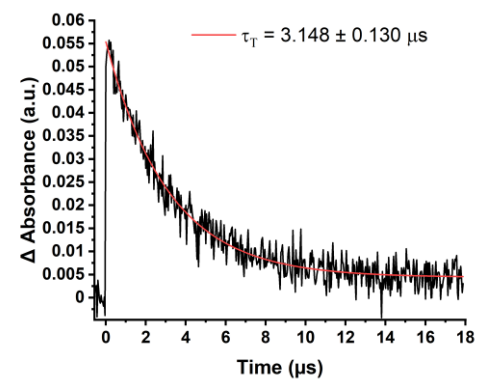

(c)

**3**

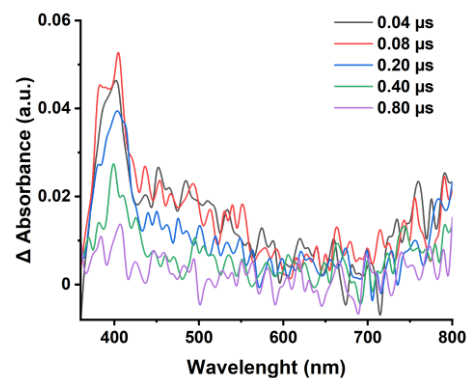

(d)

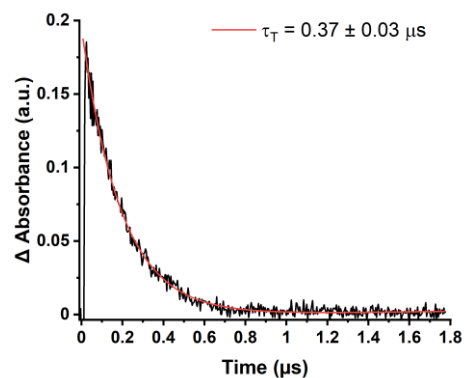

(e)

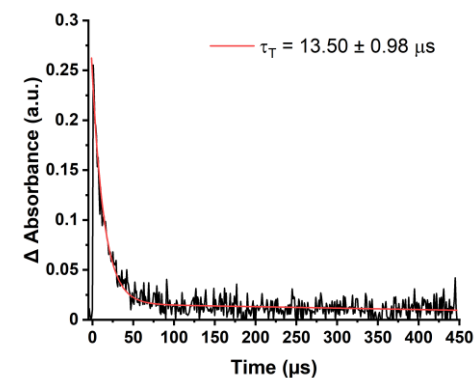

(f)

**Ph-btz**

**Figure S35.** Transient triplet-triplet absorption spectra (a,d) recorded at different times after excitation with a laser pulse at a wavelength of 355 nm and kinetic decay curve of triplet states with fitting recorded in aerated (b,e) and in de-aerated (c,f) conditions for compound **3** (upper) and ligand Ph-btz (lower). The decay curves were recorded at a wavelength of 390 nm which corresponding to the maximum of the transient absorption spectrum. Solvent: acetonitrile.

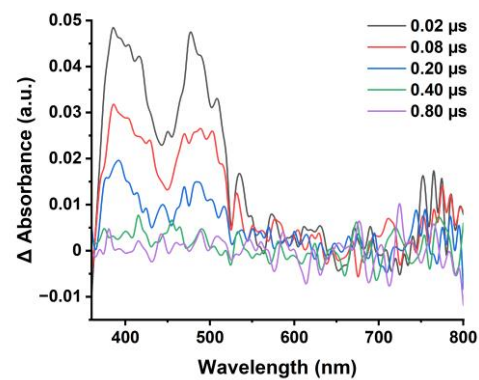

(a)

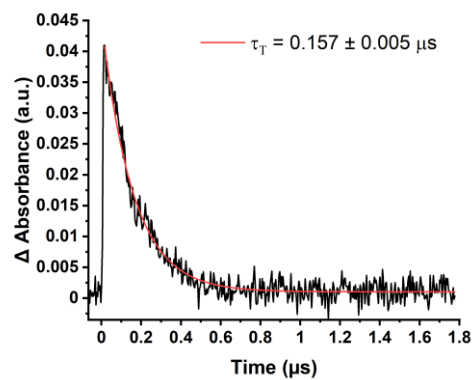

(b)

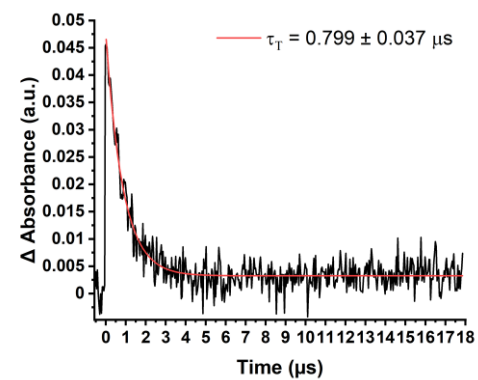

(c)

**4**

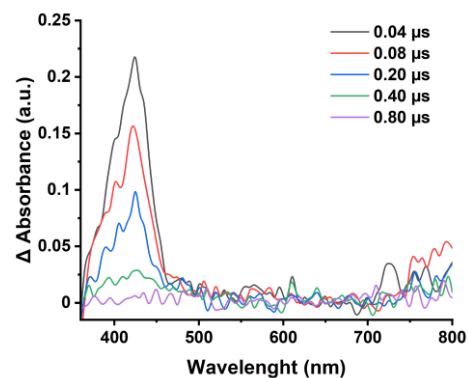

(d)

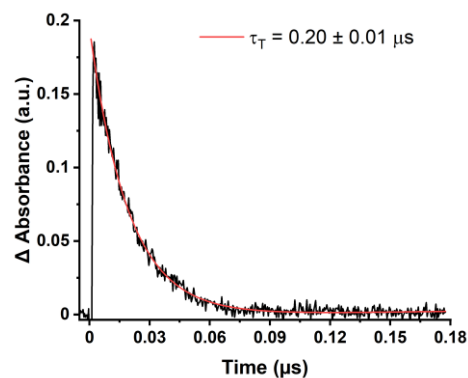

(e)

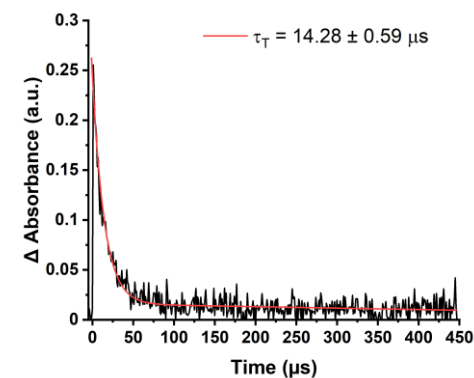

(f)

**Py-bzth**

**Figure S36.** Transient triplet-triplet absorption spectra (a,d) recorded at different times after excitation with a laser pulse at a wavelength of 355 nm and kinetic decay curve of triplet states with fitting recorded in aerated (b,e) and in de-aerated (c,f) conditions for compound **4** (upper) and ligand Py-bzth (lower). The decay curves were recorded at a wavelength of 395 nm which corresponding to the maximum of the transient absorption spectrum. Solvent: acetonitrile.

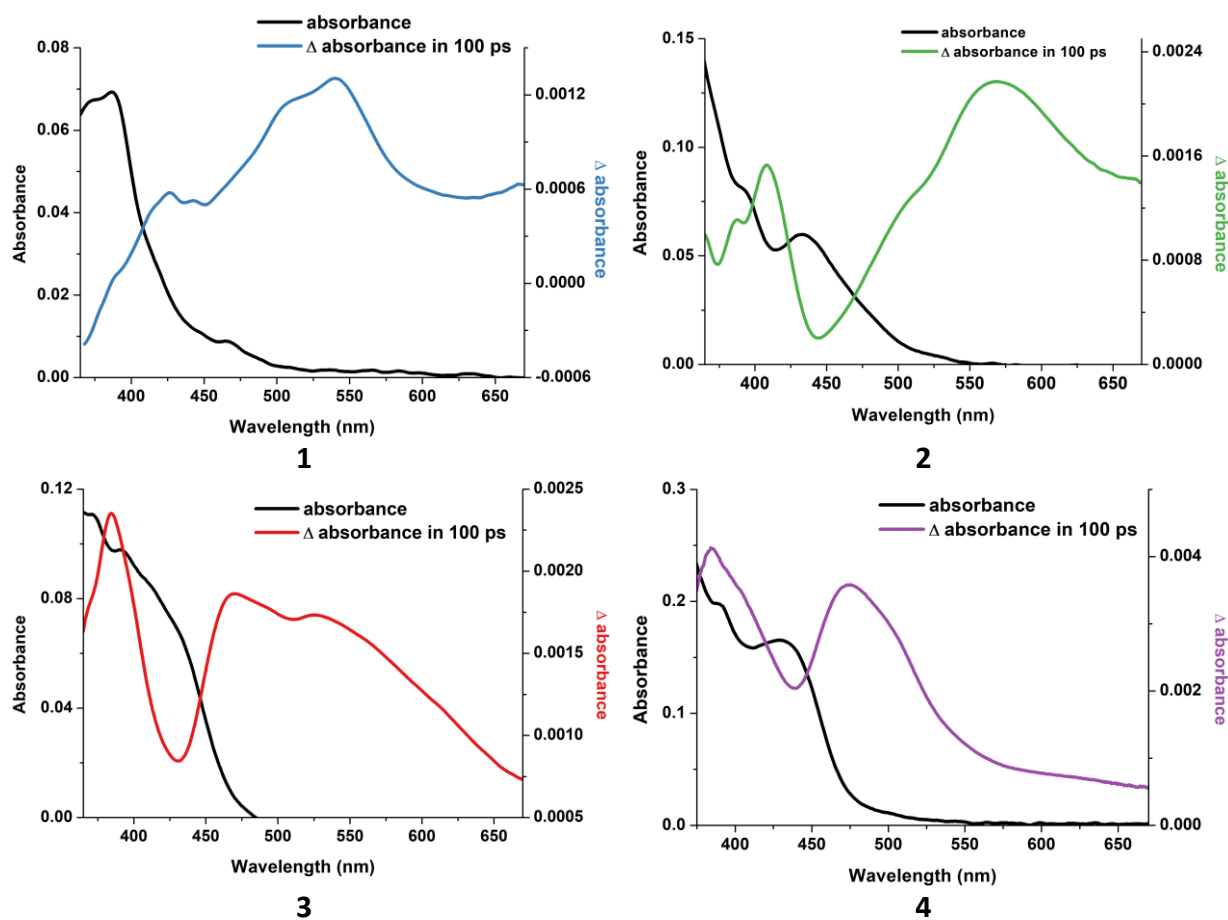

**Figure S37.** Comparison of decay associated spectra of **1–4** in 100 ps delay time and UV-Vis spectra in acetonitrile.

## REFERENCES

- 1 CrysAlis PRO, Oxford Diffraction/Agilent Technologies UK Ltd, Yarnton, England Oxford Diffraction/Agilent Technologies UK Ltd, Yarnton, England 2014.
- 2 G. M. Sheldrick, *Acta Crystallogr. A*, 2008, **64**, 112–122.
- 3 G. M. Sheldrick, *Acta Crystallogr. Sect. C Struct. Chem.*, 2015, **71**, 3–8.
- 4 G. M. Sheldrick, *Acta Crystallogr. Sect. Found. Adv.*, 2015, **71**, 3–8.
- 5 L. V. Lutkus, S. S. Rickenbach and T. M. McCormick, *J. Photochem. Photobiol. Chem.*, 2019, **378**, 131–135.
- 6 Chemcraft - graphical software for visualization of quantum chemistry computations (version 1.8, build 682) <https://www.chemcraftprog.com>.
- 7 C. Adamo and V. Barone, *J. Chem. Phys.*, 1999, **110**, 6158–6170.
- 8 M. Ernzerhof and G. E. Scuseria, *J. Chem. Phys.*, 1999, **110**, 5029–5036.
- 9 D. Andrae, U. Häußermann, M. Dolg, H. Stoll and H. Preuß, *Theor. Chim. Acta*, 1990, **77**, 123–141.
- 10 J. M. L. Martin and A. Sundermann, *J. Chem. Phys.*, 2001, **114**, 3408–3420.
- 11 K. L. Schuchardt, B. T. Didier, T. Elsethagen, L. Sun, V. Gurumoorthi, J. Chase, J. Li and T. L. Windus, *J. Chem. Inf. Model.*, 2007, **47**, 1045–1052.
- 12 B. P. Pritchard, D. Altarawy, B. Didier, T. D. Gibson and T. L. Windus, *J. Chem. Inf. Model.*, 2019, **59**, 4814–4820.
- 13 F. Weigend and R. Ahlrichs, *Phys. Chem. Chem. Phys.*, 2005, **7**, 3297–3305.
- 14 F. Weigend, *Phys. Chem. Chem. Phys.*, 2006, **8**, 1057–1065.
- 15 D. Rappoport and F. Furche, *J. Chem. Phys.*, 2010, **133**, 134105.
- 16 E. Cancès, B. Mennucci and J. Tomasi, *J. Chem. Phys.*, 1997, **107**, 3032–3041.
- 17 B. Mennucci and J. Tomasi, *J. Chem. Phys.*, 1997, **106**, 5151–5158.
- 18 M. Cossi, V. Barone, B. Mennucci and J. Tomasi, *Chem. Phys. Lett.*, 1998, **286**, 253–260.
- 19 M. J. Frisch, G. W. Trucks, H. B. Schlegel, G. E. Scuseria, M. A. Robb, J. R. Cheeseman, G. Scalmani, V. Barone, G. A. Petersson, H. Nakatsuji, X. Li, M. Caricato, A. V. Marenich, J. Bloino, B. G. Janesko, R. Gomperts, B. Mennucci, H. P. Hratchian, J. V. Ortiz, A. F. Izmaylov, J. L. Sonnenberg, Williams, F. Ding, F. Lipparini, F. Egidi, J. Goings, B. Peng, A. Petrone, T. Henderson, D. Ranasinghe, V. G. Zakrzewski, J. Gao, N. Rega, G. Zheng, W. Liang, M. Hada, M. Ehara, K. Toyota, R. Fukuda, J. Hasegawa, M. Ishida, T. Nakajima, Y. Honda, O. Kitao, H. Nakai, T. Vreven, K. Throssell, J. A. Montgomery Jr., J. E. Peralta, F. Ogliaro, M. J. Bearpark, J. J. Heyd, E. N. Brothers, K. N. Kudin, V. N. Staroverov, T. A. Keith, R. Kobayashi, J. Normand, K. Raghavachari, A. P. Rendell, J. C. Burant, S. S. Iyengar, J. Tomasi, M. Cossi, J. M. Millam, M. Klene, C. Adamo, R. Cammi, J. W. Ochterski, R. L. Martin, K. Morokuma, O. Farkas, J. B. Foresman and D. J. Fox, Gaussian 16 Rev. C.01 2016.
- 20 K. Choroba, S. Kula, A. Maroń, B. Machura, J. Małecki, A. Szłapa-Kula, M. Siwy, J. Grzelak, S. Maćkowski and E. Schab-Balcerzak, *Dyes Pigments*, 2019, **169**, 89–104.
- 21 K. Choroba, S. Kotowicz, A. Maroń, A. Świtlicka, A. Szłapa-Kula, M. Siwy, J. Grzelak, K. Sulowska, S. Maćkowski, E. Schab-Balcerzak and B. Machura, *Dyes Pigments*, 2021, **192**, 109472.
- 22 A. Szłapa-Kula, M. Małecka, A. M. Maroń, H. Janeczek, M. Siwy, E. Schab-Balcerzak, M. Szalkowski, S. Maćkowski, T. Pedzinski, K. Erfurt and B. Machura, *Inorg. Chem.*, 2021, **60**, 18726–18738.
- 23 C. Slavov, H. Hartmann and J. Wachtveitl, *Anal. Chem.*, 2015, **87**, 2328–2336.
